# Supplementary material
Source: publisher figshare collection journal article supplement (https://acs.figshare.com/ndownloader/files/14877161)
Supplement: Supplementary file 1 [file 14877161]

# **HFIP solvent enables alcohols to act as alkylating agents in stereoselective heterocyclization**

**Yuxiang Zhu, Ignacio Colomer, Amber L. Thompson and Timothy J. Donohoe\***

---

[\*] Yuxiang Zhu, Dr I. Colomer, Amber L. Thompson and Prof. T. J. Donohoe,  
Department of Chemistry,  
University of Oxford,  
Chemistry Research Laboratory,  
Mansfield Road,  
Oxford,  
OX1 3TA (UK)  
E-mail: [timothy.donohoe@chem.ox.ac.uk](mailto:timothy.donohoe@chem.ox.ac.uk)

## Table of Contents

|                                                                      |     |
|----------------------------------------------------------------------|-----|
| 1. General experimental details                                      | S5  |
| 2. Synthesis of allyl alcohols.                                      | S5  |
| 2.1. Synthesis of ( <i>E</i> )-2b                                    | S5  |
| 2.2. Synthesis of ( <i>Z</i> )-2k                                    | S6  |
| 2.3. Synthesis of ( <i>Z</i> )-2m                                    | S6  |
| 3. Synthesis of homoallyl alcohols.                                  | S7  |
| 3.1. Synthesis of S1                                                 | S7  |
| 3.2. Synthesis of S2                                                 | S7  |
| 3.3. Synthesis of (+)-S3                                             | S8  |
| 3.4. Synthesis of S4                                                 | S9  |
| 3.5. Synthesis of ( <i>Z</i> )-1e                                    | S9  |
| 4. General procedure for the synthesis of styrenes                   | S10 |
| 4.1. Synthesis of S5                                                 | S10 |
| 4.2. Synthesis of S6                                                 | S10 |
| 4.3. Synthesis of S7                                                 | S11 |
| 4.4. Synthesis of S8                                                 | S12 |
| 4.5. Synthesis of S9                                                 | S12 |
| 5. General procedure for the Ru-catalyzed alkene metathesis reaction | S13 |
| 5.1. Synthesis of S10                                                | S13 |
| 5.2. Synthesis of S11                                                | S13 |
| 5.3. Synthesis of S12                                                | S14 |
| 5.4. Synthesis of S13                                                | S14 |
| 5.5. Synthesis of S14                                                | S15 |
| 5.6. Synthesis of S15                                                | S15 |
| 5.7. Synthesis of S16                                                | S16 |
| 5.8. Synthesis of ( <i>E</i> )-1h                                    | S16 |
| 5.9. Synthesis of ( <i>E</i> )-1i                                    | S17 |
| 5.10. Synthesis of ( <i>E</i> )-1j                                   | S17 |
| 5.11. Synthesis of ( <i>E</i> )-1l                                   | S18 |
| 5.12. Synthesis of ( <i>E</i> )-1m                                   | S19 |
| 5.13. Synthesis of ( <i>E</i> )-1q                                   | S19 |
| 5.14. Synthesis of ( <i>E</i> )-2i                                   | S20 |
| 5.15. Synthesis of ( <i>Z</i> )-2l                                   | S20 |

|                                                                                                  |            |
|--------------------------------------------------------------------------------------------------|------------|
| <b>6. General procedure for acetate deprotection</b>                                             | <b>S21</b> |
| 6.1. Synthesis of ( <i>E</i> )-1a                                                                | S21        |
| 6.2. Synthesis of ( <i>E</i> )-1b                                                                | S21        |
| 6.3. Synthesis of ( <i>E</i> )-1c                                                                | S22        |
| 6.4. Synthesis of ( <i>E</i> )-1d                                                                | S22        |
| 6.5. Synthesis of ( <i>E</i> )-1e                                                                | S22        |
| 6.6. Synthesis of 1f                                                                             | S23        |
| 6.7. Synthesis of 1g                                                                             | S23        |
| 6.8. Synthesis of ( <i>E</i> )-1k                                                                | S24        |
| 6.9. Synthesis of ( <i>E</i> )-1n                                                                | S24        |
| <b>7. General procedure for the synthesis of <i>E</i>-styrenes with a carboxylic acid moiety</b> | <b>S25</b> |
| 7.1. Synthesis of ( <i>E</i> )-1o                                                                | S25        |
| 7.2. Synthesis of ( <i>E</i> )-1p                                                                | S26        |
| <b>8. Screening of reaction conditions for the cyclisation of 1a to 3a</b>                       | <b>S26</b> |
| 8.1. General procedure for the cyclization using alcohols as alkylating agents                   | S27        |
| 8.2. Synthesis of 3a                                                                             | S28        |
| 8.3. Synthesis of 3b                                                                             | S28        |
| 8.4. Synthesis of 3c                                                                             | S29        |
| 8.5. Synthesis of 3d                                                                             | S29        |
| 8.6. Synthesis of 3e                                                                             | S30        |
| 8.7. Synthesis of 3f                                                                             | S31        |
| 8.8. Synthesis of 3g                                                                             | S31        |
| 8.9. Synthesis of 3h                                                                             | S32        |
| 8.10. Synthesis of 3i                                                                            | S33        |
| 8.11. Synthesis of 3j                                                                            | S35        |
| 8.12. Synthesis of 3k                                                                            | S35        |
| 8.13. Synthesis of 3l                                                                            | S37        |
| 8.14. Synthesis of 3m                                                                            | S37        |
| 8.15. Synthesis of 3n                                                                            | S38        |
| 8.16. Synthesis of 3o                                                                            | S39        |
| 8.17. Synthesis of 3p                                                                            | S39        |
| 8.18. Synthesis of 3q                                                                            | S40        |
| 8.19. Synthesis of 3r                                                                            | S41        |
| 8.20. Synthesis of 3s                                                                            | S41        |
| 8.21. Synthesis of 3t                                                                            | S42        |

|                                                                                  |     |
|----------------------------------------------------------------------------------|-----|
| 8.22. Synthesis of 3u                                                            | S42 |
| 8.23. Synthesis of 3v                                                            | S43 |
| 8.24. Synthesis of 3w                                                            | S43 |
| 8.25. Synthesis of 3x                                                            | S44 |
| 8.26. Synthesis of 3y                                                            | S45 |
| 8.27. Synthesis of 3z                                                            | S45 |
| 8.28. Synthesis of 3aa                                                           | S46 |
| 8.29. Synthesis of 3ab                                                           | S47 |
| 8.30. Synthesis of 3ac                                                           | S48 |
| 8.31. Synthesis of 3ad                                                           | S49 |
| 8.32. Synthesis of 3ae                                                           | S50 |
| 8.33. Synthesis of (+)-3af                                                       | S50 |
| 8.34. Synthesis of (+)-3ag                                                       | S51 |
| 8.35. Synthesis of (+)-3ah                                                       | S52 |
| 8.36. Synthesis of (+)-3ai                                                       | S53 |
| 8.37. Synthesis of <i>trans</i> -3aj                                             | S54 |
| 8.38. Synthesis of <i>cis</i> -3aj                                               | S54 |
| 9. General procedure for the alkene hydrogenation                                | S55 |
| 9.1. Synthesis of 6a                                                             | S56 |
| 9.2. Synthesis of 6b                                                             | S56 |
| 9.3. Synthesis of (+)-6c                                                         | S56 |
| 10. Synthesis of 7                                                               | S57 |
| 11. General procedure for the oxidation of an aromatic ring to a carboxylic acid | S58 |
| 11.1. Synthesis of 8                                                             | S58 |
| 11.2. Synthesis of 9                                                             | S59 |
| 12. General procedure for the acylation and alkylation of a lactone              | S60 |
| 12.1. Synthesis of 10a                                                           | S60 |
| 12.2. Synthesis of 10b                                                           | S60 |
| 12.3. Synthesis of 10c                                                           | S61 |
| 13. HPLC chromatograms                                                           | S63 |
| 14. NMR study of compounds 3b, 3aa and (+)-6c                                    | S67 |
| 15. Mechanistic study                                                            | S69 |
| 16. References                                                                   | S72 |

## 1. General experimental details

$^1\text{H}$  NMR and  $^{13}\text{C}$  NMR spectra were recorded on a 400 MHz or 500MHz spectrometer in  $\text{CDCl}_3$  and referenced to residual solvent peaks. Chemical shifts were quoted in ppm (parts per million) to the nearest 0.01 ppm with signal splitting recorded as singlet (s), doublet (d), triplet (t), quartet (q), quintet (quint) septet (sept), multiplet (m) and broad singlet (br s). Coupling constants,  $J$ , were measured in Hz to the nearest 0.1 Hz.  $^1\text{H}$  and  $^{13}\text{C}$  NMR spectra were recorded at room temperature. All diastereomeric ratio values (d.r.) were based on the crude NMR. The numbering system drawn on the structures and used to assign the NMR peaks is not the same system that was used to generate the chemical name. Infrared spectra were recorded as thin films of neat samples on a Bruker Tensor 27 FT-IR spectrometer equipped with Attenuated Total Reflectance sampling accessories. High resolution mass spectra were given to four decimal places and were recorded on a Bruker MicroTof (resolution = 10000 FWHM) under conditions of electrospray ionization (ESI), electronic ionization (EI) or chemical ionization (CI). Melting points (m.p.) were obtained from recrystallized samples using a Lecia VMTG heated-stage microscope and were uncorrected. The solvent systems used for recrystallization were quoted in parentheses. Flash column chromatography (FCC) was performed using silica gel (60 Å, 0.033-0.070 mm, BDH) or using basic alumina (pH 9.5, 58 Å, 150 mesh, Sigma-Aldrich). TLC analyses were performed on Merck Kiesegel 60 F<sub>254</sub> 0.25 mm precoated silica plates or Macherey-Nagel Alugram Alox N/UV<sub>254</sub> 0.20 mm precoated alumina plates. Reagents obtained from Sigma-Aldrich, Alfa, Fluorochem and TCI suppliers were used directly as supplied. All anhydrous reactions were carried out in flame dried glassware and under an inert atmosphere of argon provided by a balloon. All reactions were stirred with magnetic followers. THF, toluene and  $\text{CH}_2\text{Cl}_2$  were dried by purification through two activated alumina purification columns. Brine refers to a saturated aqueous solution of NaCl.

## 2. Synthesis of allyl alcohols.

### 2.1. (2*E*)-3-(4-Methoxyphenyl)prop-2-en-1-ol (*E*-2b)

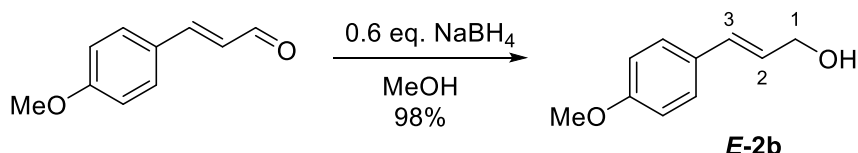

To a stirring solution of 4-methoxycinnamaldehyde (4.800 g, 29.62 mmol) in MeOH (56 mL) under Ar,  $\text{NaBH}_4$  (0.840 g, 17.8 mmol) is slowly added at 0 °C. After 30 min. the ice bath is removed. The reaction was allowed to stir for 12 hours at r.t. The reaction is quenched with saturated  $\text{NH}_4\text{Cl}$  solution and the aqueous layer was extracted three times with  $\text{Et}_2\text{O}$ . The combined organic layers were washed with brine, dried over anhydrous  $\text{MgSO}_4$  and the solvent was removed

in vacuo. Recrystallization afforded alcohol **E-2b** as a white solid (4.850 g, 98%). Spectroscopic properties matched those previously reported.<sup>1</sup>

Data for **E-2b**: **R<sub>f</sub>** 0.5 (80% Et<sub>2</sub>O - pentane). **<sup>1</sup>H NMR (400 MHz, CDCl<sub>3</sub>)**  $\delta$  7.32 (2H, d,  $J$  = 8.7 Hz, Ar), 6.86 (2H, d,  $J$  = 8.7 Hz, Ar), 6.56 (1H, d,  $J$  = 15.9 Hz, 3-H), 6.24 (1H, dt,  $J$  = 15.8, 6.0 Hz, 2-H), 4.29 (2H, dd,  $J$  = 5.9, 1.2 Hz, 1-H<sub>2</sub>), 3.81 (3H, s, OMe), 1.53 (1H, br s, OH). **<sup>13</sup>C NMR (100 MHz, CDCl<sub>3</sub>)**  $\delta$  159.5 (C Ar), 131.1 (C-3), 129.6 (C Ar), 127.8 (2 x CH Ar), 126.4 (C-2), 114.2 (2 x CH Ar), 64.07 (C-1), 55.43 (OMe). **HRMS (CI)**: calculated for C<sub>10</sub>H<sub>13</sub>O<sub>2</sub> [M+H]<sup>+</sup> requires  $m/z$  165.0916, found  $m/z$  165.0919.

## 2.2. (±)-(Z)-Cyclopent-2-en-1-ol (**Z-2k**)

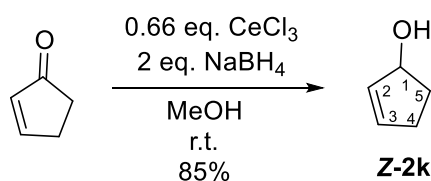

Cerium trichloride (2.000 g, 8.197 mmol) was dissolved in 20 mL of methanol. Then cyclopent-2-enone (1.00 g, 12.3 mmol) was added. After 5 min. of vigorous stirring, sodium borohydride (934 mg, 24.6 mmol) was carefully added portionwise and the resulting heterogeneous mixture was stirred for 15 min. at r. t. Water was added dropwise until a clear solution is seen and then the mixture was extracted twice with Et<sub>2</sub>O. The organic layers were collected, dried over MgSO<sub>4</sub> and the solvents were removed under vacuum. FCC (20% Et<sub>2</sub>O) afforded **Z-2k** as a colorless oil (0.580 g, 85% yield). Spectroscopic properties matched those previously reported.<sup>2</sup>

Data for **Z-2k**: **R<sub>f</sub>** 0.45 (50% Et<sub>2</sub>O - pentane). **<sup>1</sup>H NMR (400 MHz, CDCl<sub>3</sub>)**  $\delta$  5.93-5.99 (1H, m, 3-H), 5.78-5.84 (1H, m, 2-H), 4.82-4.88 (1H, m, 1-H), 2.49 (1H, ddt,  $J$  = 16.6, 10.9, 5.4 Hz, 4-H<sub>A</sub>), 2.17-2.31 (2H, m, 4-H<sub>B</sub> and 5-H<sub>A</sub>), 1.95 (1H, br s, OH), 1.61-1.76 (1H, m, 5-H<sub>B</sub>). **<sup>13</sup>C NMR (100 MHz, CDCl<sub>3</sub>)**  $\delta$  135.2 (C-3), 133.4 (C-2), 77.6 (C-1), 33.3 (C-5), 31.1 (C-4). **HRMS (EI)**: calculated for C<sub>5</sub>H<sub>7</sub>O [M-H]<sup>+</sup> requires  $m/z$  83.0491, found  $m/z$  83.049.

## 2.3. (±)-(Z)-1-Phenylcyclopent-2-en-1-ol (**Z-2m**)

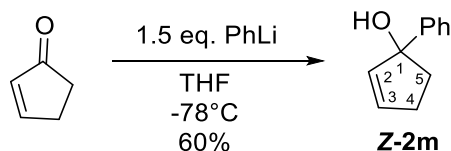

To a solution of Cyclopent-2-enone (0.51 mL, 6.1 mmol) in THF (40 mL) at -78 °C was added 1.88M PhLi (4.9 mL, 9.1 mmol). After the mixture was stirred at -78 °C for 1 hour, H<sub>2</sub>O was added and allowed to warm to r.t. The mixture was extracted with Et<sub>2</sub>O and the organic extract was washed with brine, dried over MgSO<sub>4</sub> and the solvents were removed under vacuum. The residue

was purified (FCC: gradient elution: 5% → 7% Et<sub>2</sub>O - pentane) to yield **Z-2m** as a white solid (0.584 g, 60%). Spectroscopic properties matched those previously reported.<sup>3</sup>

Data for **Z-2m**: *R*<sub>f</sub> 0.5 (60% Et<sub>2</sub>O - pentane). <sup>1</sup>H NMR (400 MHz, CDCl<sub>3</sub>) δ 7.43-7.47 (2H, m, Ar), 7.32-7.38 (2H, m, Ar), 7.23-7.28 (1H, m, Ar), 6.12 (1H, dt, *J* = 5.6, 2.4 Hz, 3-H), 5.88 (1H, dt, *J* = 5.5, 2.2 Hz, 2-H), 2.60-2.70 (1H, m, 4-H<sub>A</sub>), 2.43-2.52 (1H, m, 4-H<sub>B</sub>), 2.24-2.29 (1H, m, 5-H<sub>2</sub>), 1.98 (1H, br s, OH). <sup>13</sup>C NMR (100 MHz, CDCl<sub>3</sub>) δ 147.0 (C Ar), 136.6 (C-2), 134.9 (C-3), 128.2 (2 x CH Ar), 126.8 (CH Ar), 124.9 (2 x CH Ar), 87.0 (C-1), 42.0 (C-5), 31.5 (C-4).

### 3. Synthesis of homoallyl alcohols.

#### 3.1. (±)-2-Methyl-3-phenyloxirane (**S1**)

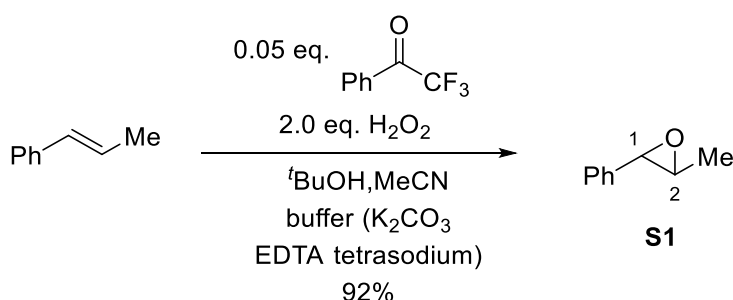

*Trans*-β-Methylstyrene (2.000 g, 16.95 mmol) was placed in a round-bottom flask followed by 2,2,2-trifluoro-1-phenylethanone (147 mg, 0.846 mmol). *tert*-Butyl alcohol (25 mL), aqueous buffer solution (25 mL, 0.6 M K<sub>2</sub>CO<sub>3</sub>, 4 × 10<sup>-5</sup> M EDTA tetrasodium salt), acetonitrile (1.9 mL), and 30% aqueous H<sub>2</sub>O<sub>2</sub> (3.9 mL, 34 mmol) were added consecutively. The reaction mixture was allowed to stir for 1 h at room temperature. Then the reaction was quenched by addition of sodium thiosulfate solution, and the mixture was extracted twice with Et<sub>2</sub>O. The organic layers were collected, dried over MgSO<sub>4</sub> and the solvents were removed under vacuum. FCC (2% Et<sub>2</sub>O) afforded **S1** as a colorless oil (2.090 g, 92% yield). Spectroscopic properties matched those previously reported.<sup>4</sup>

Data for **S1**: *R*<sub>f</sub> 0.45 (50% Et<sub>2</sub>O - pentane). <sup>1</sup>H NMR (400 MHz, CDCl<sub>3</sub>) δ 7.22-7.39 (5H, m, Ar), 3.58 (1H, d, *J* = 2.1 Hz, 1-H), 3.05 (1H, qd, *J* = 5.1, 2.1 Hz, 2-H), 1.46 (3H, d, *J* = 5.1 Hz, Me). <sup>13</sup>C NMR (100 MHz, CDCl<sub>3</sub>) δ 137.9 (C Ar), 128.6 (2 x C-H Ar), 128.2 (C-H Ar), 125.7 (2 x C-H Ar), 59.2 (C-1), 59.2 (C-2), 18.1 (Me). HRMS (CI): calculated for C<sub>9</sub>H<sub>10</sub>O [M]<sup>+</sup> requires *m/z* 134.0726, found *m/z* 134.072.

#### 3.2. 4-Allyltetrahydro-2H-pyran-4-ol (**S2**)

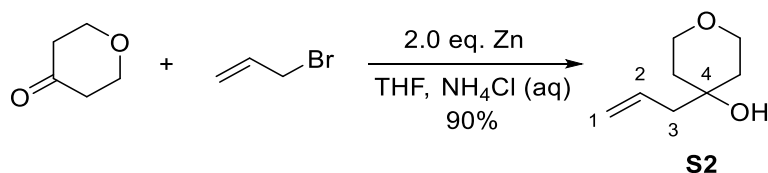

Zinc dust (3.900 g, 61.03 mmol) was slowly added under vigorous stirring to a mixture of tetrahydro-4*H*-pyran-4-one (3.000 g, 30.00 mmol) and allyl bromide (9.000 g, 75.00 mmol) in 10 mL THF, and 30 mL of a saturated aqueous solution of ammonium chloride in such a way that the temperature did not exceed 40°C. The mixture was then stirred for 10 hours at room temperature, 100 ml of 10% aqueous sulfuric acid was added and the mixture was filtered. The organic phase was separated, and the aqueous phase was saturated with sodium chloride and extracted with diethyl ether. The extracts were combined with the organic phase and dried over anhydrous sodium sulfate, and the solvent was distilled off under reduced pressure. The residue was purified (FCC: gradient elution: 15% → 25% Et<sub>2</sub>O - pentane) to yield **S2** as a colorless oil (3.830 g, 90%). Spectroscopic properties matched those previously reported.<sup>5</sup>

Data for **S2**: *R<sub>f</sub>* 0.30 (60% EtOAc - pentane). <sup>1</sup>H NMR (400 MHz, CDCl<sub>3</sub>) δ 5.86 (1H, ddt, *J* = 17.6, 10.2, 7.5 Hz, 2-H), 5.10-5.22 (2H, m, 1-H<sub>2</sub>), 3.68-3.78 (4H, m, 2 x CH<sub>2</sub> tetrahydropyranyl), 2.23 (1H, d, *J* = 7.5 Hz, 3-H<sub>2</sub>), 1.69 (2H, ddd, *J* = 13.8, 10.4, 5.8 Hz, CH<sub>2</sub> tetrahydropyranyl), 1.60 (1H, br s, OH), 1.42-1.51 (2H, m, CH<sub>2</sub> tetrahydropyranyl). <sup>13</sup>C NMR (100 MHz, CDCl<sub>3</sub>) δ 132.6 (C-2), 119.8 (C-1), 68.4 (C-4), 63.9 (2 x CH<sub>2</sub> tetrahydropyranyl), 47.6 (C-3), 37.7 (2 x CH<sub>2</sub> tetrahydropyranyl).

### 3.3. (+)-(*S*)-2-Phenylbut-3-en-1-ol [(+)-**S3**]

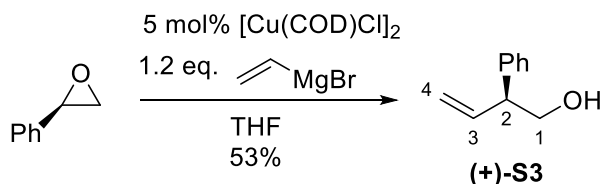

To a solution of (*R*)-phenyloxirane (1.000 g, 8.326 mmol, 1.0 equiv.) and [Cu(COD)Cl]<sub>2</sub> (0.172 g, 0.415 mmol) in THF (12 mL) at -78°C was added vinylmagnesium bromide (10.0 mL, 10.0 mmol, 1.0 M solution in THF). The reaction was allowed to warm to r.t. over 8 h, then it was quenched by the addition of saturated NH<sub>4</sub>Cl solution and extracted with EtOAc. The combined organics were dried over MgSO<sub>4</sub> and concentrated. The crude residue was purified (FCC: gradient elution: 15% → 20% Et<sub>2</sub>O - pentane) to yield (+)-**S3** as a colorless oil (0.650 g, 53%). Spectroscopic properties matched those previously reported.<sup>6</sup> Racemic **S3** (55% yield) was made via the same procedure without using [Cu(COD)Cl]<sub>2</sub>.

Data for (+)-**S3**: *R<sub>f</sub>* 0.40 (40% Et<sub>2</sub>O - pentane). [α]<sub>D</sub><sup>25</sup> = +62.1 (0.01 g/mL, CHCl<sub>3</sub>). <sup>1</sup>H NMR (400 MHz, CDCl<sub>3</sub>) δ 7.20-7.37 (2H, m, Ar), 7.20-7.27 (3H, m, Ar), 6.00 (1H, ddd, *J* = 17.6, 10.4, 7.7 Hz, 3-H), 5.15-5.23 (2H, m, 4-H<sub>2</sub>), 3.81 (2H, t, *J* = 6.0 Hz, 1-H<sub>2</sub>), 3.52 (1H, q, *J* = 7.3 Hz, 2-H), 1.57 (1H, br s, OH). <sup>13</sup>C NMR (100 MHz, CDCl<sub>3</sub>) δ 140.7 (C Ar), 138.3 (C-3), 128.9 (2 x C-H Ar), 128.1 (2 x C-H Ar), 127.1 (C-H Ar), 117.2 (C-4), 66.2 (C-1), 52.6 (C-2). HRMS (CI): calculated for C<sub>10</sub>H<sub>12</sub>O [M]<sup>+</sup> requires *m/z* 148.0883, found *m/z* 148.0882.



### 3.4. (±)- (2*R*,3*S*)-3-Phenylpent-4-en-2-ol (**S4**)

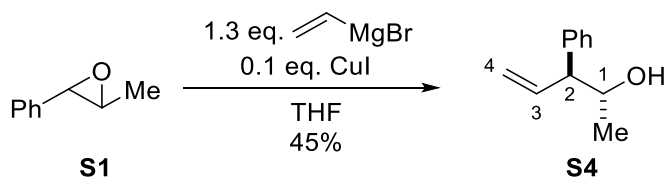

A 50 mL round bottom flask was flame dried and charged with a solution of copper (I) iodide (85.0 mg, 0.448 mmol) in diethyl ether (3.2 mL) and cooled to  $-78^\circ\text{C}$ . The vinyl magnesium bromide solution (1M, 5.8 mL, 5.8 mmol) was added slowly. The resulting solution was stirred for 30 min. and then epoxide **S1** (0.600 g, 4.48 mmol) was added slowly. The solution was stirred overnight and allowed to warm to room temperature. The solution was cooled to  $0^\circ\text{C}$  and  $\text{NH}_4\text{Cl}$  (sat. aq.) was added. The aqueous layer was extracted three times with diethyl ether, dried over anhydrous  $\text{MgSO}_4$ , filtered, and concentrated. The crude residue was purified (FCC: gradient elution: 10%  $\rightarrow$  15%  $\text{Et}_2\text{O}$  - pentane) to yield **S4** as a yellow oil (0.325 g, 45%). Spectroscopic properties matched those previously reported.<sup>7</sup>

Data for **S4**:  $R_f$  0.40 (40%  $\text{Et}_2\text{O}$  - pentane).  $^1\text{H}$  NMR (500 MHz,  $\text{CDCl}_3$ )  $\delta$  7.32-7.37 (2H, m, Ar), 7.24-7.28 (3H, m, Ar), 6.04 (1H, ddd,  $J = 17.5, 9.8, 8.7$  Hz, 3-H), 5.09-5.18 (2H, m, 4- $\text{H}_2$ ), 4.00-4.10 (1H, m, 1-H), 3.25 (1H, t,  $J = 8.2$  Hz, 2-H), 1.51 (1H, br s, OH), 1.25 (3H, d,  $J = 6.2$  Hz, Me).  $^{13}\text{C}$  NMR (125 MHz,  $\text{CDCl}_3$ )  $\delta$  141.0 (C Ar), 138.5 (C-3), 129.0 (2 x C-H Ar), 128.5 (2 x C-H Ar), 127.1 (C-H Ar), 117.0 (C-4), 70.6 (C-1), 59.1 (C-2), 20.8 (Me).

### 3.5. (3*Z*)-4-Phenylbut-3-en-1-ol (**Z-1e**)

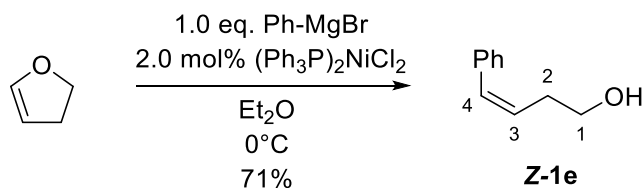

To  $(\text{PPh}_3)_3\text{NiCl}_2$  dry powder (0.094 g, 0.14 mmol), 2,3-dihydrofuran (0.54 mL, 7.1 mmol) in dry  $\text{Et}_2\text{O}$  (8.0 mL) was transferred dropwise *via* a cannula. The resulting suspension was cooled to  $0^\circ\text{C}$  and  $\text{PhMgBr}$  (2.8 M, 2.56 mL, 7.14 mmol) was slowly added dropwise. After stirring for 1 h at  $0^\circ\text{C}$ , the mixture was stirred at room temperature for 6 h, and then poured into sat.  $\text{NH}_4\text{Cl}$  solution (40 mL). The crude product was extracted with  $\text{Et}_2\text{O}$  (3 x 20 mL), then the organic layer was dried over  $\text{Na}_2\text{SO}_4$ , filtered and concentrated to dryness giving a crude residue. Purification using silica gel flash chromatography (cyclohexane/ $\text{EtOAc}$ , 80:20) afforded the alcohol **Z-1e** as a colorless oil (0.750 g, 71%). Spectroscopic properties matched those previously reported.<sup>8</sup>

Data for **Z-1e**:  $R_f$  0.5 (100%  $\text{EtOAc}$ ).  $^1\text{H}$  NMR (400 MHz,  $\text{CDCl}_3$ )  $\delta$  7.28-7.38 (4H, m,

Ar), 7.21-7.27 (1H, m, Ar), 6.59 (1H, d,  $J = 11.7$  Hz, 4-H), 5.70 (1H, dt,  $J = 11.7, 7.4$  Hz, 3-H), 3.75 (2H, t,  $J = 6.5$  Hz, 1-H<sub>2</sub>), 2.62 (2H, qd,  $J = 6.6, 1.8$  Hz, 2-H<sub>2</sub>), 1.54 (1H, br s, OH). **<sup>13</sup>C NMR (100 MHz, CDCl<sub>3</sub>)**  $\delta$  137.3 (C Ar), 131.7 (C-4), 128.8 (2 x CH Ar), 128.4 (C-3), 128.3 (2 x CH Ar), 126.9 (CH Ar), 62.6 (C-1), 32.1 (C-2). **HRMS** (EI): calculated for C<sub>10</sub>H<sub>12</sub>O [M]<sup>+</sup> requires  $m/z$  148.0883, found  $m/z$  148.0888.

#### 4. General procedure for the synthesis of styrenes

A solution of triphenylphosphonium halide (1.2 eq. or 2.0 eq. or 2.3 eq.) in dry solvent (THF or Et<sub>2</sub>O) was placed in a flame-dried round-bottomed flask. The solution was cooled to 0 °C, and the base (1.2 eq. of <sup>t</sup>BuOK or 2.0 eq. of <sup>t</sup>BuOK or 2.3 eq. of <sup>t</sup>BuOK or 4.5 eq. of NaH) was added in one portion. After stirring at 0 °C for 30 min, the aldehyde (1.0 equiv.) was added. The reaction mixture was gradually warmed to room temperature. After 12 h, the reaction was quenched by slow addition of saturated NH<sub>4</sub>Cl. The phases were separated, and the aqueous phase was extracted twice with Et<sub>2</sub>O. The combined organic layers were washed with brine, dried over Na<sub>2</sub>SO<sub>4</sub>. The solvent was evaporated under reduced pressure to give the corresponding styrene, that was purified by chromatography on silica gel using the appropriate mixture of eluents.

##### 4.1. 2-Bromo-4-methoxy-1-vinylbenzene (S5)

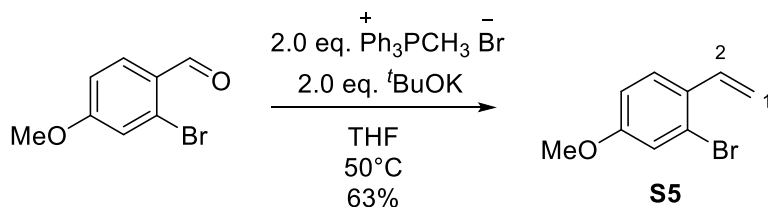

Methyltriphenylphosphonium bromide (3.800 g, 10.64 mmol), <sup>t</sup>BuOK (1.200 g, 10.71 mmol), solution of 2-bromo-4-methoxybenzaldehyde (1.150 g, 5.333 mmol in 2.3 mL THF) and THF (4.6 mL) were subjected to the general procedure except the reaction was heated to 50 °C after the KO<sup>t</sup>Bu was added and before adding the aldehyde (FCC: pentane) to yield **S5** as a colorless oil (0.720 g, 63%). Spectroscopic properties matched those previously reported.<sup>9</sup>

Data for **S5**: **R<sub>f</sub>** 0.50 (5% Et<sub>2</sub>O - pentane). **<sup>1</sup>H NMR (400 MHz, CDCl<sub>3</sub>)**  $\delta$  7.48 (1H, d,  $J = 8.7$  Hz, Ar), 7.09 (1H, d,  $J = 2.4$  Hz, Ar), 6.99 (1H, dd,  $J = 17.4, 10.9$  Hz, 2-H), 6.85 (1H, dd,  $J = 8.7, 2.5$  Hz, Ar), 5.59 (1H, d,  $J = 17.4$  Hz, 1-H<sub>A</sub>), 5.25 (1H, d,  $J = 10.9$  Hz, 1-H<sub>B</sub>), 3.80 (3H, s, OMe). **<sup>13</sup>C NMR (100 MHz, CDCl<sub>3</sub>)**  $\delta$  159.7 (C Ar), 135.2 (C-2), 130.2 (C Ar), 127.3 (CH Ar), 124.1 (C Ar), 117.6 (CH Ar), 114.7 (C-1), 114.2 (CH Ar), 55.7 (OMe). **HRMS** (ESI): calculated for C<sub>9</sub>H<sub>10</sub>BrO [M+H]<sup>+</sup> requires  $m/z$  212.9910, found  $m/z$  212.9909.

#### 4.2. 2,4-Dimethyl-1-vinylbenzene (**S6**)

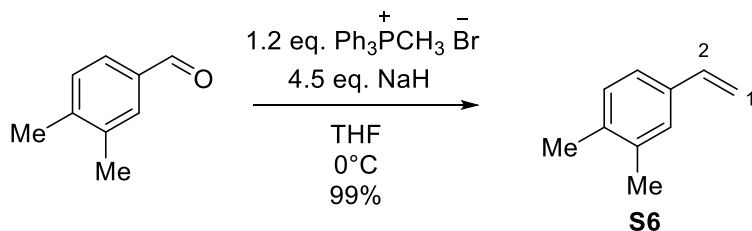

Methyltriphenylphosphonium bromide (6.400 g, 17.92 mmol), NaH (1.613 g, 67.20 mmol), 3,4-dimethoxybenzaldehyde (2.000 g, 14.91 mmol) and THF (74.5 mL) were subjected to the general procedure (FCC: pentane) to yield **S6** as a colorless oil (2.000 g, 99%). Spectroscopic properties matched those previously reported.<sup>10</sup>

Data for **S6**: *R*<sub>f</sub> 0.50 (pentane). <sup>1</sup>H NMR (400 MHz, CDCl<sub>3</sub>) δ 7.23 (1H, s, Ar), 7.19 (1H, d, *J* = 7.8 Hz, Ar), 7.12 (1H, d, *J* = 7.7 Hz, Ar), 6.70 (1H, dd, *J* = 17.6, 10.9 Hz, 2-H), 5.73 (1H, d, *J* = 17.6 Hz, 1-H<sub>A</sub>), 5.20 (1H, d, *J* = 10.8 Hz, 1-H<sub>B</sub>), 2.30 (3H, s, Me), 2.29 (3H, s, Me). <sup>13</sup>C NMR (100 MHz, CDCl<sub>3</sub>) δ 136.9 (C-2), 136.7 (C Ar), 136.4 (C Ar), 135.4 (C Ar), 129.9 (CH Ar), 127.6 (CH Ar), 123.8 (CH Ar), 112.7 (C-1), 19.9 (Me), 19.7 (Me). HRMS (ESI): calculated for C<sub>10</sub>H<sub>13</sub> [M+H]<sup>+</sup> requires *m/z* 133.10118, found *m/z* 133.10120.

#### 4.3. Methylenecyclohexane (**S7**)

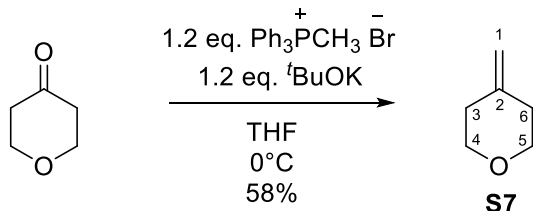

Methyltriphenylphosphonium bromide (17.000 g, 47.592 mmol), <sup>t</sup>BuOK (5.370 g, 48.00 mmol), 4-oxotetrahydropyran (4.000 g, 40.00 mmol) and Et<sub>2</sub>O (130 mL) were subjected to the general procedure (FCC: gradient elution: 3% → 5% Et<sub>2</sub>O - pentane) to yield **S7** as a colorless oil (2.270 g, 58%). Spectroscopic properties matched those previously reported.<sup>11</sup>

Data for **S7**: *R*<sub>f</sub> 0.40 (15% Et<sub>2</sub>O - pentane). <sup>1</sup>H NMR (400 MHz, CDCl<sub>3</sub>) δ 4.71 (2H, s, 1-H<sub>2</sub>), 3.68 (4H, t, *J* = 5.5 Hz, 4-H<sub>2</sub> and 5-H<sub>2</sub>), 2.25 (4H, t, *J* = 5.5 Hz, 3-H<sub>2</sub> and 6-H<sub>2</sub>). <sup>13</sup>C NMR (100 MHz, CDCl<sub>3</sub>) δ 144.7 (C-2), 108.4 (C-1), 69.5 (C-4 and C-5), 35.7 (C-3 and C-6). HRMS (EI): calculated for C<sub>6</sub>H<sub>10</sub>O [M]<sup>+</sup> requires *m/z* 98.0726, found *m/z* 98.0729.

#### 4.4. 2-Vinylphenol (**S8**)

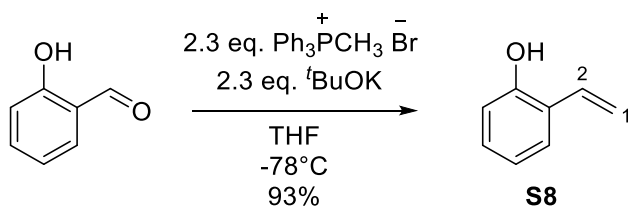

Methyltriphenylphosphonium bromide (8.220 g, 23.01 mmol),  $^t\text{BuOK}$  (2.580 g, 23.04 mmol), salicylaldehyde (1.220 g, 10.00 mmol) and THF (53 mL) were subjected to the general procedure except adding the salicylaldehyde at  $-78^\circ\text{C}$  (FCC: gradient elution: 20%  $\rightarrow$  30%  $\text{Et}_2\text{O}$  - pentane) to yield **S8** as a colorless liquid (1.120 g, 93%). Spectroscopic properties matched those previously reported.<sup>12</sup>

Data for **S8**:  $R_f$  0.5 (40%  $\text{Et}_2\text{O}$  - pentane).  $^1\text{H}$  NMR (400 MHz,  $\text{CDCl}_3$ )  $\delta$  7.40 (1H, dd,  $J$  = 7.6, 1.7 Hz, Ar), 7.15 (1H, ddd,  $J$  = 8.1, 7.3, 1.6 Hz, Ar), 6.96 (1H, dd,  $J$  = 17.7, 11.2 Hz, 2-H), 6.90-6.95 (1H, m, Ar), 6.80 (1H, dd,  $J$  = 8.0, 1.2 Hz, Ar), 5.75 (1H, dd,  $J$  = 17.7, 1.4 Hz, 1- $\text{H}_\text{A}$ ), 5.37 (1H, dd,  $J$  = 11.2, 1.4 Hz, 1- $\text{H}_\text{B}$ ), 5.16 (1H, s, OH).  $^{13}\text{C}$  NMR (100 MHz,  $\text{CDCl}_3$ )  $\delta$  152.9 (C Ar), 131.6 (C-2), 129.0 (C-H Ar), 127.5 (C-H Ar), 124.9 (C Ar), 121.0 (C-H Ar), 116.0 (C-H Ar and C-1). HRMS (CI): calculated for  $\text{C}_8\text{H}_9\text{O}$   $[\text{M}+\text{H}]^+$  requires  $m/z$  121.06479, found  $m/z$  121.06465.

#### 4.5. 2-Vinylphenyl acetate (**S9**)

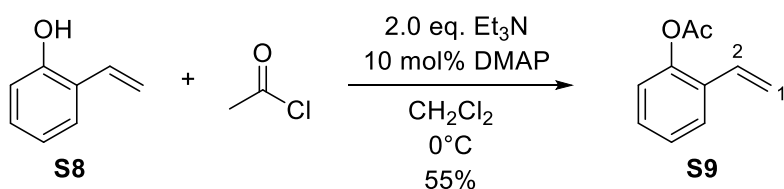

2-Vinylphenol **S8** (0.480 g, 4.000 mmol) was dissolved in  $\text{CH}_2\text{Cl}_2$  (40 mL) and the solution was cooled to  $0^\circ\text{C}$ . Triethylamine (0.808 g, 8.000 mmol) and 4-dimethylaminopyridine (50.0 mg, 0.409 mmol) were added, followed by addition of acetyl chloride (0.468 g, 6.000 mmol). After 30 min, the reaction mixture was warmed up to r.t. and stirred for 2 h. The mixture was quenched with satd aq  $\text{NaHCO}_3$  and the aqueous layer was separated and extracted with  $\text{Et}_2\text{O}$ . The combined extracts were washed with brine, dried over  $\text{Na}_2\text{SO}_4$ , filtered, and concentrated by rotary evaporation. FCC (5%  $\text{Et}_2\text{O}$  - pentane) afforded the acetate **S9** as a colorless oil (0.357 g, 55%). Spectroscopic properties matched those previously reported.<sup>13</sup>

Data for **S9**:  $R_f$  0.4 (20%  $\text{Et}_2\text{O}$  - pentane).  $^1\text{H}$  NMR (400 MHz,  $\text{CDCl}_3$ )  $\delta$  7.59 (1H, d,  $J$  = 7.7 Hz, Ar), 7.30 (1H, t,  $J$  = 7.6 Hz, Ar), 7.24 (1H, t,  $J$  = 7.5 Hz, Ar), 7.06 (1H, d,  $J$  = 8.0 Hz, Ar), 6.77 (1H, dd,  $J$  = 17.6, 11.1 Hz, 2-H), 5.78 (1H, dd,  $J$  = 17.7, 1.8 Hz, 1- $\text{H}_\text{A}$ ), 5.36 (1H, dd,  $J$  = 11.0, 1.8 Hz, 1- $\text{H}_\text{B}$ ), 2.35 (3H, s, Ac Me).  $^{13}\text{C}$  NMR (100 MHz,  $\text{CDCl}_3$ )  $\delta$  169.4 (C=O), 148.1 (C Ar),

130.4 (C-2), 130.3 (C Ar), 128.8 (CH Ar), 126.6 (CH Ar), 126.3 (CH Ar), 122.7 (CH Ar), 116.5 (C-1), 21.0 (Ac Me). **HRMS** (EI): calculated for C<sub>10</sub>H<sub>10</sub>O<sub>2</sub> [M]<sup>+</sup> requires *m/z* 162.0675, found *m/z* 162.0678.

## 5. General procedure for the Ru-catalyzed alkene metathesis reaction

To a flame-dried flask, charged with 1.5 mol% of Ru-catalyst, under Ar, at room temperature, was added 4.0 mL/mmol of dry CH<sub>2</sub>Cl<sub>2</sub> (previously degassed, bubbling Ar during 30 min.). A solution of the mixture of alkenes in dry and degassed CH<sub>2</sub>Cl<sub>2</sub> (1.0 mL/mmol) was added and the mixture was stirred under reflux. The reaction was monitored by TLC until completion, and the solvent was evaporated under reduced pressure to give the corresponding alkene, that was purified by chromatography on silica gel using the appropriate mixture of eluents.

### 5.1. (3E)-4-(4-Methoxyphenyl)but-3-en-1-yl acetate (S10)

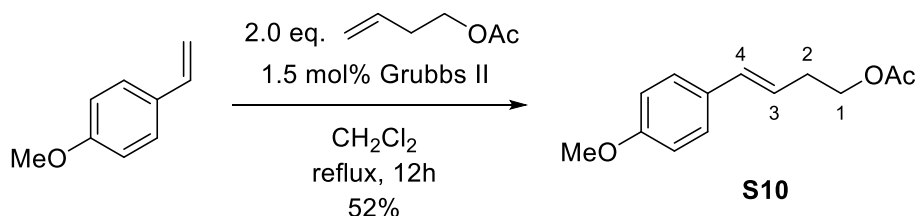

1-Methoxy-4-vinylbenzene (5.000 g, 37.28 mmol), but-3-en-1-yl acetate (8.510 g, 74.58 mmol) and Grubbs II (0.470 g, 0.554 mmol) were subjected to the general procedure (FCC: 5% Et<sub>2</sub>O - pentane) to yield **S10** as a yellow oil (4.250 g, 52%). Spectroscopic properties matched those previously reported.<sup>14</sup>

Data for **S10**: *R<sub>f</sub>* 0.30 (10% Et<sub>2</sub>O - pentane). <sup>1</sup>H NMR (400 MHz, CDCl<sub>3</sub>) δ 7.28 (2H, d, *J* = 8.4 Hz, Ar), 6.84 (2H, m, *J* = 8.8 Hz, Ar), 6.41 (1H, d, *J* = 15.9 Hz, 4-H), 6.02 (1H, dt, *J* = 15.8 and 7.0 Hz, 3-H), 4.17 (1H, t, *J* = 6.8 Hz, 1-H<sub>2</sub>), 3.79 (3H, s, OMe), 2.52 (1H, qd, *J* = 6.9 and 1.5 Hz, 2-H<sub>2</sub>), 2.05 (3H, s, Ac Me). <sup>13</sup>C NMR (100 MHz, CDCl<sub>3</sub>) δ 171.1 (C=O), 159.0 (C Ar), 131.8 (C-4), 130.1 (C Ar), 127.2 (2 x CH Ar), 123.3 (C-3), 114.0 (2 x CH Ar), 63.9 (C-1), 55.3 (OMe), 32.4 (C-2), 21.0 (Ac Me). **HRMS** (ESI): calculated for C<sub>13</sub>H<sub>16</sub>O<sub>3</sub>Na [M+Na]<sup>+</sup> requires *m/z* 243.0991, found *m/z* 243.0994.

### 5.2. (3E)-4-(2-Bromo-4-methoxyphenyl)but-3-en-1-yl acetate (S11)

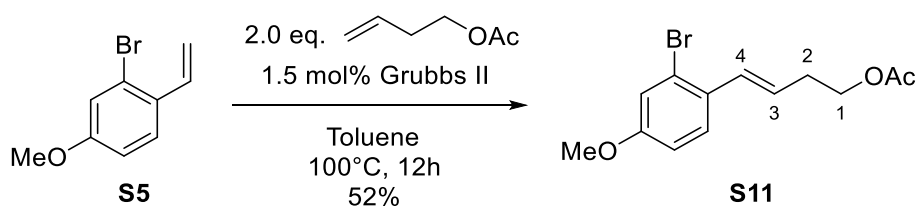

Styrene **S5** (0.648 g, 3.04 mmol), but-3-en-1-yl acetate (0.693 g, 6.08 mmol) and Grubbs II (39.0 mg, 0.0460 mmol) were subjected to the general procedure except conducting the reaction in toluene at 100°C (FCC: 5% Et<sub>2</sub>O - pentane) to yield **S11** as a colorless oil (0.471 g, 52%).

Data for **S11**: **R<sub>f</sub>** 0.3 (30% Et<sub>2</sub>O - pentane). **<sup>1</sup>H NMR (400 MHz, CDCl<sub>3</sub>)** δ 7.40 (1H, d, *J* = 8.7 Hz, Ar), 7.07 (1H, d, *J* = 2.7 Hz, Ar), 6.82 (1H, dd, *J* = 8.7, 2.7 Hz, Ar), 6.72 (1H, d, *J* = 15.8 Hz, 4-H), 5.99 (1H, dt, *J* = 15.7, 7.0 Hz, 3-H), 4.19 (2H, t, *J* = 6.6 Hz, 1-H<sub>2</sub>), 3.79 (3H, s, OMe), 2.56 (2H, qd, *J* = 6.8, 1.4 Hz, 2-H<sub>2</sub>), 2.06 (3H, s, Ac Me). **<sup>13</sup>C NMR (100 MHz, CDCl<sub>3</sub>)** δ 171.2 (C=O), 159.2 (C Ar), 130.7 (C-4), 129.7 (C Ar), 127.4 (C-H Ar), 126.7 (C-3), 123.5 (C Ar), 117.5 (C-H Ar), 114.2 (C-H Ar), 63.6 (C-1), 55.6 (OMe), 32.4 (C-2), 21.0 (Ac Me). **HRMS (CI)**: calculated for C<sub>13</sub>H<sub>15</sub>BrO<sub>3</sub>Na [M+Na]<sup>+</sup> requires *m/z* 321.00968, found *m/z* 321.00946. **IR (film)** ν<sub>max</sub> : 2980, 2360, 1734, 1600, 1232, 1026 cm<sup>-1</sup>.

### 5.3. (3*E*)-4-(3,4-Dimethylphenyl)but-3-en-1-yl acetate (**S12**)

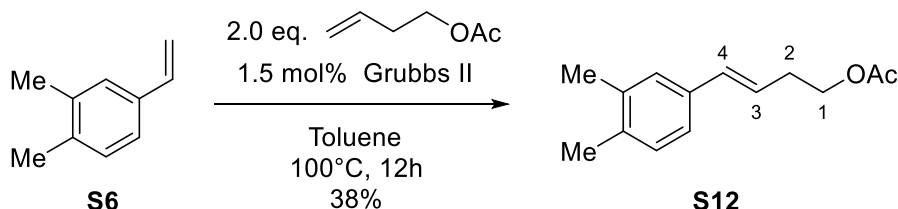

Styrene **S6** (0.513 g, 3.89 mmol), but-3-en-1-yl acetate (0.885 g, 7.77 mmol) and Grubbs II (49.0 mg, 0.0578 mmol) were subjected to the general procedure except conducting the reaction in toluene at 100°C (FCC: 10% Et<sub>2</sub>O - pentane) to yield **S12** as a colorless oil (0.351 g, 38%).

Data for **S12**: **R<sub>f</sub>** 0.3 (20% Et<sub>2</sub>O - pentane). **<sup>1</sup>H NMR (400 MHz, CDCl<sub>3</sub>)** δ 7.15 (1H, s, Ar), 7.12-7.06 (2H, m, Ar), 6.43 (1H, d, *J* = 15.8 Hz, 4-H), 6.12 (1H, dt, *J* = 16.0, 7.0 Hz, 3-H), 4.19 (2H, t, *J* = 6.7 Hz, 1-H<sub>2</sub>), 2.54 (2H, qd, *J* = 6.9, 1.4 Hz, 2-H<sub>2</sub>), 2.26 (3H, s, Me), 2.25 (3H, s, Me), 2.07 (3H, s, Ac Me). **<sup>13</sup>C NMR (100 MHz, CDCl<sub>3</sub>)** δ 171.2 (C=O), 136.7 (C Ar), 135.8 (C Ar), 135.0 (C Ar), 132.4 (C-4), 129.9 (C-H Ar), 127.4 (C-H Ar), 124.4 (C-3), 123.6 (C-H Ar), 63.9 (C-1), 32.5 (C-2), 21.1 (Ac Me), 19.9 (Me), 19.6 (Me). **HRMS**: stable ion was not found in ESI, EI and CI. **IR (film)** ν<sub>max</sub> : 3656, 2980, 1736, 1232, 1033, 965 cm<sup>-1</sup>.

### 5.4. (3*E*)-4-(2-Bromophenyl)but-3-en-1-yl acetate (**S13**)

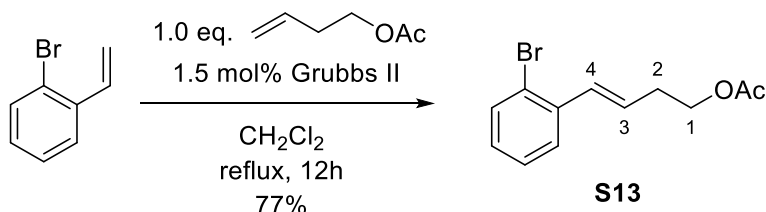

2-Bromostyrene (1.370 g, 7.527 mmol), but-3-en-1-yl acetate (0.855 g, 7.49 mmol) and Grubbs II (48.0 mg, 0.0566 mmol) were subjected to the general procedure (FCC: gradient elution: 4% → 5% Et<sub>2</sub>O - pentane) to yield **S13** as a colorless oil (1.550 g, 77%).

Data for **S13**: *R*<sub>f</sub> 0.40 (20% Et<sub>2</sub>O - pentane). <sup>1</sup>H NMR (400 MHz, CDCl<sub>3</sub>) δ 7.53 (1H, dd, *J* = 8.0, 1.3 Hz, Ar), 7.48 (1H, dd, *J* = 7.8, 1.7 Hz, Ar), 7.22-7.28 (1H, m, Ar), 7.05-7.12 (1H, m, Ar), 6.80 (1H, d, *J* = 15.8 Hz, 4-H), 6.11 (1H, dt, *J* = 15.8, 7.0 Hz, 3-H), 4.22 (2H, t, *J* = 6.6 Hz, 1-H<sub>2</sub>), 2.59 (2H, qd, *J* = 6.7, 1.5 Hz, 2-H<sub>2</sub>), 2.07 (3H, s, Ac Me). <sup>13</sup>C NMR (100 MHz, CDCl<sub>3</sub>) δ 171.2 (C=O), 137.3 (C Ar), 133.0 (CH Ar), 131.5 (C-4), 128.9 (C-3), 128.7 (CH Ar), 127.6 (CH Ar), 127.1 (CH Ar), 123.4 (C Ar), 63.6 (C-1), 32.6 (C-2), 21.1 (Ac Me). HRMS: stable ion was not found in ESI, EI and CI. IR (film) ν<sub>max</sub>: 2963, 1735, 1472, 1233, 1041, 753 cm<sup>-1</sup>.

### 5.5. (3*E*)-4-Phenylbut-3-en-1-yl acetate (**S14**)

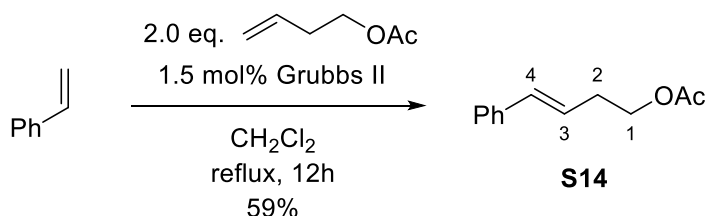

Styrene (0.456 g, 4.38 mmol), but-3-en-1-yl acetate (1.000 g, 8.764 mmol) and Grubbs II (56.0 mg, 0.0660 mmol) were subjected to the general procedure (FCC: gradient elution: 5% → 8% Et<sub>2</sub>O - pentane) to yield **S14** as a white solid (0.494 g, 59%). Spectroscopic properties matched those previously reported.<sup>15</sup>

Data for **S14**: *R*<sub>f</sub> 0.50 (20% Et<sub>2</sub>O - pentane). <sup>1</sup>H NMR (400 MHz, CDCl<sub>3</sub>) δ 7.28-7.38 (4H, m, Ar), 7.19-7.25 (1H, m, Ar), 6.48 (1H, d, *J* = 15.9 Hz, 4-H), 6.18 (1H, dt, *J* = 15.9, 7.0 Hz, 3-H), 4.20 (2H, t, *J* = 6.7 Hz, 1-H<sub>2</sub>), 2.55 (2H, qd, *J* = 6.8, 1.5 Hz, 2-H<sub>2</sub>), 2.06 (3H, s, Ac Me). <sup>13</sup>C NMR (100 MHz, CDCl<sub>3</sub>) δ 171.1 (C=O), 137.3 (C Ar), 132.4 (C-4), 128.6 (2 x CH Ar), 127.3 (CH Ar), 126.1 (2 x CH Ar), 125.6 (C-3), 63.8 (C-1), 32.4 (C-2), 21.0 (Ac Me). HRMS (ESI): calculated for C<sub>12</sub>H<sub>14</sub>O<sub>2</sub>Na [M+Na]<sup>+</sup> requires *m/z* 213.0886, found *m/z* 213.0888.

### 5.6. (1*E*)-2-(4-Methoxystyryl)phenyl acetate (**S15**)

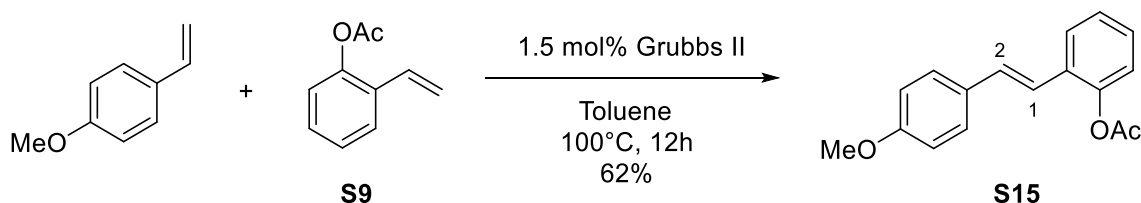

1-Methoxy-4-vinylbenzene (0.590 g, 4.40 mmol), acetate **S9** (0.357 g, 2.20 mmol) and Grubbs II (28.0 mg, 0.0330 mmol) were subjected to the general procedure except conducting the

reaction in toluene at 100°C (FCC: gradient elution: 10% → 12% Et<sub>2</sub>O - pentane) to yield **S15** as a white solid (0.365 g, 62%). Spectroscopic properties matched those previously reported.<sup>16</sup>

Data for **S15**: **R<sub>f</sub>** 0.40 (40% Et<sub>2</sub>O - pentane). **<sup>1</sup>H NMR (400 MHz, CDCl<sub>3</sub>)** δ 7.64-7.69 (1H, m, Ar), 7.43 (2H, d, *J* = 8.4 Hz, Ar), 7.21-7.29 (2H, m, Ar), 7.03-7.10 (2H, m, Ar and 2-H), 6.98 (1H, d, *J* = 16.3 Hz, 1-H), 6.90 (2H, d, *J* = 8.7 Hz, Ar), 3.84 (3H, s, OMe), 2.37 (3H, s, Ac Me). **<sup>13</sup>C NMR (100 MHz, CDCl<sub>3</sub>)** δ 169.5 (C=O), 159.7 (C Ar), 148.1 (C Ar), 130.7 (C-2), 130.4 (C Ar), 130.1 (C Ar), 128.1 (CH Ar), 128.0 (2 x CH Ar), 126.5 (CH Ar), 126.4 (CH Ar), 122.8 (CH Ar), 119.8 (C-1), 114.3 (2 x CH Ar), 55.5 (OMe), 21.1 (Ac Me). **HRMS (ESI)**: calculated for C<sub>17</sub>H<sub>16</sub>O<sub>3</sub>Na [M+Na]<sup>+</sup> requires *m/z* 291.09917, found *m/z* 291.09909.

### 5.7. (4*E*)-5-(4-Methoxyphenyl)pent-4-en-1-yl acetate (**S16**)

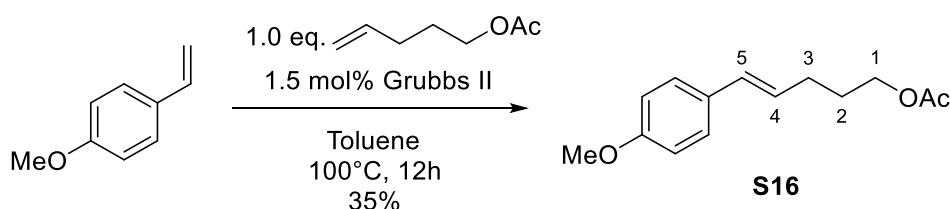

1-Methoxy-4-vinylbenzene (0.499 g, 3.72 mmol), pent-4-en-1-yl acetate (0.952 mg, 7.44 mmol) and Grubbs II (47.0 mg, 0.0554 mmol) were subjected to the general procedure except conducting the reaction in toluene at 100°C (FCC: gradient elution: 8% → 10% Et<sub>2</sub>O - pentane) to yield **S16** as a colorless oil (0.302 g, 35%). Spectroscopic properties matched those previously reported.<sup>17</sup>

Data for **S16**: **R<sub>f</sub>** 0.40 (40% Et<sub>2</sub>O - pentane). **<sup>1</sup>H NMR (400 MHz, CDCl<sub>3</sub>)** δ 7.27 (2H, d, *J* = 8.6 Hz, Ar), 6.83 (2H, d, *J* = 8.7 Hz, Ar), 6.35 (1H, d, *J* = 15.9 Hz, 5-H), 6.05 (1H, dt, *J* = 15.8, 6.9 Hz, 4-H), 4.11 (2H, t, *J* = 6.6 Hz, 1-H<sub>2</sub>), 3.79 (3H, s, OMe), 2.26 (2H, qd, *J* = 7.0, 1.5 Hz, 3-H<sub>2</sub>), 2.05 (3H, s, Ac Me), 1.80 (2H, tt, *J* = 7.6, 6.4 Hz, 2-H<sub>2</sub>). **<sup>13</sup>C NMR (100 MHz, CDCl<sub>3</sub>)** δ 171.6 (C=O), 159.2 (C Ar), 130.8 (C Ar), 130.4 (C-5), 127.54 (C-4), 127.48 (2 x CH Ar), 114.3 (2 x CH Ar), 64.4 (C-1), 55.7 (OMe), 29.8 (C-3), 29.7 (C-2), 21.5 (Ac Me). **HRMS (CI)**: calculated for C<sub>14</sub>H<sub>19</sub>O<sub>3</sub> [M+H]<sup>+</sup> requires *m/z* 235.13287, found *m/z* 235.13284.

### 5.8. (3*E*)-1-[3-(4-Methoxyphenyl)allyl]cyclohexan-1-ol (**E-1h**)

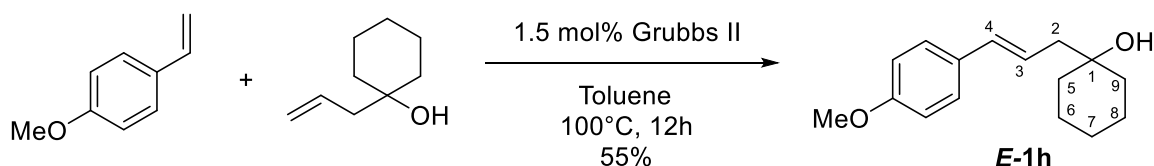

1-Methoxy-4-vinylbenzene (1.900 g, 14.17 mmol), 1-allylcyclohexanol (1.000 g, 7.138 mmol) and Grubbs II (90.0 mg, 0.106 mmol) were subjected to the general procedure except



conducting the reaction in toluene at 100°C (FCC: gradient elution: 12% → 20% Et<sub>2</sub>O - pentane) to yield **E-1h** as a yellow oil (0.964 g, 55%).

Data for **E-1h**: **R<sub>f</sub>** 0.3 (50% Et<sub>2</sub>O - pentane). **<sup>1</sup>H NMR (400 MHz, CDCl<sub>3</sub>)** δ 7.30 (2H, d, *J* = 8.7 Hz, Ar), 6.84 (2H, d, *J* = 8.7 Hz, Ar), 6.40 (1H, d, *J* = 15.8 Hz, 4-H), 6.15 (1H, dt, *J* = 15.5, 7.6 Hz, 3-H), 3.80 (3H, s, OMe), 2.34 (2H, dd, *J* = 7.6, 1.2 Hz, 2-H<sub>2</sub>), 1.42-1.67 (9H, m, 5-H<sub>2</sub>, 6-H<sub>2</sub>, 8-H<sub>2</sub>, 9-H<sub>2</sub> and 7-H<sub>A</sub>), 1.22-1.36 (1H, m, 7-H<sub>B</sub>). **<sup>13</sup>C NMR (100 MHz, CDCl<sub>3</sub>)** δ 158.5 (C Ar), 133.2 (C-4), 130.3 (C Ar), 127.4 (2 x CH Ar), 123.1 (C-3), 114.0 (2 x CH Ar), 71.7 (C-1), 55.4 (OMe), 46.0 (C-2), 37.6 (2 x CH<sub>2</sub> cyclohexenyl), 25.9 (CH<sub>2</sub> cyclohexenyl), 22.3 (2 x CH<sub>2</sub> cyclohexenyl). **HRMS (CI)**: calculated for C<sub>16</sub>H<sub>22</sub>O<sub>2</sub>Na [M+Na]<sup>+</sup> requires *m/z* 269.15120, found *m/z* 269.15106. **IR** (film) ν<sub>max</sub> : 3426, 2928, 1608, 1509, 1244, 967 cm<sup>-1</sup>

### 5.9. (3*E*)-1-[3-(4-Methoxyphenyl)allyl]tetrahydro-2*H*-pyran-1-ol (**E-1i**)

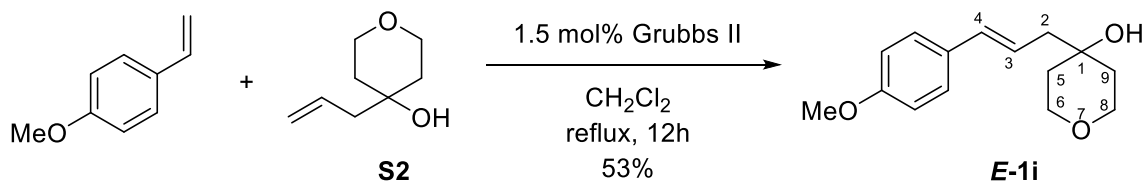

1-Methoxy-4-vinylbenzene (0.734 g, 5.48 mmol), alcohol **S2** (0.389 g, 2.73 mmol) and Grubbs II (35.0 mg, 0.0413 mmol) were subjected to the general procedure (FCC: gradient elution: 15% → 50% Et<sub>2</sub>O - pentane) to yield **E-1i** as a yellow oil (0.365 g, 53%).

Data for **E-1i**: **R<sub>f</sub>** 0.30 (80% Et<sub>2</sub>O - pentane). **<sup>1</sup>H NMR (400 MHz, CDCl<sub>3</sub>)** δ 7.30 (2H, d, *J* = 8.7 Hz, Ar), 6.85 (2H, d, *J* = 8.7 Hz, Ar), 6.44 (1H, d, *J* = 15.8 Hz, 4-H), 6.12 (1H, dt, *J* = 15.5, 7.6 Hz, 3-H), 3.80 (3H, s, OMe), 3.74-3.80 (4H, m, 6-H<sub>2</sub> and 8-H<sub>2</sub>), 2.37 (2H, dd, *J* = 7.7, 1.3 Hz, 2-H<sub>2</sub>), 1.70-1.81 and 1.50-1.56 (4H, m, 5-H<sub>2</sub> and 9-H<sub>2</sub>). **<sup>13</sup>C NMR (100 MHz, CDCl<sub>3</sub>)** δ 159.3 (C Ar), 134.3 (C-4), 130.0 (C Ar), 127.5 (2 x CH Ar), 131.6 (C-3), 114.1 (2 x CH Ar), 69.0 (C-1), 64.0 (C-6 and C-8), 55.5 (OMe), 46.8 (C-2), 37.8 (C-5 and C-9). **HRMS (EI)**: calculated for C<sub>15</sub>H<sub>20</sub>O<sub>3</sub> [M]<sup>+</sup> requires *m/z* 248.1407, found *m/z* 248.1408. **IR** (film) ν<sub>max</sub> : 3408, 2950, 1606, 1509, 1244, 1096 cm<sup>-1</sup>.

### 5.10. (3*E*)-4-(4-Methoxyphenyl)-1,1-dimethylbut-3-en-1-ol (**E-1j**)

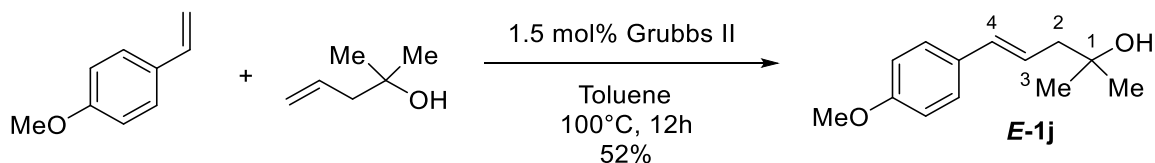

1-Methoxy-4-vinylbenzene (0.937 g, 6.99 mmol), 2-methylpent-4-en-2-ol (0.350 g, 3.50 mmol) and Grubbs II (45.0 mg, 0.0531 mmol) were subjected to the general procedure except

conducting the reaction in toluene at 100 °C (FCC: gradient elution: 20% → 50% Et<sub>2</sub>O - pentane) to yield **E-1j** as a yellow oil (0.376 g, 52%).

Data for **E-1j**: **R<sub>f</sub>** 0.40 (80% Et<sub>2</sub>O - pentane). **<sup>1</sup>H NMR (400 MHz, CDCl<sub>3</sub>)** δ 7.31 (2H, d, *J* = 8.3 Hz, Ar), 6.85 (2H, d, *J* = 8.3 Hz, Ar), 6.41 (1H, d, *J* = 15.8 Hz, 4-H), 6.41 (1H, dt, *J* = 15.8, 7.6 Hz, 3-H), 3.81 (3H, s, OMe), 2.36 (2H, d, *J* = 7.6 Hz, 2-H<sub>2</sub>), 1.63 (1H, br s, OH), 1.27 (6H, s, 2 x Me). **<sup>13</sup>C NMR (100 MHz, CDCl<sub>3</sub>)** δ 159.1 (C Ar), 133.3 (C-4), 130.3 (C Ar), 127.4 (2 x CH Ar), 123.5 (C-3), 114.1 (2 x CH Ar), 71.0 (C-1), 55.5 (OMe), 47.5 (C-2), 29.4 (2 x Me). **HRMS (ESI)**: calculated for C<sub>13</sub>H<sub>18</sub>O<sub>2</sub> [M]<sup>+</sup> requires *m/z* 206.1301, found *m/z* 206.1306. **IR (film)** ν<sub>max</sub> : 3385, 2970, 1576, 1244, 1174, 1033 cm<sup>-1</sup>.

### 5.11. (±)-(2*S*,3*S*,3*E*)-5-(4-Methoxyphenyl)-3-phenylpent-4-en-2-ol (**E-1l**)

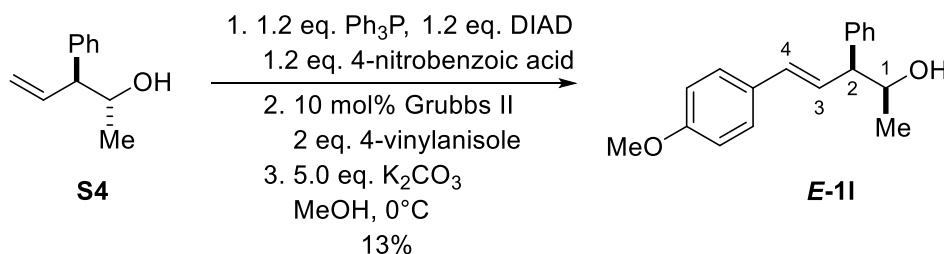

To a mixture of alcohol **S4** (0.060 g, 0.37 mmol), PPh<sub>3</sub> (0.116 g, 0.443 mmol) and para-nitrobenzoic acid (0.072 g, 0.44 mmol) in THF (1 mL) at –20 °C was added dropwise DIAD (0.09 mL, 0.44 mmol) over a period of 30 min. The mixture was then stirred for 1 h while allowing to warm to 0 °C and then diluted with Et<sub>2</sub>O and washed with an aqueous solution of NaHCO<sub>3</sub>. The aqueous layer was extracted with Et<sub>2</sub>O, and the combined organic layers were washed with brine, dried over MgSO<sub>4</sub>, filtered, and concentrated. The crude was flushed through a layer of silica gel with 10% Et<sub>2</sub>O in pentane, then the filtrate was concentrated and added to flame-dried flask, charged with 4-vinylanisole (0.013 g, 0.097 mmol), Grubbs II (4.1 mg, 0.0048 mmol) and degassed toluene (0.24 mL). The solution was heat at 100 °C for 24 hours. Then the solvent was evaporated and the crude was added to a flask charged with K<sub>2</sub>CO<sub>3</sub> (23.0 mg, 0.162 mmol) and MeOH (1 mL) at 0 °C. The solution was stirred for 2 hours, then concentrated in reduced pressure to give the crude residue which was purified (FCC: gradient elution: 13% → 20% Et<sub>2</sub>O - pentane) to yield **E-1l** as a yellow oil (12.9 mg, 13%).

Data for **E-1l**: **R<sub>f</sub>** 0.50 (70% Et<sub>2</sub>O - pentane). **<sup>1</sup>H NMR (500 MHz, CDCl<sub>3</sub>)** δ 7.28-7.35 (4H, m, Ar), 7.20-7.27 (3H, m, Ar), 6.83 (2H, d, *J* = 8.7 Hz, Ar), 6.50 (1H, d, *J* = 15.8 Hz, 4-H), 6.32 (1H, dd, *J* = 15.8, 9.2 Hz, 3-H), 4.04 (1H, quint, *J* = 6.7 Hz, 1-H), 3.79 (3H, s, OMe), 3.29 (1H, t, *J* = 8.4 Hz, 2-H), 1.92 (1H, br s, OH), 1.10 (3H, d, *J* = 6.1 Hz, Me). **<sup>13</sup>C NMR (125 MHz, CDCl<sub>3</sub>)** δ 159.3 (C Ar), 132.1 (C Ar), 132.7 (C-4), 129.8 (C Ar), 128.9 (2 x C-H Ar), 128.1 (2 x C-H Ar), 127.63 (2 x C-H Ar), 127.57 (C-3), 126.9 (C-H Ar), 114.1 (2 x C-H Ar), 70.8 (C-1), 58.5 (C-2),

55.5 (OMe), 20.9 (Me). **HRMS** (EI): calculated for C<sub>18</sub>H<sub>20</sub>O<sub>2</sub> [M]<sup>+</sup> requires *m/z* 268.1458, found *m/z* 268.1466. **IR** (film)  $\nu_{\text{max}}$ : 3657, 2980, 1387, 1249, 1151, 1026 cm<sup>-1</sup>.

### 5.12. (±)-(2*R*,3*S*,3*E*)-5-(4-Methoxyphenyl)-3-phenylpent-4-en-2-ol (*E*-1*m*)

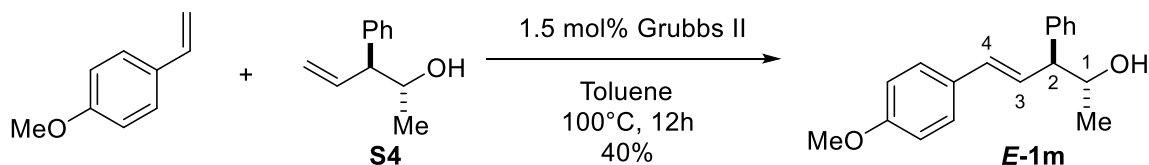

1-Methoxy-4-vinylbenzene (0.358 g, 2.67 mmol), alcohol **S4** (0.217 g, 1.34 mmol) and Grubbs II (17.0 mg, 0.0200 mmol) were subjected to the general procedure except conducting the reaction in toluene at 100°C (FCC: gradient elution: 13% → 20% Et<sub>2</sub>O - pentane) to yield **E-1m** as a yellow oil (0.149 g, 40%).

Data for **E-1m**: **R<sub>f</sub>** 0.40 (60% Et<sub>2</sub>O - pentane). **<sup>1</sup>H NMR** (400 MHz, CDCl<sub>3</sub>)  $\delta$  7.23-7.40 (7H, m, Ar), 6.83 (2H, d, *J* = 8.8 Hz, Ar), 6.43 (1H, d, *J* = 15.8 Hz, 4-H), 6.26 (1H, dd, *J* = 15.8, 8.8 Hz, 3-H), 4.08-4.18 (1H, m, 1-H), 3.80 (3H, s, OMe), 3.38 (1H, t, *J* = 8.3 Hz, 2-H), 1.54 (1H, br s, OH), 1.29 (3H, d, *J* = 6.2 Hz, Me). **<sup>13</sup>C NMR** (100 MHz, CDCl<sub>3</sub>)  $\delta$  159.2 (C Ar), 141.4 (C Ar), 131.5 (C-4), 130.1 (C Ar), 129.0 (2 x C-H Ar), 128.6 (2 x C-H Ar), 127.9 (C-3), 127.5 (2 x C-H Ar), 127.1 (C-H Ar), 114.1 (2 x C-H Ar), 71.0 (C-1), 58.4 (C-2), 55.4 (OMe), 21.0 (Me). **HRMS** (EI): calculated for C<sub>18</sub>H<sub>20</sub>O<sub>2</sub> [M]<sup>+</sup> requires *m/z* 268.1458, found *m/z* 268.1466. **IR** (film)  $\nu_{\text{max}}$ : 3657, 2980, 1387, 1249, 1151, 1026 cm<sup>-1</sup>.

### 5.13. (+)-(2*S*,3*E*)-4-(4-Methoxyphenyl)-2-phenylbut-3-en-1-ol [(+)-(E)-1*q*]

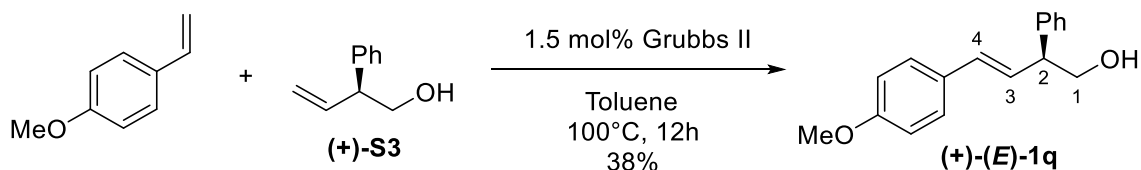

1-Methoxy-4-vinylbenzene (0.708 g, 5.28 mmol), alcohol (+)-**S3** (0.391 g, 2.64 mmol) and Grubbs II (33.6 mg, 0.0396 mmol) were subjected to the general procedure except conducting the reaction in toluene at 100°C (FCC: gradient elution: 15% → 20% Et<sub>2</sub>O - pentane) to yield (+)-(*E*)-**1q** as a yellow solid (0.256 g, 38%). Spectroscopic properties matched those previously reported.<sup>18</sup>

Data for (+)-(*E*)-**1q**: **R<sub>f</sub>** 0.40 (60% Et<sub>2</sub>O - pentane).  $[\alpha]_{\text{D}}^{25} = +61.2$  (0.01 g/mL, CHCl<sub>3</sub>). **<sup>1</sup>H NMR** (400 MHz, CDCl<sub>3</sub>)  $\delta$  7.23-7.40 (7H, m, Ar), 6.84 (2H, d, *J* = 8.8 Hz, Ar), 6.48 (1H, d, *J* = 15.8 Hz, 4-H), 6.23 (1H, dd, *J* = 15.9, 8.0 Hz, 3-H), 3.87-3.93 (2H, m, 1-H<sub>2</sub>), 3.80 (3H, s, OMe), 3.68 (1H, q, *J* = 7.2 Hz, 2-H), 1.53 (1H, s, OH). **<sup>13</sup>C NMR** (100 MHz, CDCl<sub>3</sub>)  $\delta$  159.3 (C Ar), 141.2 (C Ar), 131.8 (C-4), 129.9 (C Ar), 129.0 (2 x CH Ar), 128.1 (2 x CH Ar), 127.6 (2 x CH Ar),

127.5 (C-3), 127.1 (CH Ar), 114.1 (2 x CH Ar), 66.6 (C-1), 55.4 (OMe), 52.0 (C-2). **HRMS** (CI): calculated for C<sub>17</sub>H<sub>18</sub>O<sub>2</sub> [M]<sup>+</sup> requires *m/z* 254.1301, found *m/z* 254.1295.

Racemic (*E*)-**1q** (38% yield) was made via the same procedure using racemic alcohol **S3**.

#### 5.14. (±)- (3*E*)-4-Phenylbut-3-en-2-ol (*E*-**2i**)

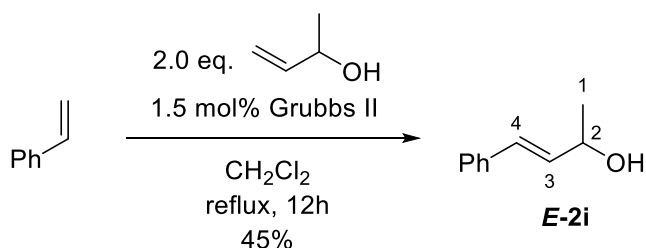

Styrene (1.000 g, 9.606 mmol), but-3-en-2-ol (1.380 g, 19.14 mmol) and Grubbs II (122.0 mg, 0.1438 mmol) were subjected to the general procedure (FCC: 30% Et<sub>2</sub>O - pentane) to yield *E*-**2i** as a yellow oil (0.712 g, 50%). Spectroscopic properties matched those previously reported.<sup>19</sup>

Data for *E*-**2i**: *R*<sub>f</sub> 0.30 (80% Et<sub>2</sub>O - pentane). <sup>1</sup>H NMR (400 MHz, CDCl<sub>3</sub>) δ 7.36-7.41 (2H, m, Ar), 7.29-7.35 (2H, m, Ar), 7.21-7.27 (1H, m, Ar), 6.57 (1H, d, *J* = 15.8 Hz, 4-H), 6.27 (1H, dd, *J* = 15.9, 6.4 Hz, 3-H), 4.44-4.55 (1H, m, 2-H), 1.66 (1H, br s, OH), 1.38 (3H, d, *J* = 6.4 Hz, Me). <sup>13</sup>C NMR (100 MHz, CDCl<sub>3</sub>) δ 136.8 (C Ar), 133.7 (C-3), 129.5 (C-4), 128.7 (2 x C-H Ar), 127.8 (C-H Ar), 126.6 (2 x C-H Ar), 69.1 (C-2), 23.5 (Me).

#### 5.15. (±)-1-Methylcyclopent-2-en-1-ol (*Z*-**2l**)

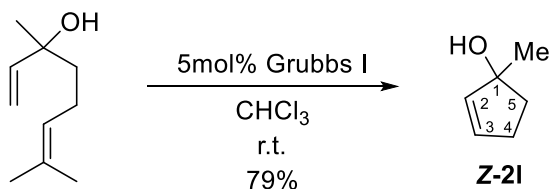

Linalool (0.500 g, 3.23 mmol) and Grubbs I (0.133 g, 0.161 mmol) were subjected to the general procedure except conducting the reaction at r.t. in CHCl<sub>3</sub> (FCC: gradient elution: 20% → 50% Et<sub>2</sub>O - pentane) to yield *Z*-**2l** as a yellow oil (0.250 g, 79%). Spectroscopic properties matched those previously reported.<sup>20</sup>

Data for *Z*-**2l**: *R*<sub>f</sub> 0.40 (80% Et<sub>2</sub>O - pentane). <sup>1</sup>H NMR (400 MHz, CDCl<sub>3</sub>) δ 5.81 (1H, dt, *J* = 5.4, 2.3 Hz, 3-H), 5.69 (1H, dt, *J* = 5.4, 2.3 Hz, 2-H), 2.48 (1H, m, 4-H<sub>A</sub>), 2.30 (1H, m, 4-H<sub>B</sub>), 1.96 (1H, ddd, *J* = 13.4, 8.1, 4.8 Hz, 5-H<sub>A</sub>), 1.89 (1H, ddd, *J* = 13.4, 8.1, 4.8 Hz, 5-H<sub>B</sub>), 1.37 (3H, s, Me). <sup>13</sup>C NMR (100 MHz, CDCl<sub>3</sub>) δ 138.0 (C-2), 132.8 (C-3), 83.6 (C-1), 39.8 (C-5), 31.2 (C-4), 27.6 (Me).

## 6. General procedure for acetate deprotection

To a solution of acetate in MeOH (10.0 mL/mmol), 5.0 equiv of K<sub>2</sub>CO<sub>3</sub> were added in one portion at 0°C. The reaction was monitored by TLC until completion. The mixture was filtered and the solvent was evaporated under reduced pressure to give the corresponding alcohol, that was purified by chromatography on silica gel using the appropriate mixture of eluents.

### 6.1. (3E)-4-(4-Methoxyphenyl)but-3-en-1-ol (*E*-1a)

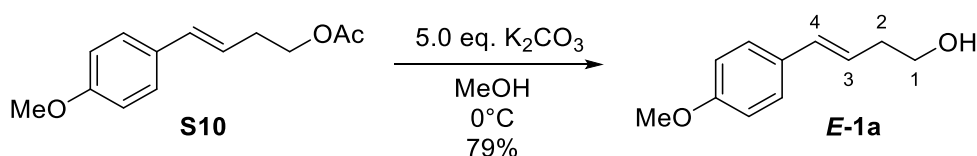

Acetate **S10** (3.510 g, 15.95 mmol) and K<sub>2</sub>CO<sub>3</sub> (6.580 g, 47.68 mmol) were subjected to the general procedure (FCC: gradient elution: 50% → 100% Et<sub>2</sub>O - pentane) to yield **E-1a** as a white solid (2.230 g, 79%). Spectroscopic properties matched those previously reported.<sup>21</sup>

Data for **E-1a**: R<sub>f</sub> 0.33 (75 % Et<sub>2</sub>O - pentane). <sup>1</sup>H NMR (400 MHz, CDCl<sub>3</sub>) δ 7.30 (2H, d, *J* = 8.9 Hz, Ar), 6.84 (2H, d, *J* = 8.8 Hz, Ar), 6.45 (1H, d, *J* = 15.9 Hz, 4-H), 6.05 (1H, dt, *J* = 15.8, 7.2 Hz, 3-H), 3.80 (3H, s, OMe), 3.75 (2H, t, *J* = 7.5 Hz, 1-H<sub>2</sub>), 2.43-2.50 (2H, m, 2-H<sub>2</sub>), 1.47 (1H, br s, OH). <sup>13</sup>C NMR (100 MHz, CDCl<sub>3</sub>) δ 159.0 (C Ar), 132.3 (C-4), 130.1 (C Ar), 127.2 (2 x CH Ar), 124.0 (C-3), 114.0 (2 x CH Ar), 62.1 (C-1), 55.3 (OMe), 36.4 (C-2). HRMS (CI): calculated for C<sub>11</sub>H<sub>15</sub>O<sub>2</sub> [M+H]<sup>+</sup> requires *m/z* 179.1072, found *m/z* 179.1067.

### 6.2. (3E)-4-(2-Bromo-4-methoxyphenyl)but-3-en-1-ol (*E*-1b)

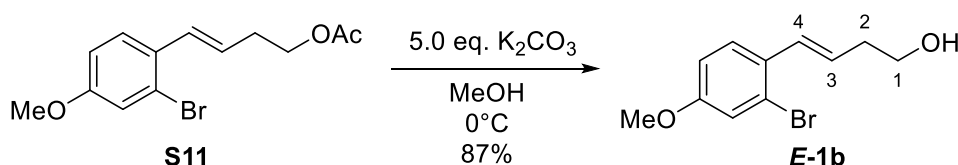

Acetate **S11** (0.396 g, 1.32 mmol) and K<sub>2</sub>CO<sub>3</sub> (0.913 g, 6.62 mmol) were subjected to the general procedure (FCC: gradient elution: 30% → 100% Et<sub>2</sub>O - pentane) to yield **E-1b** as a yellow oil (0.296 g, 87%).

Data for **E-1b**: R<sub>f</sub> 0.30 (80 % Et<sub>2</sub>O - pentane). <sup>1</sup>H NMR (400 MHz, CDCl<sub>3</sub>) δ 7.42 (1H, d, *J* = 8.7 Hz, Ar), 7.07 (1H, d, *J* = 2.6 Hz, Ar), 6.82 (1H, dd, *J* = 8.7, 2.6 Hz, Ar), 6.75 (1H, d, *J* = 15.8 Hz, 4-H), 6.03 (1H, dt, *J* = 16.0, 7.1 Hz, 3-H), 3.78 (3H, s, OMe), 3.76 (2H, t, *J* = 6.7 Hz, 1-H<sub>2</sub>), 2.51 (2H, dq, *J* = 6.3, 1.3 Hz, 2-H<sub>2</sub>), 1.59 (1H, br s, OH). <sup>13</sup>C NMR (100 MHz, CDCl<sub>3</sub>) δ 159.3 (C Ar), 131.1 (C-4), 129.8 (C Ar), 127.6 (C-3), 127.5 (CH Ar), 123.6 (C Ar), 117.6 (CH Ar), 114.3 (CH Ar), 62.1 (C-1), 55.7 (OMe), 36.5 (C-2). HRMS (CI): calculated for C<sub>11</sub>H<sub>14</sub>O<sub>2</sub>Br [M+H]<sup>+</sup> requires *m/z* 257.01717, found *m/z* 257.01703. IR (film) ν<sub>max</sub>: 3341, 2980, 1599, 1487, 1281, 1025 cm<sup>-1</sup>.

### 6.3. (3E)-4-(3,4-Dimethylphenyl)but-3-en-1-ol (*E*-1c)

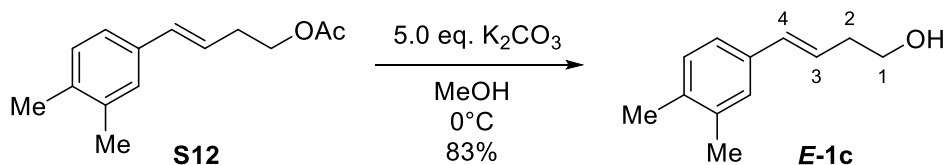

Acetate **S12** (0.351 g, 1.50 mmol) and K<sub>2</sub>CO<sub>3</sub> (1.039 g, 7.529 mmol) were subjected to the general procedure (FCC: gradient elution: 40% → 50% Et<sub>2</sub>O - pentane) to yield *E*-1c as a yellow oil (0.251 g, 83%).

Data for *E*-1c: *R*<sub>f</sub> 0.45 (80 % Et<sub>2</sub>O - pentane). <sup>1</sup>H NMR (400 MHz, CDCl<sub>3</sub>) δ 7.15 (1H, d, *J* = 1.7 Hz, Ar), 7.03-7.12 (2H, m, Ar), 6.45 (1H, d, *J* = 15.9 Hz, 4-H), 6.14 (1H, dt, *J* = 15.8, 7.2 Hz, 3-H), 3.74 (2H, t, *J* = 6.3 Hz, 1-H<sub>2</sub>), 2.47 (2H, qd, *J* = 6.3, 1.4 Hz, 2-H<sub>2</sub>), 2.25 (3H, s, Me), 2.24 (3H, s, Me). <sup>13</sup>C NMR (100 MHz, CDCl<sub>3</sub>) δ 136.7 (C Ar), 135.9 (C Ar), 135.0 (C Ar), 132.9 (C-4), 129.9 (CH Ar), 127.5 (CH Ar), 126.1 (C-3), 123.7 (CH Ar), 62.2 (C-1), 36.6 (C-2), 19.9 (Me), 19.6 (Me). HRMS (EI): calculated for C<sub>12</sub>H<sub>16</sub>O [M]<sup>+</sup> requires *m/z* 176.1196, found *m/z* 176.1194. IR (film) ν<sub>max</sub> : 3335, 2980, 1382, 1154, 1045, 965 cm<sup>-1</sup>.

### 6.4. (3E)-4-(2-Bromophenyl)but-3-en-1-ol (*E*-1d)

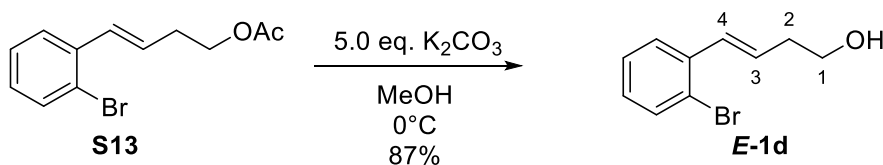

Acetate **S13** (1.550 g, 5.784 mmol) and K<sub>2</sub>CO<sub>3</sub> (4.000 g, 28.99 mmol) were subjected to the general procedure (FCC: gradient elution: 20% → 30% Et<sub>2</sub>O - pentane) to yield *E*-1d as a colorless oil (1.138 g, 87%). Spectroscopic properties matched those previously reported.<sup>22</sup>

Data for *E*-1d: *R*<sub>f</sub> 0.4 (80% Et<sub>2</sub>O - pentane). <sup>1</sup>H NMR (400 MHz, CDCl<sub>3</sub>) δ 7.53 (1H, dd, *J* = 8.0, 1.3 Hz, Ar), 7.50 (1H, dd, *J* = 7.8, 1.7 Hz, Ar), 7.22-7.28 (1H, m, Ar), 7.05-7.10 (1H, m, Ar), 6.83 (1H, d, *J* = 15.8 Hz, 4-H), 6.16 (1H, dt, *J* = 15.8, 7.1 Hz, 3-H), 3.79 (1H, t, *J* = 6.3 Hz, 1-H<sub>2</sub>), 2.53 (1H, dtd, *J* = 7.7, 6.3, 1.5 Hz, 2-H<sub>2</sub>), 1.57 (1H, br s, OH). <sup>13</sup>C NMR (100 MHz, CDCl<sub>3</sub>) δ 137.3 (C Ar), 133.0 (CH Ar), 131.7 (C-4), 129.8 (C-3), 128.7 (CH Ar), 127.6 (CH Ar), 127.1 (CH Ar), 123.4 (C Ar), 62.1 (C-1), 36.6 (C-2). HRMS (CI): calculated for C<sub>10</sub>H<sub>10</sub>OBr [M-H]<sup>+</sup> requires *m/z* 224.99113, found *m/z* 224.99095.

### 6.5. (3E)-4-Phenylbut-3-en-1-ol (*E*-1e)

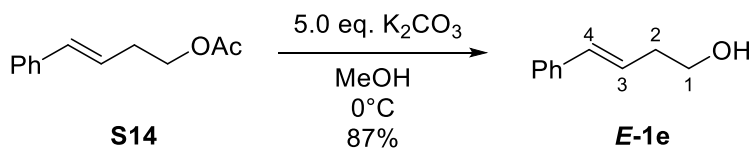

Acetate **S14** (0.541 g, 2.85 mmol) and K<sub>2</sub>CO<sub>3</sub> (1.970 g, 14.28 mmol) were subjected to the general procedure (FCC: gradient elution: 40% → 60% Et<sub>2</sub>O - pentane) to yield **E-1e** as a colorless oil (0.369 g, 87%). Spectroscopic properties matched those previously reported.<sup>23</sup>

Data for **E-1e**: R<sub>f</sub> 0.4 (75% Et<sub>2</sub>O - pentane). <sup>1</sup>H NMR (400 MHz, CDCl<sub>3</sub>) δ 7.28-7.39 (4H, m, Ar), 7.19-7.25 (1H, m, Ar), 6.51 (1H, d, *J* = 15.8 Hz, 4-H), 6.21 (1H, dt, *J* = 15.9, 7.1 Hz, 3-H), 3.73-3.81 (2H, m, 1-H<sub>2</sub>), 2.47-2.53 (2H, m, 2-H<sub>2</sub>), 1.47 (1H, br s, OH). <sup>13</sup>C NMR (100 MHz, CDCl<sub>3</sub>) δ 137.2 (C Ar), 132.9 (C-4), 128.6 (2 x CH Ar), 127.3 (CH Ar), 126.3 (C-3), 126.1 (2 x CH Ar), 62.0 (C-1), 36.4 (C-2). HRMS (CI): calculated for C<sub>10</sub>H<sub>17</sub>ON [M+NH<sub>4</sub>]<sup>+</sup> requires *m/z* 166.1232, found *m/z* 166.1227.

### 6.6. 3-Cyclopentylidenepropan-1-ol (**1f**)

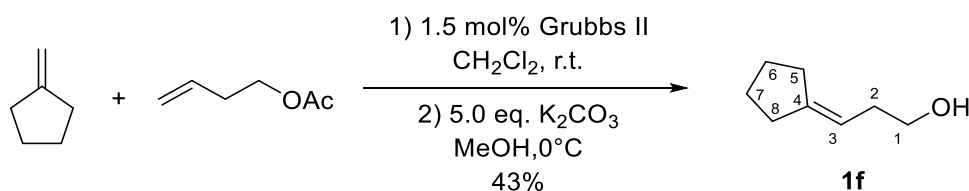

To a solution of but-3-en-1-yl acetate (0.246 g, 2.19 mmol) in methylenecyclopentane (0.898 g, 11.0 mmol) at r.t. was added Grubbs II (26.0 mg, 0.0307 mmol). The mixture was stirred for 72 hours and concentrated in vacuo. To the crude was then added K<sub>2</sub>CO<sub>3</sub> (1.600 g, 11.59 mmol) in MeOH (12 mL) at 0°C. The reaction was monitored by TLC until completion. The mixture was filtered and the solvent was evaporated under reduced pressure, that was purified (FCC: gradient elution: 20% → 30% Et<sub>2</sub>O - pentane) to afford **1f** as a colorless oil (0.120 g, 43%).

Data for **1f**: R<sub>f</sub> 0.4 (50% Et<sub>2</sub>O - pentane). <sup>1</sup>H NMR (400 MHz, CDCl<sub>3</sub>) δ 5.20-5.27 (1H, m, 3-H), 3.63 (1H, t, *J* = 6.3 Hz, 1-H<sub>2</sub>), 2.17-2.31 (6H, m, 2-H<sub>2</sub>, 5-H<sub>2</sub> and 8-H<sub>2</sub>), 1.56-1.72 (4H, m, 6-H<sub>2</sub> and 7-H<sub>2</sub>), 1.49 (1H, br s, OH). <sup>13</sup>C NMR (100 MHz, CDCl<sub>3</sub>) δ 147.3 (C-4), 115.5 (C-3), 62.6 (C-1), 33.9 and 33.3 (C-5 and C-8), 29.0 (C-2), 26.52 and 26.45 (C-6 and C-7). HRMS (ESI): calculated for C<sub>8</sub>H<sub>15</sub>O [M+H]<sup>+</sup> requires *m/z* 127.11174, found *m/z* 127.11185. IR (film) ν<sub>max</sub>: 3332, 2980, 2887, 1432, 1251, 1047 cm<sup>-1</sup>.

### 6.7. 3-(Tetrahydro-4H-pyran-4-ylidene)propan-1-ol (**1g**)

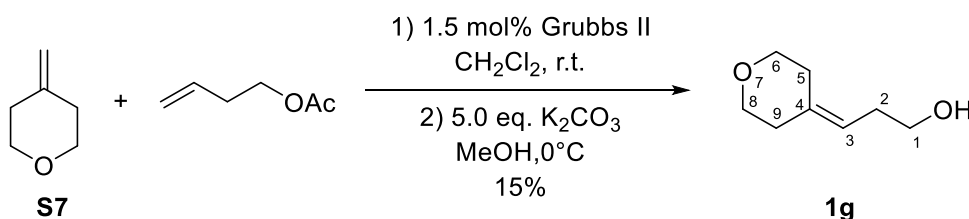

To a solution of but-3-en-1-yl acetate (0.182 g, 1.53 mmol), alkene **S7** (0.300 g, 3.06 mmol) in CH<sub>2</sub>Cl<sub>2</sub> (8 mL) at r.t. was added Grubbs II (20.0 mg, 0.0236 mmol). The mixture was stirred for

72 hours and concentrated in vacuo. To the crude was then added  $K_2CO_3$  (1.060 g, 7.681 mmol) in MeOH (7.7 mL) at  $0^\circ C$ . The reaction was monitored by TLC until completion. The mixture was filtered and the solvent was evaporated under reduced pressure, that was purified by chromatography on silica gel (FCC: gradient elution: 50%  $\rightarrow$  100% Et<sub>2</sub>O - pentane) to afford **1g** as a colorless oil (0.033 g, 15%). Spectroscopic properties matched those previously reported.<sup>24</sup>

Data for **1g**:  $R_f$  0.30 (Et<sub>2</sub>O). <sup>1</sup>H NMR (400 MHz, CDCl<sub>3</sub>)  $\delta$  5.20 (1H, t,  $J$  = 7.5 Hz, 3-H), 3.59-3.73 (6H, m, 1-H<sub>2</sub>, 6-H<sub>2</sub> and 8-H<sub>2</sub>), 2.19-2.35 (6H, m, 2-H<sub>2</sub>, 5-H<sub>2</sub> and 9-H<sub>2</sub>), 1.62 (1H, br s, OH). <sup>13</sup>C NMR (100 MHz, CDCl<sub>3</sub>)  $\delta$  137.7 (C-4), 119.9 (C-3), 69.8 and 69.0 (C-6 and C-8), 62.6 (C-1), 37.1 and 30.6 (C-5 and C-9), 30.0 (C-2). HRMS: stable ion was not found in ESI, EI and CI.

#### 6.8. (1E)-2-(4-Methoxystyryl)phenol (**E-1k**)

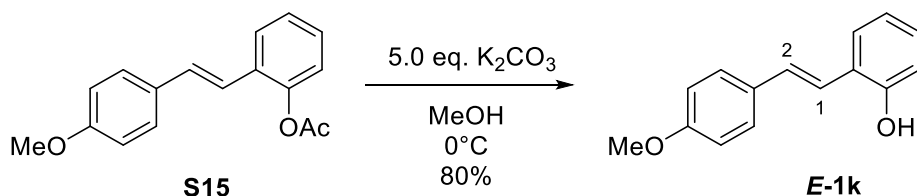

Acetate **S15** (0.345 g, 1.29 mmol) and  $K_2CO_3$  (0.888 g, 6.44 mmol) were subjected to the general procedure (FCC: gradient elution: 20%  $\rightarrow$  50% Et<sub>2</sub>O - pentane) to yield **E-1k** as a white solid (0.230 g, 80%). Spectroscopic properties matched those previously reported.<sup>25</sup>

Data for **E-1k**:  $R_f$  0.4 (50 % Et<sub>2</sub>O - pentane). <sup>1</sup>H NMR (400 MHz, CDCl<sub>3</sub>)  $\delta$  7.42-7.52 (3H, m, Ar), 7.21 (1H, d,  $J$  = 16.4 Hz, 2-H), 7.11 (1H, t,  $J$  = 7.5 Hz, Ar), 7.05 (1H, d,  $J$  = 16.4 Hz, 1-H), 6.93 (1H, t,  $J$  = 7.8 Hz, Ar), 6.89 (2H, d,  $J$  = 8.5 Hz, Ar), 6.79 (1H, d,  $J$  = 8.0 Hz, Ar), 5.12 (1H, s, OH), 3.82 (3H, s, OMe). <sup>13</sup>C NMR (100 MHz, CDCl<sub>3</sub>)  $\delta$  159.4 (C Ar), 153.0 (C Ar), 130.5 (C Ar), 129.9 (C-1), 128.4 (CH Ar), 127.9 (2 x CH Ar), 127.1 (CH Ar), 125.1 (C Ar), 121.2 (CH Ar), 121.0 (C-2), 116.0 (CH Ar), 114.2 (2 x CH Ar), 55.5 (OMe). HRMS (CI): calculated for C<sub>15</sub>H<sub>15</sub>O<sub>2</sub> [M+H]<sup>+</sup> requires  $m/z$  227.10666, found  $m/z$  227.10658.

#### 6.9. (4E)-5-(4-Methoxyphenyl)pent-4-en-1-ol (**E-1n**)

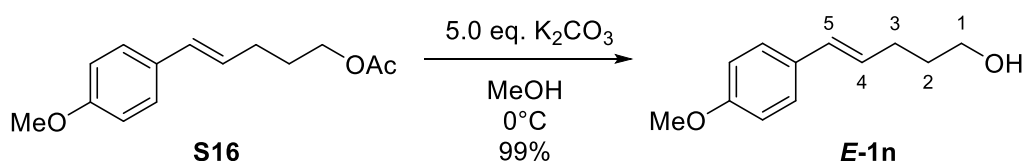

Acetate **S16** (0.304 g, 1.30 mmol) and  $K_2CO_3$  (0.896 g, 6.50 mmol) were subjected to the general procedure (FCC: gradient elution: 40%  $\rightarrow$  100% Et<sub>2</sub>O - pentane) to yield **E-1n** as a white solid (0.249 g, 99%). Spectroscopic properties matched those previously reported.<sup>26</sup>

Data for **E-1n**:  $R_f$  0.30 (60% Et<sub>2</sub>O - pentane). <sup>1</sup>H NMR (400 MHz, CDCl<sub>3</sub>)  $\delta$  7.28 (2H, d,  $J$  = 8.7 Hz, Ar), 6.84 (2H, d,  $J$  = 8.7 Hz, Ar), 6.36 (1H, d,  $J$  = 15.8 Hz, 5-H), 6.09 (1H, dt,  $J$  = 15.7,



6.9 Hz, 4-H), 3.80 (3H, s, OMe), 3.70 (2H, t,  $J = 6.5$  Hz, 1-H<sub>2</sub>), 2.29 (2H, qd,  $J = 7.3, 1.5$  Hz, 3-H<sub>2</sub>), 1.74 (2H, tt,  $J = 7.7, 6.4$  Hz, 2-H<sub>2</sub>), 1.44 (1H, br s, OH). **<sup>13</sup>C NMR (100 MHz, CDCl<sub>3</sub>)**  $\delta$  158.8 (C Ar), 130.6 (C Ar), 129.8 (C-5), 128.0 (C-4), 127.2 (2 x CH Ar), 114.0 (2 x CH Ar), 62.6 (C-1), 55.4 (OMe), 32.5 (C-2), 29.4 (C-3). **HRMS** (Cl): calculated for C<sub>12</sub>H<sub>17</sub>O<sub>2</sub> [M+H]<sup>+</sup> requires  $m/z$  193.12231, found  $m/z$  193.12245.

## 7. General procedure for the synthesis of *E*-styrenes with a carboxylic acid moiety.

To a solution of triphenylphosphonium salt (1.2 eq.) in THF (2 mL) was added dropwise a 1 M solution of NaHMDS (3.5 eq.) at 0 °C. The solution was then stirred for 30 min. After cooling to -78 °C, aldehyde (1.0 eq.) was added dropwise. The reaction was allowed to warm up to r.t. overnight. Add water and Et<sub>2</sub>O and pour the mixture into a separatory funnel. Separate the aqueous layer and acidify with 1 M HCl until pH=1. Extract the aqueous layer with Et<sub>2</sub>O twice. The organic layer was dried with MgSO<sub>4</sub>. Then the solvent was evaporated under reduced pressure to give the acid. FCC afforded the corresponding carboxylic acid.

### 7.1. (3*E*)-4-(4-Methoxyphenyl)but-3-enoic acid (**E-1o**)

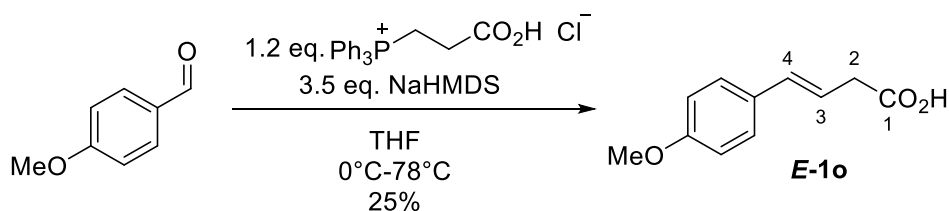

(2-Carboxyethyl)(triphenyl)phosphonium chloride (1.500 g, 4.054 mmol), NaHMDS (1M, 11.5 mL, 11.5 mmol) and 4-methoxybenzaldehyde (0.460 g, 3.37 mmol) were subjected to the general procedure (FCC: 100% EtOAc) to yield **E-1o** as a yellow solid (0.161 g, 25%). Spectroscopic properties matched those previously reported.<sup>27</sup>

Data for **E-1o**: R<sub>f</sub>: 0.5 (100% EtOAc). **<sup>1</sup>H NMR (400 MHz, CDCl<sub>3</sub>)**  $\delta$  10.07 (1H, br s, CO<sub>2</sub>H), 7.31 (2H, d,  $J = 8.7$  Hz, Ar), 6.85 (2H, d,  $J = 8.7$  Hz, Ar), 6.46 (1H, d,  $J = 15.9$  Hz, 4-H), 6.14 (1H, dt,  $J = 15.8, 7.1$  Hz, 3-H), 3.81 (3H, s, OMe), 3.28 (2H, dd,  $J = 7.1, 1.5$  Hz, 2-H<sub>2</sub>). **<sup>13</sup>C NMR (100 MHz, CDCl<sub>3</sub>)**  $\delta$  178.3 (C=O), 159.35 (C Ar), 133.5 (C-4), 129.6 (C Ar), 127.6 (2 x CH Ar), 118.7 (C-3), 114.1 (2 x CH Ar), 55.4 (OMe), 38.2 (C-2). **HRMS** (Cl): calculated for C<sub>11</sub>H<sub>12</sub>O<sub>3</sub> [M]<sup>+</sup> requires  $m/z$  192.0786, found  $m/z$  192.0788.

## 7.2. (4E)-5-(4-Methoxyphenyl)pent-4-enoic acid (*E*-1p)

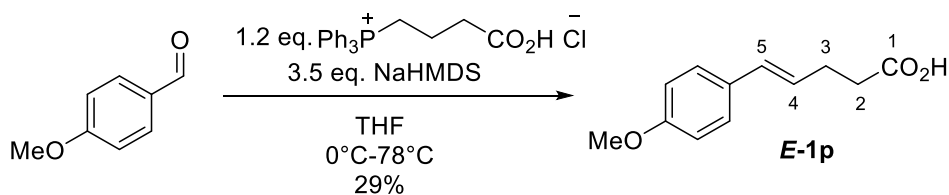

(2-Carboxypropyl)(triphenyl)phosphonium chloride (1.560 g, 4.063 mmol), NaHMDS (1M, 11.5 mL, 11.5 mmol) and 4-methoxybenzaldehyde (0.460 g, 3.37 mmol) were subjected to the general procedure (FCC: 100% EtOAc) to yield ***E*-1p** as a white solid (0.187 g, 29%). Spectroscopic properties matched those previously reported.<sup>13</sup>

Data for ***E*-1p**: **R<sub>f</sub>**: 0.5 (100% EtOAc). **<sup>1</sup>H NMR (400 MHz, CDCl<sub>3</sub>)**  $\delta$  7.28 (2H, d,  $J$  = 8.6 Hz, Ar), 6.84 (2H, d,  $J$  = 8.6 Hz, Ar), 6.39 (1H, d,  $J$  = 15.9 Hz, 5-H), 5.99-6.12 (1H, m, 4-H), 3.80 (3H, s, OMe), 2.50- 2.55 (4 H, m, 2-H<sub>2</sub> and 3-H<sub>2</sub>). **<sup>13</sup>C NMR (100 MHz, CDCl<sub>3</sub>)**  $\delta$  179.0 (C=O), 159.0 (C Ar), 130.7 (C-5), 130.2 (C Ar), 127.3 (2 x CH Ar), 125.9 (C-4), 114.1 (2 x CH Ar), 55.4 (OMe), 34.0 (C-3), 28.1 (C-2). **HRMS** (CI): calculated for C<sub>12</sub>H<sub>14</sub>O<sub>3</sub> [M]<sup>+</sup> requires  $m/z$  206.0943, found  $m/z$  206.0947.

## 8. Screening of reaction conditions for the cyclisation of 1a to 3a.

**a) Solvent Screening:** A range of different solvent and solvent ratios were examined for the model reaction.

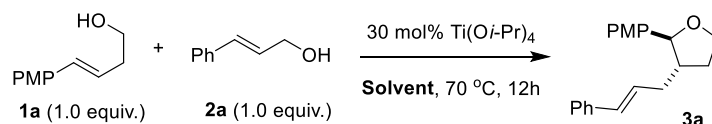

| Entry | Solvent<br>(10 mL/mmol of <b>1a</b> ) | Yield <b>3a</b> |
|-------|---------------------------------------|-----------------|
| 1     | HFIP                                  | 52%             |
| 2     | TFE                                   | Trace           |
| 3     | Nonafluoro-tert-butyl alcohol         | 20%             |
| 4     | Perfluoro-2-butyltetrahydrofuran      | 0%              |
| 5     | CHCl <sub>3</sub>                     | 0%              |
| 6     | DCM                                   | 0%              |
| 7     | Toluene                               | 0%              |
| 8     | Et <sub>2</sub> O                     | 0%              |
| 9     | EtOAc                                 | 0%              |
| 10    | MeCN                                  | 0%              |
| 11    | THF                                   | 0%              |
| 12    | IPA                                   | 0%              |
| 13    | MeOH                                  | 0%              |
| 14    | <sup>t</sup> BuOH                     | 0%              |
| 15    | DMF                                   | 0%              |
| 16    | DCM:HFIP 1:1                          | 40%             |
| 17    | DCM:HFIP 3:1                          | 30%             |
| 18    | DCM:HFIP 1:3                          | 50%             |

Screening of different solvents

**b) Initiator Screening** A range of different initiators were examined for the model reaction.

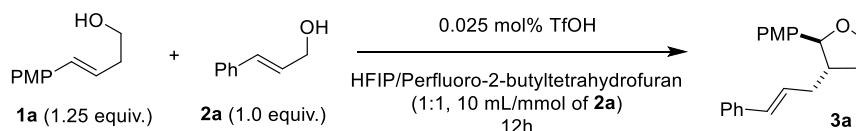

| Entry | Temperature | Yield <b>3a</b> |
|-------|-------------|-----------------|
| 1     | r.t.        | 0%              |
| 2     | 70 °C       | 0%              |

See ref. 28

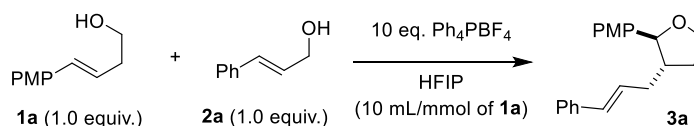

| Entry           | Loading  | Temperature | Time   | Yield <b>3a</b> |
|-----------------|----------|-------------|--------|-----------------|
| 1 <sup>a</sup>  | 10.0 eq. | 0°C         | 5 min. | 0%              |
| 2 <sup>b</sup>  | 10.0 eq. | 0°C         | 12 h   | 35%             |
| 3 <sup>a</sup>  | 10.0 eq. | r.t.        | 5 min. | 17%             |
| 4 <sup>b</sup>  | 10.0 eq. | r.t.        | 12 h   | 41%             |
| 5 <sup>a</sup>  | 10.0 eq. | 40 °C       | 5 min. | 22%             |
| 6 <sup>b*</sup> | 10.0 eq. | 40 °C       | 12 h   | 45%             |
| 7 <sup>c*</sup> | 0.3 eq.  | 70 °C       | 12 h   | 47%             |
| 8 <sup>c*</sup> | 1.0 eq.  | 70 °C       | 12 h   | 48%             |

\* Complete consumption of both **1a** and **2a**

<sup>a</sup> addition of alcohols into the solution of  $\text{Ph}_4\text{BF}_4$  via syringe pump over 5 min.

<sup>b</sup> addition of alcohols into the solution of  $\text{Ph}_4\text{BF}_4$  via syringe pump over 5 min. and then the reaction was stirred for 12 hours

<sup>c</sup> alcohols and  $\text{Ph}_4\text{BF}_4$  were added simultaneously in one portion, and then the reaction was stirred for 12 hours

See ref. 29

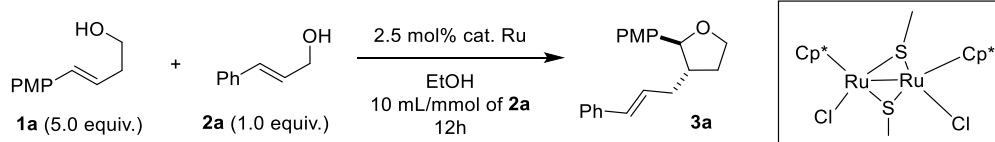

| Entry | Temperature | Yield <b>3a</b> |
|-------|-------------|-----------------|
| 1     | 0°C         | 0%              |
| 2     | r.t.        | 0%              |
| 3     | 70 °C       | 0%              |

See ref. 30

### 8.1. General procedure for the cyclization using alcohols as alkylating agents

To a microwave vial charged with a stirring bar, 1.0 eq. of alcohol **A**, 1.0 eq. of alcohol **B** and HFIP (10 mL/mmol of **A**) was added under argon. After fully dissolving the substrate, 30 mol%  $\text{Ti}(\text{O}^i\text{Pr})_4$  was added. The reaction was stirred for 12 hours at 70°C. Then the solvent was removed under vacuum. The residue was purified by silica gel column chromatography to give the corresponding heterocycle.

## 8.2. (±)-(2*S*,3*S*)-3-Cinnamyl-2-(4-methoxyphenyl)tetrahydrofuran (**3a**)

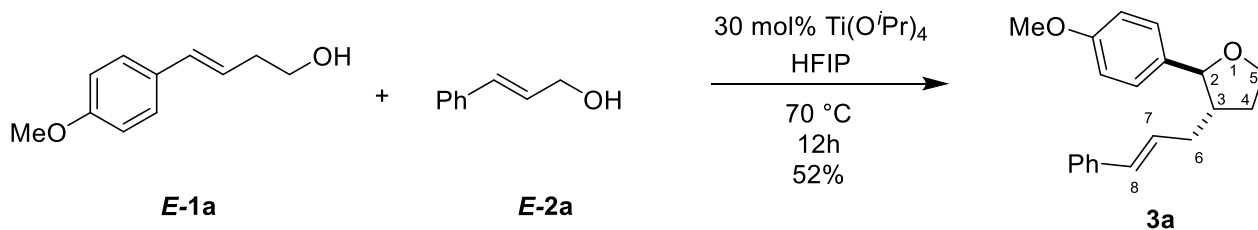

Alcohol **E-1a** (45.6 mg, 0.256 mmol), cinnamyl alcohol **E-2a** (31.8 mg, 0.256 mmol) and  $\text{Ti}(\text{O}^i\text{Pr})_4$  (21.8 mg, 0.0767 mmol) were subjected to the general procedure (FCC: gradient elution: 12%  $\rightarrow$  20%  $\text{Et}_2\text{O}$  - pentane) to yield **3a** as a colorless oil (39.0 mg, 52%).

Data for **3a**:  $R_f$  0.50 (50%  $\text{Et}_2\text{O}$  - pentane).  $^1\text{H}$  NMR (500 MHz,  $\text{CDCl}_3$ )  $\delta$  7.26-7.31 (6H, m, Ar), 7.18-7.23 (1H, m, Ar), 6.89 (2H, d,  $J = 8.7$  Hz, Ar), 6.41 (1H, d,  $J = 15.7$  Hz, 8-H), 6.14 (1H, dt,  $J = 15.8, 7.0$  Hz, 7-H), 4.43 (1H, d,  $J = 7.2$  Hz, 2-H), 4.12 (1H, q,  $J = 7.2$  Hz, 5- $\text{H}_A$ ), 4.02 (1H, td,  $J = 8.3, 4.6$  Hz, 5- $\text{H}_B$ ), 3.81 (3H, s, OMe), 2.40-2.48 (1H, m, 6- $\text{H}_A$ ), 2.22-2.29 (2H, m, 6- $\text{H}_B$  and 4- $\text{H}_A$ ), 2.22-2.15 (1H, m, 3-H), 1.82 (1H, dq,  $J = 11.3, 7.7$  Hz, 4- $\text{H}_B$ ).  $^{13}\text{C}$  NMR (125 MHz,  $\text{CDCl}_3$ )  $\delta$  159.2 (C Ar), 137.6 (C Ar), 134.3 (C Ar), 131.5 (C-8), 128.6 (2 x C-H Ar), 128.6 (C-7), 127.8 (2 x C-H Ar), 127.2 (C-H Ar), 126.1 (2 x C-H Ar), 113.9 (2 x C-H Ar), 86.0 (C-2), 68.0 (C-5), 55.4 (OMe), 48.0 (C-3), 35.6 (C-6), 32.5 (C-4). HRMS (ESI): calculated for  $\text{C}_{20}\text{H}_{23}\text{O}_2$   $[\text{M}+\text{H}]^+$  requires  $m/z$  295.16926, found  $m/z$  295.16925. IR (film)  $\nu_{\text{max}}$ : 2930, 1512, 1244, 1031, 827, 692  $\text{cm}^{-1}$ .

## 8.3. (±)-(2*S*,3*S*)-2-(4-Methoxyphenyl)-3-[(2'*E*)-3'-(4-methoxyphenyl)allyl]tetrahydrofuran (**3b**)

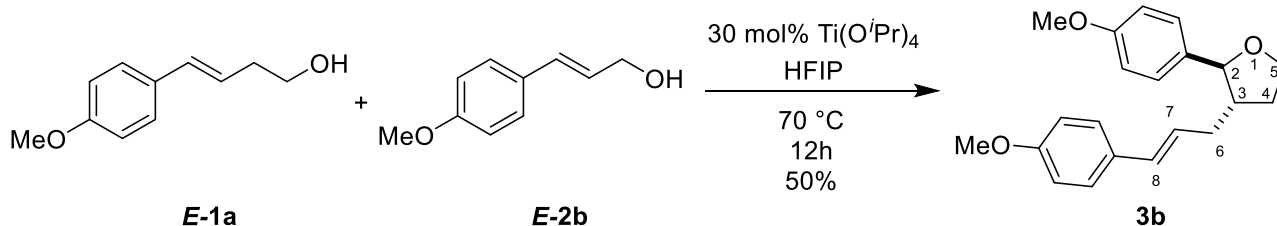

Alcohols **E-1a** (20.0 mg, 0.112 mmol) and **E-2b** (16.6 mg, 0.112 mmol) and  $\text{Ti}(\text{O}^i\text{Pr})_4$  (9.5 mg, 0.034 mmol) were subjected to the general procedure (FCC: gradient elution: 10%  $\rightarrow$  20%  $\text{Et}_2\text{O}$  - pentane) to yield **3b** as a colorless oil (18.1 mg, 50%).

Data for **3b**:  $R_f$  0.50 (50%  $\text{Et}_2\text{O}$  - pentane).  $^1\text{H}$  NMR (500 MHz,  $\text{CDCl}_3$ )  $\delta$  7.27 (2H, d,  $J = 8.6$  Hz, Ar), 7.22 (2H, d,  $J = 8.8$  Hz, Ar), 6.87 (2H, d,  $J = 8.7$  Hz, Ar), 6.82 (2H, d,  $J = 8.8$  Hz, Ar), 6.34 (1H, d,  $J = 15.8$  Hz, 8-H), 5.97 (1H, dt,  $J = 15.8, 7.0$  Hz, 7-H), 4.41 (1H, d,  $J = 7.2$  Hz, 2-H), 4.10 (1H, q,  $J = 7.2$  Hz, 5- $\text{H}_A$ ), 4.00 (1H, td,  $J = 8.3, 4.7$  Hz, 5- $\text{H}_B$ ), 3.90 (6H, s, 2 x OMe), 2.37-2.44 (1H, m, 6- $\text{H}_A$ ), 2.13-2.26 (3H, m, 3-H, 4- $\text{H}_A$  and 6- $\text{H}_B$ ), 1.75-1.84 (1H, m, 4- $\text{H}_B$ ).  $^{13}\text{C}$  NMR

(125 MHz, CDCl<sub>3</sub>)  $\delta$  159.1 (C Ar), 158.8 (C Ar), 134.3 (C Ar), 130.7 (C-8), 130.3 (C Ar), 127.6 (2 x CH Ar), 127.1 (2 x CH Ar), 126.2 (C-7), 113.9 (2 x CH Ar), 113.8 (2 x CH Ar), 85.8 (C-2), 67.8 (C-5), 55.3 (2 x OMe), 48.0 (C-3), 35.5 (C-6), 32.4 (C-4). **NOESY- 2D (500 MHz, CDCl<sub>3</sub>):** between 2-H and 6-H<sub>A</sub>, between 2-H and 7-H. **HRMS (EI):** calculated for C<sub>21</sub>H<sub>24</sub>O<sub>3</sub> [M]<sup>+</sup> requires  $m/z$  324.1725, found  $m/z$  324.1720. **IR (film)**  $\nu_{\max}$ : 2980, 1608, 1511, 1247, 1173, 1033 cm<sup>-1</sup>.

#### 8.4. (±)-(2*S*,3*S*)-3-(4-Methoxybenzyl)-2-(4-methoxyphenyl)tetrahydrofuran (**3c**)

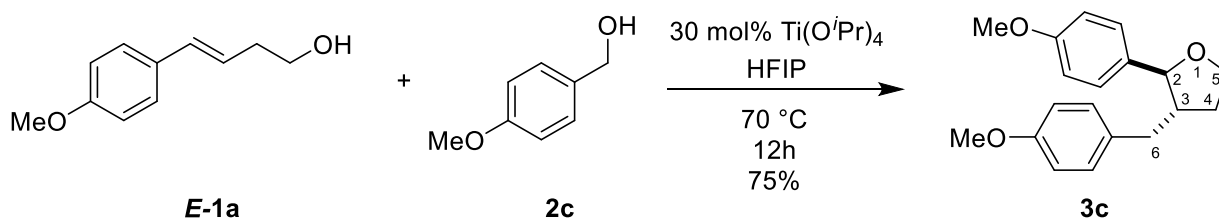

Alcohol **E-1a** (42.5 mg, 0.239 mmol), 4-methoxybenzyl alcohol **2c** (33.0 mg, 0.239 mmol) and Ti(O<sup>*i*</sup>Pr)<sub>4</sub> (20.3 mg, 0.0715 mmol) were subjected to the general procedure (FCC: gradient elution: 10% → 14% Et<sub>2</sub>O - pentane) to yield **3c** as a yellow oil (53.4 mg, 75%).

Data for **3c**: **R<sub>f</sub>** 0.50 (60% Et<sub>2</sub>O - pentane). **<sup>1</sup>H NMR (400 MHz, CDCl<sub>3</sub>)**  $\delta$  7.24 (2H, d,  $J$  = 8.9 Hz, Ar), 7.05 (2H, d,  $J$  = 8.6 Hz, Ar), 6.88 (2H, d,  $J$  = 8.8 Hz, Ar), 6.81 (2H, d,  $J$  = 8.6 Hz, Ar), 4.45 (1H, d,  $J$  = 7.6 Hz, 2-H), 4.06 (1H, q,  $J$  = 8.4 Hz, 5-H<sub>A</sub>), 4.01 (1H, td,  $J$  = 8.6, 4.9 Hz, 5-H<sub>B</sub>), 3.81 (3H, s, OMe), 3.78 (3H, s, OMe), 2.80 (1H, dd,  $J$  = 13.6, 5.1 Hz, 6-H<sub>A</sub>), 2.51 (1H, dd,  $J$  = 13.6, 9.7 Hz, 6-H<sub>B</sub>), 2.25-2.36 (1H, m, 3-H), 2.00-2.10 (1H, m, 4-H<sub>A</sub>), 1.71-1.82 (1H, m, 4-H<sub>B</sub>). **<sup>13</sup>C NMR (100 MHz, CDCl<sub>3</sub>)**  $\delta$  159.1 (C Ar), 158.0 (C Ar), 134.4 (C Ar), 132.6 (C Ar), 129.8 (2 x CH Ar), 127.6 (2 x CH Ar), 113.9 (2 x CH Ar), 113.8 (2 x CH Ar), 85.8 (C-2), 67.9 (C-5), 55.4 (OMe), 55.3 (OMe), 50.0 (C-3), 37.3 (C-6), 32.4 (C-4). **NOESY- 2D (500 MHz, CDCl<sub>3</sub>):** between 2-H and 6-H<sub>A</sub>, between 2-H and 6-H<sub>B</sub>. **HRMS (ESI):** calculated for C<sub>19</sub>H<sub>22</sub>O<sub>3</sub>Na [M+Na]<sup>+</sup> requires  $m/z$  321.14612, found  $m/z$  321.14609. **IR (film)**  $\nu_{\max}$ : 2916, 1611, 1510, 1241, 1030, 828 cm<sup>-1</sup>.

#### 8.5. (±)-(2*S*,3*R*)-3-Benzhydryl-2-(4-methoxyphenyl)tetrahydrofuran (**3d**)

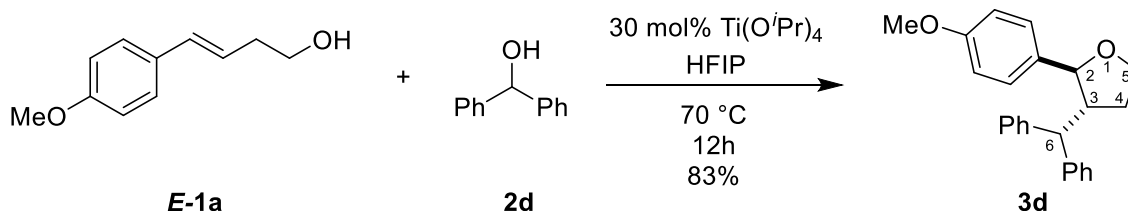

Alcohol **E-1a** (19.8 mg, 0.111 mmol), diphenylmethanol **2d** (20.5 mg, 0.111 mmol) and Ti(O<sup>*i*</sup>Pr)<sub>4</sub> (9.5 mg, 0.033 mmol) were subjected to the general procedure (FCC: gradient elution: 10% → 20% Et<sub>2</sub>O - pentane) to yield **3d** as a yellow foam (31.2 mg, 83%).

Data for **3d**:  $R_f$  0.50 (40% Et<sub>2</sub>O - pentane).  $^1\text{H}$  NMR (400 MHz, CDCl<sub>3</sub>)  $\delta$  7.16-7.25 (4H, m, Ar), 7.06-7.15 (5H, m, Ar), 7.01-7.06 (1H, m, Ar), 6.79 (2H, d,  $J$  = 8.4 Hz, Ar), 6.63 (2H, d,  $J$  = 8.3 Hz, Ar), 4.55 (1H, d,  $J$  = 4.3 Hz, 2-H), 4.06 (1H, td,  $J$  = 8.3, 4.5 Hz, 5-H<sub>A</sub>), 3.91 (1H, q,  $J$  = 7.9 Hz, 5-H<sub>B</sub>), 3.84 (1H, d,  $J$  = 11.5 Hz, 6-H), 3.68 (3H, s, OMe), 3.03 (1H, ddt,  $J$  = 12.1, 8.4, 4.4 Hz, 3-H), 2.00-2.12 (1H, m, 4-H<sub>A</sub>), 1.65 (1H, ddt,  $J$  = 11.8, 7.9, 4.5 Hz, 4-H<sub>B</sub>).  $^{13}\text{C}$  NMR (100 MHz, CDCl<sub>3</sub>)  $\delta$  144.1 (C Ar), 143.6 (C Ar), 135.7 (C Ar), 128.7 (2 x C-H Ar), 128.6 (2 x C-H Ar), 128.5 (2 x C-H Ar), 128.2 (2 x C-H Ar), 127.2 (2 x C-H Ar), 126.6 (CH Ar), 126.5 (CH Ar), 125.6 (C Ar), 113.6 (2 x C-H Ar), 84.7 (C-2), 67.8 (C-5), 55.7 (C-6), 55.4 (OMe), 51.6 (C-3), 31.2 (C-4). HRMS (CI): calculated for C<sub>24</sub>H<sub>24</sub>O<sub>2</sub>Na [M+Na]<sup>+</sup> requires  $m/z$  367.16685, found  $m/z$  367.16638. IR (film)  $\nu_{\text{max}}$ : 3656, 2980, 1492, 1239, 954, 750 cm<sup>-1</sup>.

#### 8.6. (±)-(2*S*,3*S*)-2-(4-Methoxyphenyl)-3-(3-methylbut-2-en-1-yl)tetrahydrofuran (**3e**)

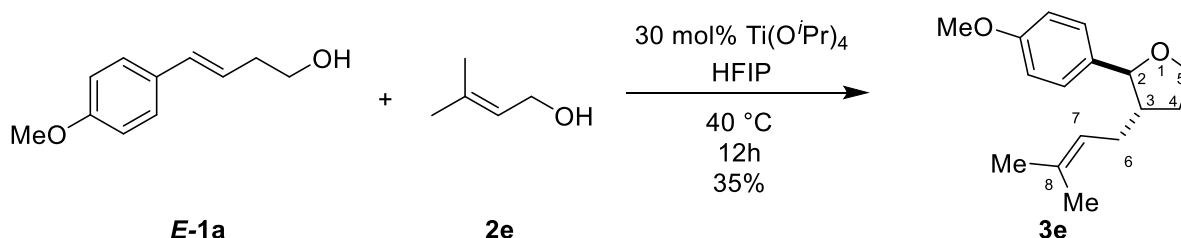

Alcohol **E-1a** (21.1 mg, 0.119 mmol), 3-methyl-2-buten-1-ol **2e** (0.03 mL, 0.3 mmol) and Ti(O<sup>*i*</sup>Pr)<sub>4</sub> (10.1 mg, 0.0356 mmol) were subjected to the general procedure except using 2.0 eq. of 3-methyl-2-buten-1-ol and conducting the reaction at 40°C (FCC: gradient elution: 5% → 10% Et<sub>2</sub>O - pentane) to yield **3e** as a colorless oil (10.3 mg, 35%).

Data for **3e**:  $R_f$  0.40 (30% Et<sub>2</sub>O - pentane).  $^1\text{H}$  NMR (500 MHz, CDCl<sub>3</sub>)  $\delta$  7.24 (2H, d,  $J$  = 8.6 Hz, Ar), 6.87 (2H, d,  $J$  = 8.7 Hz, Ar), 5.08 (1H, t,  $J$  = 7.1 Hz, 7-H), 4.37 (1H, d,  $J$  = 7.3 Hz, 2-H), 4.07 (1H, q,  $J$  = 8.3 Hz, 5-H<sub>A</sub>), 3.98 (1H, td,  $J$  = 8.3, 5.0 Hz, 5-H<sub>B</sub>), 3.80 (3H, s, OMe), 2.11-2.23 (2H, m, 4-H<sub>A</sub> and 6-H<sub>A</sub>), 1.98-2.10 (2H, m, 3-H and 6-H<sub>B</sub>), 1.69-1.76 (1H, m, 4-H<sub>B</sub>), 1.67 (3H, s, Me), 1.58 (3H, s, Me).  $^{13}\text{C}$  NMR (125 MHz, CDCl<sub>3</sub>)  $\delta$  159.1 (C Ar), 134.7 (C Ar), 132.9 (C-8), 127.6 (2 x C-H Ar), 122.4 (C-7), 113.8 (2 x C-H Ar), 85.8 (C-2), 68.0 (C-5), 55.4 (OMe), 48.4 (C-3), 32.5 (C-4), 30.4 (C-6), 25.9 (Me), 18.0 (Me). HRMS (ESI): calculated for C<sub>16</sub>H<sub>23</sub>O<sub>2</sub> [M+H]<sup>+</sup> requires  $m/z$  247.16926, found  $m/z$  247.16937. IR (film)  $\nu_{\text{max}}$ : 2980, 2360, 2341, 1513, 1380, 1246 cm<sup>-1</sup>.

**8.7. (±)-(2*S*,3*S*)-2-(4-Methoxyphenyl)-3-[(2'*E*,4'*E*)-penta-2,4-dien-1-yl]tetrahydrofuran (3f)**

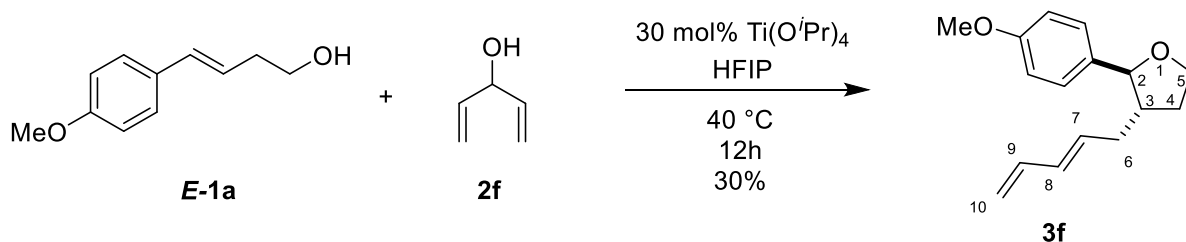

Alcohol **E-1a** (40.0 mg, 0.225 mmol), 1,4-pentadien-3-ol **2f** (0.05 mL, 0.6 mmol) and  $\text{Ti}(\text{O}^i\text{Pr})_4$  (19.1 mg, 0.0673 mmol) were subjected to the general procedure except using 2.0 eq. of 1,4-pentadien-3-ol and conducting the reaction at 40°C (FCC: gradient elution: 7% → 10%  $\text{Et}_2\text{O}$  - pentane) to yield **3f** as a colorless oil (16.5 mg, 30%).

Data for **3f**:  $R_f$  0.40 (30%  $\text{Et}_2\text{O}$  - pentane).  $^1\text{H}$  NMR (500 MHz,  $\text{CDCl}_3$ )  $\delta$  7.24 (2H, d,  $J$  = 8.5 Hz, Ar), 6.88 (2H, d,  $J$  = 8.5 Hz, Ar), 6.27 (1H, dt,  $J$  = 16.9, 10.2 Hz, 9-H), 6.06 (1H, dd,  $J$  = 15.2, 10.4 Hz, 8-H), 5.62 (1H, dt,  $J$  = 14.3, 6.8 Hz, 7-H), 5.10 (1H, d,  $J$  = 17.0 Hz, 10- $\text{H}_A$ ), 4.98 (1H, d,  $J$  = 10.1 Hz, 10- $\text{H}_B$ ), 4.36 (1H, d,  $J$  = 6.7 Hz, 2-H), 4.08 (1H, q,  $J$  = 8.6 Hz, 5- $\text{H}_A$ ), 3.98 (1H, td,  $J$  = 8.2, 4.9 Hz, 5- $\text{H}_B$ ), 3.80 (3H, s, OMe), 2.26-2.35 (1H, m, 6- $\text{H}_A$ ), 2.14-2.24 (1H, m, 4- $\text{H}_A$ ), 2.05-2.14 (2H, m, 3-H and 6- $\text{H}_B$ ), 1.68-1.79 (1H, m, 4- $\text{H}_B$ ).  $^{13}\text{C}$  NMR (125 MHz,  $\text{CDCl}_3$ )  $\delta$  159.2 (C Ar), 137.1 (C-9), 134.3 (C Ar), 132.7 (C-7), 132.6 (C-8), 127.7 (2 x CH Ar), 115.6 (C-10), 113.9 (2 x CH Ar), 85.9 (C-2), 67.9 (C-5), 55.4 (OMe), 47.8 (C-3), 35.1 (C-6), 32.4 (C-4). HRMS (CI): calculated for  $\text{C}_{16}\text{H}_{21}\text{O}_2\text{Na}$   $[\text{M}+\text{H}]^+$  requires  $m/z$  245.15361, found  $m/z$  245.15364. IR (film)  $\nu_{\text{max}}$ : 2980, 2360, 1513, 1381, 1246, 1072  $\text{cm}^{-1}$ .

**8.8. (±)-(2*S*, 3*R*)-3-[(1'*S*,2'*E*)-1,3-Diphenylallyl]-2-(4-methoxyphenyl)tetrahydrofuran and**

**(±)-(2*S*, 3*S*)-3-[(1'*R*,2'*E*)-1,3-Diphenylallyl]-2-(4-methoxyphenyl)tetrahydrofuran (**3g**)**

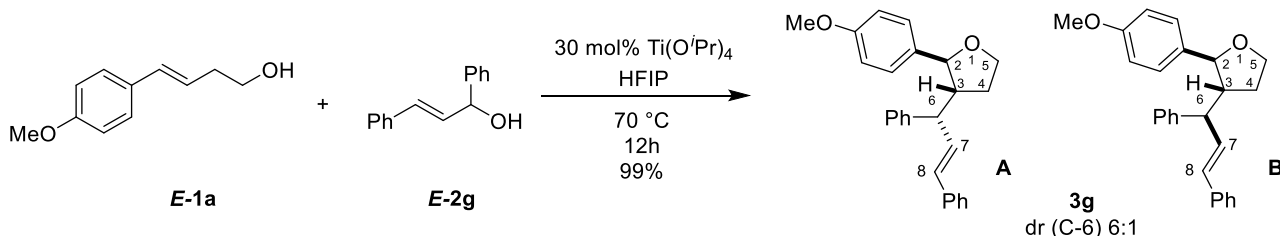

Alcohol **E-1a** (42.4 mg, 0.238 mmol), *trans*-1,3-diphenyl-2-propen-1-ol **E-2g** (20.0 mg, 0.238 mmol) and  $\text{Ti}(\text{O}^i\text{Pr})_4$  (20.0 mg, 0.0704 mmol) were subjected to the general procedure (FCC: 15%  $\text{Et}_2\text{O}$  - pentane) to yield an inseparable 6:1 mixture of diastereomers **3g** as a colorless oil (87.1 mg, 99%).

Data for **major diastereomer A of 3g (from the mixture)**:  $R_f$  0.40 (40% Et<sub>2</sub>O - pentane).

**<sup>1</sup>H NMR (500 MHz, CDCl<sub>3</sub>)**  $\delta$  7.31-7.36 (2H, m, Ar), 7.15-7.29 (10H, m, Ar), 6.84 (2H, d,  $J$  = 8.7 Hz, Ar), 6.45 (1H, d,  $J$  = 15.7 Hz, 8-H), 6.12 (1H, dd,  $J$  = 15.7, 9.2 Hz, 7-H), 4.78 (1H, d,  $J$  = 6.0 Hz, 2-H), 4.11 (1H, td,  $J$  = 7.9, 5.8 Hz, 5-H<sub>A</sub>), 3.96 (1H, dt,  $J$  = 8.4, 7.1 Hz, 5-H<sub>B</sub>), 3.80 (3H, s, OMe), 3.49 (1H, t,  $J$  = 9.6 Hz, 6-H), 2.73 (1H, ddt,  $J$  = 10.3, 8.0, 6.1 Hz, 3-H), 1.96-2.08 (1H, m, 4-H<sub>A</sub>), 1.72 (1H, ddt,  $J$  = 12.3, 7.6, 6.0 Hz, 4-H<sub>B</sub>). **<sup>13</sup>C NMR (125 MHz, CDCl<sub>3</sub>)**  $\delta$  159.0 (C Ar), 143.4 (C Ar), 137.2 (C Ar), 135.20 (C Ar), 133.0 (C-7), 130.4 (C-8), 128.8 (2 x C-H Ar), 128.5 (2 x C-H Ar), 128.3 (2 x C-H Ar), 128.0 (2 x C-H Ar), 127.3 (C-H Ar), 126.7 (C-H Ar), 126.4 (2 x C-H Ar), 113.9 (2 x C-H Ar), 84.9 (C-2), 67.92 (C-5), 55.39 (OMe), 53.7 (C-6), 52.5 (C-3), 31.5 (C-4). **HRMS (CI)**: calculated for C<sub>26</sub>H<sub>25</sub>O<sub>2</sub> [M-H]<sup>+</sup> requires  $m/z$  369.18491, found  $m/z$  369.18475. **IR** (film)  $\nu_{max}$ : 2979, 1511, 1451, 1244, 1030, 694 cm<sup>-1</sup>.

Partial data for **minor diastereomer B of 3g (from the mixture)**: **<sup>1</sup>H NMR (500 MHz, CDCl<sub>3</sub>)**  $\delta$  7.36-7.39 (2H, m, Ar), 7.15-7.29 (8H, m, Ar), 6.95 (2H, d,  $J$  = 8.7 Hz, Ar), 6.77 (2H, d,  $J$  = 8.7 Hz, Ar), 6.49 (1H, d,  $J$  = 15.8 Hz, 8-H), 6.42 (1H, dd,  $J$  = 15.7, 8.7 Hz, 7-H), 4.60 (1H, d,  $J$  = 5.7 Hz, 2-H), 4.17 (1H, td,  $J$  = 8.0, 5.5 Hz, 5-H<sub>A</sub>), 4.03 (1H, dt,  $J$  = 8.6, 7.3 Hz, 5-H<sub>B</sub>), 3.79 (3H, s, OMe), 3.49 (1H, t,  $J$  = 9.6 Hz, 6-H), 2.66-2.69 (1H, m, 3-H), 2.15-2.19 (1H, m, 4-H<sub>A</sub>), 2.06-2.12 (1H, m, 4-H<sub>B</sub>). **<sup>13</sup>C NMR (125 MHz, CDCl<sub>3</sub>)**  $\delta$  158.8 (C Ar), 143.0 (C Ar), 137.3 (C Ar), 135.15 (C Ar), 131.6 (C-7), 131.3 (C-8), 128.7 (2 x C-H Ar), 128.6 (2 x C-H Ar), 128.3 (2 x C-H Ar), 128.2 (2 x C-H Ar), 127.5 (C-H Ar), 127.3 (C-H Ar), 126.3 (2 x C-H Ar), 113.7 (2 x C-H Ar), 84.1 (C-2), 67.87 (C-5), 55.36 (OMe), 53.9 (C-6), 52.0 (C-3), 30.2 (C-4).

## 8.9. (±)-(2*S*, 3*S*)-2-(4-Methoxyphenyl)-3-[(1'*S*, 2'*E*)-pent-3-en-2-yl]tetrahydrofuran and (±)-(2*S*, 3*R*)-2-(4-methoxyphenyl)-3-[(1'*R*, 2'*E*)-pent-3-en-2-yl]tetrahydrofuran (**3h**)

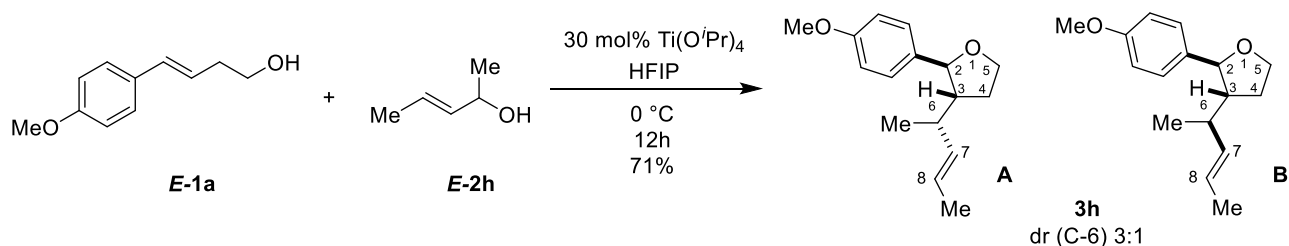

Alcohols **E-1a** (59.3 mg, 0.334 mmol) *trans*-3-penten-2-ol **E-2h** (57.4 mg, 0.668 mmol) and Ti(O<sup>*i*</sup>Pr)<sub>4</sub> (28.0 mg, 0.100 mmol) were subjected to the general procedure except using 2 eq. of **E-2h** and conducting the reaction at 0°C (FCC: gradient elution: 4% → 10% Et<sub>2</sub>O - pentane) to yield an inseparable 3:1 mixture of diastereomer **3h** as a colorless oil (58.3 mg, 71%).

Data for **major diastereomer A of 3h (from the mixture)**:  $R_f$  0.40 (25% Et<sub>2</sub>O - pentane). **<sup>1</sup>H NMR (400 MHz, CDCl<sub>3</sub>)**  $\delta$  7.20 (2H, d,  $J$  = 8.6 Hz, Ar), 6.85 (2H, d,  $J$  = 8.8 Hz, Ar), 5.33-5.43 (1H, m, 7-H), 5.12 (1H, dqd,  $J$  = 15.2, 8.4, 1.6 Hz, 8-H), 4.54 (1H, d,  $J$  = 6.7 Hz, 2-H), 4.05 (1H, q,  $J$  = 8.2 Hz, 5-H<sub>A</sub>), 3.91 (1H, td,  $J$  = 8.0, 5.4 Hz, 5-H<sub>B</sub>), 3.79 (3H, s, OMe), 2.14-2.23 (1H, m, 6-H),



2.07-2.14 (1H, m, 4-H<sub>A</sub>), 1.99-2.07 (1H, m, 3-H), 1.75-1.85 (1H, m, 4-H<sub>B</sub>), 1.57 (3H, dd,  $J = 4.7$ , 1.5 Hz, Me), 0.99 (3H, d,  $J = 6.7$  Hz, Me). **<sup>13</sup>C NMR (100 MHz, CDCl<sub>3</sub>)**  $\delta$  158.9 (C Ar), 136.2 (C-8), 133.8 (C Ar), 128.2 (2 x CH Ar), 124.2 (C-7), 113.7 (2 x CH Ar), 84.3 (C-2), 68.1 (C-5), 55.4 (OMe), 53.0 (C-3), 39.8 (C-6), 30.7 (C-4), 19.0 (Me), 17.9 (Me). **HRMS** (Cl): calculated for C<sub>16</sub>H<sub>23</sub>O<sub>2</sub> [M+H]<sup>+</sup> requires  $m/z$  247.16926, found  $m/z$  247.16933. **IR** (film)  $\nu_{\text{max}}$ : 3657, 2980, 2888, 1512, 1381, 1245 cm<sup>-1</sup>.

Partial data for **minor diastereomer B of 3h (from the mixture)**: **<sup>1</sup>H NMR (400 MHz, CDCl<sub>3</sub>)**  $\delta$  7.25 (2H, d,  $J = 8.7$  Hz, Ar), 6.87 (2H, d,  $J = 8.8$  Hz, Ar), 5.41-5.52 (1H, m, 7-H), 5.31-5.40 (1H, m, 8-H), 4.49 (1H, d,  $J = 7.3$  Hz, 2-H), 4.03 (1H, q,  $J = 7.1$  Hz, 5-H<sub>A</sub>), 3.90 (1H, td,  $J = 8.2$ , 4.8 Hz, 5-H<sub>B</sub>), 3.80 (3H, s, OMe), 2.14-2.23 (1H, m, 6-H), 2.07-2.14 (1H, m, 4-H<sub>A</sub>), 1.99-2.07 (1H, m, 3-H), 1.75-1.85 (1H, m, 4-H<sub>B</sub>), 1.69 (3H, dd,  $J = 6.2$ , 1.5 Hz, Me), 0.95 (3H, d,  $J = 6.9$  Hz, Me). **<sup>13</sup>C NMR (100 MHz, CDCl<sub>3</sub>)**  $\delta$  158.9 (C Ar), 135.2 (C Ar), 133.8 (C-8), 127.9 (2 x CH Ar), 125.7 (C-7), 133.9 (2 x CH Ar), 84.0 (C-2), 68.0 (C-5), 55.4 (OMe), 53.2 (C-3), 37.7 (C-6), 29.2 (C-4), 20.5 (Me), 18.2 (Me).

**8.10. (±)-(2*S*, 3*S*)-2-(4-Methoxyphenyl)-3-[(1'*S*, 2'*E*)-4-phenylbut-3-en-2-yl]tetrahydrofuran, (±)-(2*S*, 3*R*)-2-(4-methoxyphenyl)-3-[(1'*R*, 2'*E*)-4-phenylbut-3-en-2-yl]tetrahydrofuran, (2*S*,3*R*)-2-(4-methoxyphenyl)-3-[(1'*S*, 2'*E*)-1-phenylbut-2-en-1-yl]tetrahydrofuran and (2*S*,3*R*)-2-(4-methoxyphenyl)-3-[(1'*R*, 2'*E*)-1-phenylbut-2-en-1-yl]tetrahydrofuran (**3i**)**

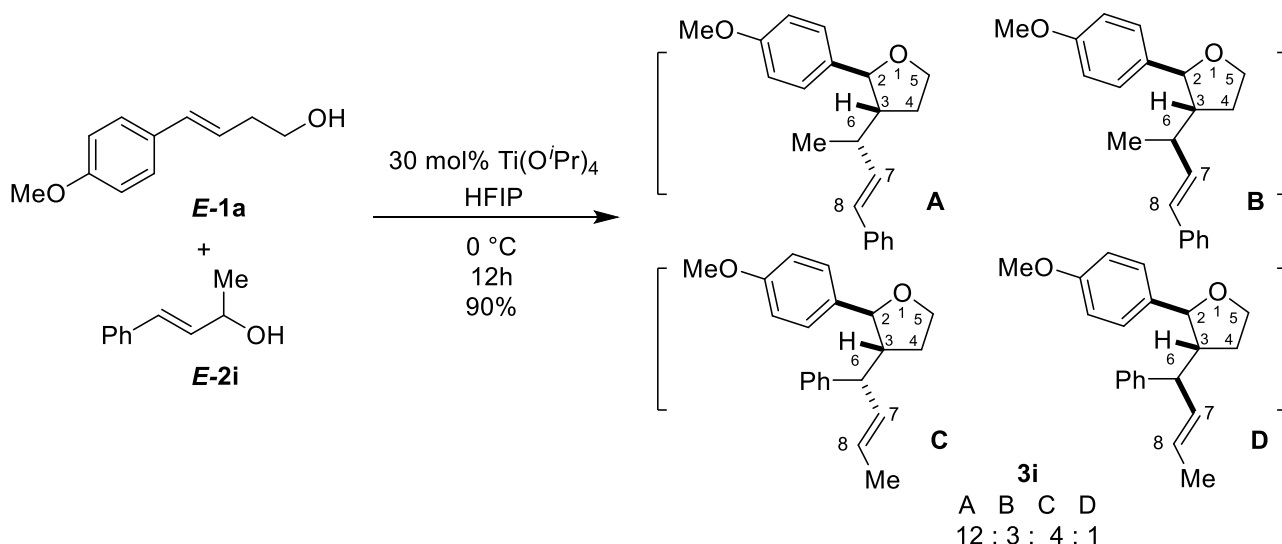

Alcohols **E-1a** (33.9 mg, 0.190 mmol), **E-2i** (28.2 mg, 0.190 mmol) and Ti(O<sup>*i*</sup>Pr)<sub>4</sub> (16.2 mg, 0.0570 mmol) were subjected to the general procedure except conducting the reaction at 0 °C (FCC: 10% Et<sub>2</sub>O - pentane) to yield **3i** as 4:1 dr mixture of **diastereomer A, B, C** and **D** (52.8 mg, 90%), which was partially separable into 2 clean fractions: first fraction of mixture of 13:1 **diastereomer A** and **B** (25.0 mg, 47%) as a colorless oil, and second fraction of mixture of 2:1 **diastereomer C** and

**D** as a colorless oil (10.0 mg, 19%).

Data for **diastereomer A of 3i**:  $R_f$  0.45 (40% Et<sub>2</sub>O - pentane). **<sup>1</sup>H NMR (400 MHz, CDCl<sub>3</sub>)**  $\delta$  7.23-7.28 (2H, m, Ar), 7.15-7.22 (5H, m, Ar), 6.79 (2H, d,  $J$  = 8.7 Hz, Ar), 6.34 (1H, d,  $J$  = 15.8 Hz, 8-H), 5.84 (1H, dd,  $J$  = 15.8, 8.6 Hz, 7-H), 4.57 (1H, d,  $J$  = 6.8 Hz, 2-H), 4.05-4.12 (1H, m, 5-H<sub>A</sub>), 3.95 (1H, td,  $J$  = 8.2, 5.0 Hz, 5-H<sub>B</sub>), 3.76 (3H, s, OMe), 2.36-2.45 (1H, m, 6-H), 2.17-2.25 (2H, m, 3-H and 4-H<sub>A</sub>), 1.83-1.92 (1H, m, 4-H<sub>B</sub>), 1.13 (3H, d,  $J$  = 6.8 Hz, Me). **<sup>13</sup>C NMR (100 MHz, CDCl<sub>3</sub>)**  $\delta$  159.0 (C Ar), 137.58 (C Ar), 135.3 (C-8), 135.1 (C Ar), 129.0 (C-7), 128.5 (2 x CH Ar), 128.4 (CH Ar), 127.1 (2 x CH Ar), 126.2 (2 x CH Ar), 113.8 (2 x CH Ar), 84.6 (C-2), 68.1 (C-5), 55.40 (OMe), 53.3 (C-3), 40.6 (C-6), 31.1 (C-4), 19.2 (Me). **NOESY- 2D (400 MHz, CDCl<sub>3</sub>)**: between 2-H and 6-H, between 2-H and Me, between 2-H and 7-H, between 2-H and 8-H. **HRMS** (Cl): calculated for C<sub>21</sub>H<sub>25</sub>O<sub>2</sub> [M+H]<sup>+</sup> requires  $m/z$  309.18491, found  $m/z$  309.18491. **IR** (film)  $\nu_{max}$ : 2980, 2885, 2360, 1512, 1243, 964 cm<sup>-1</sup>.

Partial data **diastereomer B of 3i**: **<sup>1</sup>H NMR (400 MHz, CDCl<sub>3</sub>)**  $\delta$  7.14-7.38 (7H, m, Ar), 6.89 (2H, d,  $J$  = 8.6 Hz, Ar), 6.41 (1H, d,  $J$  = 15.8 Hz, 8-H), 6.16 (1H, dd,  $J$  = 15.8, 8.6 Hz, 7-H), 4.56 (1H, d,  $J$  = 7.4 Hz, 2-H), 4.05-4.12 (1H, m, 5-H<sub>A</sub>), 3.95 (1H, td,  $J$  = 8.2, 5.0 Hz, 5-H<sub>B</sub>), 3.81 (3H, s, OMe), 2.36-2.45 (1H, m, 6-H), 2.17-2.25 (2H, m, 3-H and 4-H<sub>A</sub>), 1.83-1.92 (1H, m, 4-H<sub>B</sub>), 1.08 (3H, d,  $J$  = 6.8 Hz, Me). **<sup>13</sup>C NMR (100 MHz, CDCl<sub>3</sub>)**  $\delta$  159.2 (C Ar), 137.64 (C Ar), 134.9 (C Ar), 133.2 (C-8), 130.4 (C-7), 129.0 (2 x CH Ar), 128.7 (2 x CH Ar), 128.0 (2 x CH Ar), 127.3 (CH Ar), 114.0 (2 x CH Ar), 84.1 (C-2), 68.0 (C-5), 55.43 (OMe), 53.2 (C-3), 38.4 (C-6), 29.8 (C-4), 20.2 (Me).

Data for **diastereomer C of 3i**:  $R_f$  0.50 (40% Et<sub>2</sub>O - pentane). **<sup>1</sup>H NMR (500 MHz, CDCl<sub>3</sub>)**  $\delta$  7.13-7.32 (7H, m, Ar), 6.87 (2H, d,  $J$  = 8.7 Hz, Ar), 5.52 (1H, dq,  $J$  = 15.2, 6.5 Hz, 8-H), 5.40 (1H, ddd,  $J$  = 15.1, 9.1, 1.5 Hz, 7-H), 4.72 (1H, d,  $J$  = 5.5 Hz, 2-H), 4.04 (1H, td,  $J$  = 8.2, 5.6 Hz, 5-H<sub>A</sub>), 3.89 (1H, dt,  $J$  = 8.5, 7.2 Hz, 5-H<sub>B</sub>), 3.81 (3H, s, OMe), 3.24-3.21 (1H, m, 6-H), 2.55 (1H, ddt,  $J$  = 10.7, 8.0, 5.6 Hz, 3-H), 1.91 (1H, dq,  $J$  = 12.7, 7.6 Hz, 4-H<sub>A</sub>), 1.57-1.65 (1H, m, 4-H<sub>B</sub>), 1.58 (3H, dd,  $J$  = 6.3, 1.6 Hz, Me). **<sup>13</sup>C NMR (125 MHz, CDCl<sub>3</sub>)**  $\delta$  158.9 (C Ar), 144.1 (C Ar), 135.7 (C Ar), 134.3 (C-7), 128.7 (2 x CH Ar), 128.1 (3 x CH Ar), 127.0 (CH Ar), 125.42 (C-8), 126.1 (CH Ar), 113.7 (2 x CH Ar), 84.7 (C-2), 67.90 (C-5), 55.44 (OMe), 53.4 (C-6), 52.3 (C-3), 31.1 (C-4), 18.0 (Me). **HRMS** (Cl): calculated for C<sub>21</sub>H<sub>25</sub>O<sub>2</sub> [M+H]<sup>+</sup> requires  $m/z$  309.18491, found  $m/z$  309.18512. **IR** (film)  $\nu_{max}$ : 2980, 2360, 1728, 1513, 1245, 1062 cm<sup>-1</sup>.

Partial data **diastereomer D of 3i**: **<sup>1</sup>H NMR (500 MHz, CDCl<sub>3</sub>)**  $\delta$  7.18-7.21 (3H, m, Ar), 7.08-7.11 (2H, m, Ar), 6.90 (2H, d,  $J$  = 9.1 Hz, Ar), 6.72 (2H, d,  $J$  = 8.7 Hz, Ar), 5.65 (1H, ddd,  $J$  = 15.1, 8.9, 1.6 Hz, 7-H), 5.52 (1H, dq,  $J$  = 15.2, 6.5 Hz, 8-H), 4.49 (1H, d,  $J$  = 5.9 Hz, 2-H), 4.10 (1H, td,  $J$  = 8.0, 5.7 Hz, 5-H<sub>A</sub>), 3.96 (1H, dt,  $J$  = 8.5, 7.2 Hz, 5-H<sub>B</sub>), 3.76 (3H, s, OMe), 3.24-3.27 (1H, m, 6-H), 2.45-2.51 (1H, m, 3-H), 2.09 (1H, dq,  $J$  = 12.5, 7.5 Hz, 4-H<sub>A</sub>), 2.00 (1H, ddt,  $J$  =

12.0, 7.5, 5.8 Hz, 4-H<sub>B</sub>), 1.69 (3H, dd,  $J = 6.3, 1.5$  Hz, Me). <sup>13</sup>C NMR (125 MHz, CDCl<sub>3</sub>)  $\delta$  158.7 (C Ar), 143.9 (C Ar), 135.4 (C Ar), 132.5 (C-7), 128.6 (2 x CH Ar), 127.9 (3 x CH Ar), 127.3 (2 x CH Ar), 125.39 (C-8), 113.6 (2 x CH Ar), 84.0 (C-2), 67.91 (C-5), 55.37 (OMe), 52.7 (C-3), 51.6 (C-6), 30.0 (C-4), 18.2 (Me).

**8.11. (±)-(2*S*,3*R*)-3-[(1'*R*)-Cyclohex-2-en-1-yl]-2-(4-methoxyphenyl)tetrahydrofuran and (±)-(2*S*,3*R*)-3-[(1'*S*)-cyclohex-2-en-1-yl]-2-(4-methoxyphenyl)tetrahydrofuran (**3j**)**

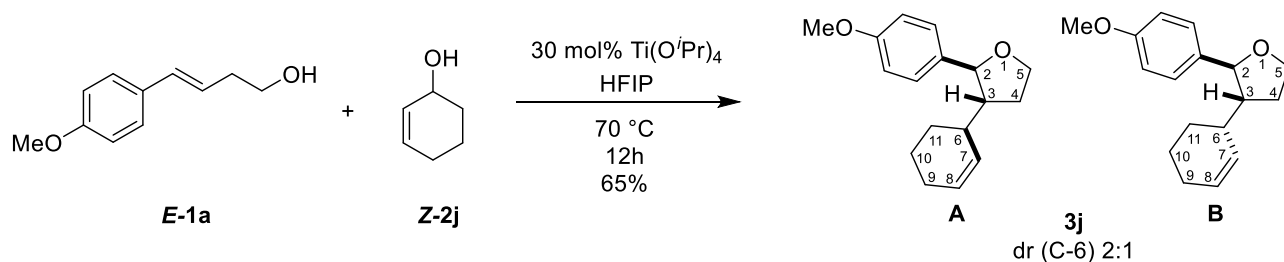

Alcohol **E-1a** (53.8 mg, 0.302 mmol) and **Z-2j** (29.6 mg, 0.302 mmol) and Ti(O<sup>*i*</sup>Pr)<sub>4</sub> (25.7 mg, 0.0905 mmol) were subjected to the general procedure (FCC: 6% Et<sub>2</sub>O - pentane) to yield an inseparable 2:1 mixture of diastereomer **3j** as a colorless oil (50.6 mg, 65%).

Data for **major diastereomer A of 3j (from the mixture)**: R<sub>f</sub> 0.50 (30% Et<sub>2</sub>O - pentane). <sup>1</sup>H NMR (400 MHz, CDCl<sub>3</sub>)  $\delta$  7.26 (2H, d,  $J = 8.3$  Hz, Ar), 6.87 (2H, d,  $J = 8.8$  Hz, Ar), 5.76-5.82 (1H, m, 8-H), 5.66-5.71 (1H, m, 7-H), 4.56 (1H, d,  $J = 7.5$  Hz, 2-H), 3.99-4.10 (1H, m, 5-H<sub>A</sub>), 3.89-3.96 (1H, m, 5-H<sub>B</sub>), 3.80 (3H, s, OMe), 2.21-2.28 (1H, m, 6-H), 2.13-2.20 (1H, m, 3-H), 2.05-2.13 (1H, m, 4-H<sub>A</sub>), 1.92-1.99 (2H, m, CH<sub>2</sub> cyclohexenyl), 1.83-1.90 (1H, m, 4-H<sub>B</sub>), 1.61-1.70 (2H, m, 2 x CH cyclohexenyl), 1.40-1.54 (1H, m, CH cyclohexenyl), 1.13-1.27 (1H, m, CH cyclohexenyl). <sup>13</sup>C NMR (100 MHz, CDCl<sub>3</sub>)  $\delta$  159.10 (C Ar), 135.2 (C Ar), 129.3 (C-8), 128.7 (C-7), 128.06 (2 x CH Ar), 113.86 (2 x CH Ar), 83.9 (C-2), 68.1 (C-5), 55.4 (OMe), 52.2 (C-3), 36.8 (C-6), 29.8 (C-4), 29.1 (CH<sub>2</sub> cyclohexenyl), 25.44 (CH<sub>2</sub> cyclohexenyl), 21.96 (CH<sub>2</sub> cyclohexenyl). HRMS (CI): calculated for C<sub>17</sub>H<sub>23</sub>O<sub>2</sub> [M+H]<sup>+</sup> requires  $m/z$  259.16926, found  $m/z$  259.16922. IR (film)  $\nu_{\text{max}}$ : 3657, 2980, 2888, 1512, 1382, 1244 cm<sup>-1</sup>.

Partial data for **minor diastereomer B of 3j (from the mixture)**: <sup>1</sup>H NMR (400 MHz, CDCl<sub>3</sub>)  $\delta$  7.27 (2H, d,  $J = 8.5$  Hz, Ar), 6.87 (2H, d,  $J = 8.8$  Hz, Ar), 5.62-5.65 (1H, m, 8-H), 5.41-5.47 (1H, m, 7-H), 4.60 (1H, d,  $J = 7.3$  Hz, 2-H), 3.99-4.10 (1H, m, 5-H<sub>A</sub>), 3.89-3.96 (1H, m, 5-H<sub>B</sub>), 3.80 (3H, s, OMe), 2.21-2.28 (1H, m, 6-H), 2.05-2.13 (2H, m, 3-H and 4-H<sub>A</sub>), 1.92-1.99 (2H, m, CH<sub>2</sub> cyclohexenyl), 1.77-1.91 (2H, m, 4-H<sub>B</sub> and CH cyclohexenyl), 1.72-1.76 (1H, m, CH cyclohexenyl), 1.40-1.54 (1H, m, CH cyclohexenyl), 1.28-1.35 (1H, m, CH cyclohexenyl). <sup>13</sup>C NMR (100 MHz, CDCl<sub>3</sub>)  $\delta$  159.13 (C Ar), 135.0 (C Ar), 130.4 (C-7), 128.1 (C-8), 128.05 (2 x CH Ar), 113.90 (2 x CH Ar), 83.7 (C-2), 67.9 (C-5), 55.4 (OMe), 52.0 (C-3), 37.2 (C-6), 30.2 (C-4), 26.8 (CH<sub>2</sub> cyclohexenyl), 25.35 (CH<sub>2</sub> cyclohexenyl), 22.01 (CH<sub>2</sub> cyclohexenyl).

**8.12. (±)-(2*S*,3*R*)-3-[(1'*R*)-Cyclopent-2-en-1-yl]-2-(4-methoxyphenyl)tetrahydrofuran and (±)-(2*S*,3*R*)-3-[(1'*S*)-cyclopent-2-en-1-yl]-2-(4-methoxyphenyl)tetrahydrofuran (**3k**)**

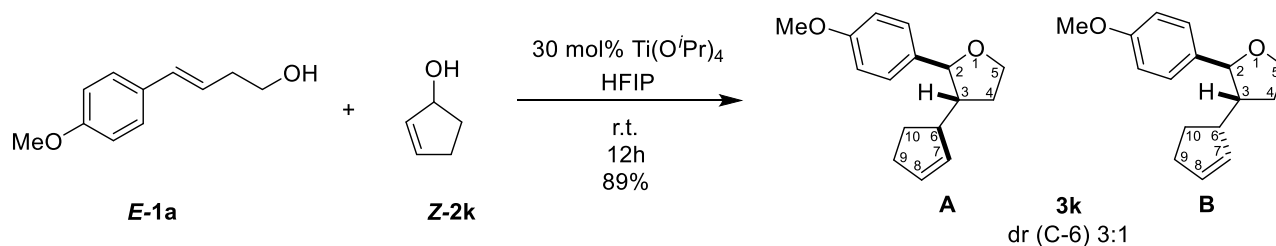

Alcohol **E-1a** (53.0 mg, 0.298 mmol) and **Z-2k** (50.0 mg, 0.596 mmol) and  $\text{Ti(O}^i\text{Pr)}_4$  (25.4 mg, 0.0894 mmol) were subjected to the general procedure except using 2 eq. of the **Z-2k** and conducting the reaction at r.t. (FCC: 6%  $\text{Et}_2\text{O}$  - pentane) to yield an inseparable 3:1 mixture of diastereomer (3.5:1 dr shown in crude NMR) **3k** as a colorless oil (64.7 mg, 89%).

Data for **major diastereomer A of 3k (from the mixture)**:  $R_f$  0.50 (30%  $\text{Et}_2\text{O}$  - pentane).  $^1\text{H NMR}$  (400 MHz,  $\text{CDCl}_3$ )  $\delta$  7.26 (2H, d,  $J = 8.5$  Hz, Ar), 6.87 (2H, d,  $J = 8.7$  Hz, Ar), 5.79-5.83 (1H, m, 7-H), 5.69-5.74 (1H, m, 8-H), 4.48 (1H, d,  $J = 6.3$  Hz, 2-H), 4.06 (1H, q,  $J = 7.2$  Hz, 5- $\text{H}_A$ ), 3.95 (1H, td,  $J = 8.4, 4.7$  Hz, 5- $\text{H}_B$ ), 3.80 (3H, s, OMe), 2.74-2.83 (1H, m, 6-H), 2.20-2.28 (2H, m, 9- $\text{H}_2$ ), 2.06-2.17 (2H, m, 3-H and 4- $\text{H}_A$ ), 1.87-1.97 (1H, m, 10- $\text{H}_A$ ), 1.75-1.86 (1H, m, 4- $\text{H}_B$ ), 1.25-1.36 (1H, m, 10- $\text{H}_B$ ).  $^{13}\text{C NMR}$  (100 MHz,  $\text{CDCl}_3$ )  $\delta$  159.2 (C Ar), 134.9 (C Ar), 132.5 (C-7), 132.4 (C-8), 128.1 (2 x CH Ar), 113.8 (2 x CH Ar), 85.2 (C-2), 68.0 (C-5), 55.4 (OMe), 52.6 (C-3), 47.3 (C-6), 32.3 (C-9), 30.4 (C-4), 29.0 (C-10). **HRMS** (ED): calculated for  $\text{C}_{16}\text{H}_{20}\text{O}_2$   $[\text{M}]^+$  requires  $m/z$  244.1458, found  $m/z$  244.1466. **IR** (film)  $\nu_{\text{max}}$ : 3677, 2988, 2898, 1510, 1342, 1244  $\text{cm}^{-1}$ .

Partial data for **minor diastereomer B of 3k (from the mixture)**:  $^1\text{H NMR}$  (400 MHz,  $\text{CDCl}_3$ )  $\delta$  7.26 (2H, d,  $J = 8.5$  Hz, Ar), 6.87 (2H, d,  $J = 8.7$  Hz, Ar), 5.67-5.69 (1H, m, 7-H), 5.45-5.50 (1H, m, 8-H), 4.50 (1H, d,  $J = 7.5$  Hz, 2-H), 4.07 (1H, q,  $J = 7.1$  Hz, 5- $\text{H}_A$ ), 3.95 (1H, td,  $J = 8.4, 4.7$  Hz, 5- $\text{H}_B$ ), 3.80 (3H, s, OMe), 2.74-2.83 (1H, m, 6-H), 2.28-2.34 (2H, m, 9- $\text{H}_2$ ), 2.06-2.17 (2H, m, 3-H and 4- $\text{H}_A$ ), 1.99-2.05 (1H, m, 10- $\text{H}_A$ ), 1.75-1.86 (1H, m, 4- $\text{H}_B$ ), 1.50-1.57 (1H, m, 10- $\text{H}_B$ ).  $^{13}\text{C NMR}$  (100 MHz,  $\text{CDCl}_3$ )  $\delta$  159.2 (C Ar), 134.8 (C Ar), 133.5 (C-7), 131.4 (C-8), 128.0 (2 x CH Ar), 113.9 (2 x CH Ar), 84.9 (C-2), 67.9 (C-5), 55.4 (OMe), 52.2 (C-3), 47.3 (C-6), 32.2 (C-9), 30.6 (C-4), 29.0 (C-10).

**8.13. (±)-(2*S*,3*R*)-2-(4-Methoxyphenyl)-3-[(1'*S*)-3-methylcyclopent-2-en-1-yl]tetrahydrofuran and (±)-(2*S*,3*R*)-2-(4-methoxyphenyl)-3-[(1'*R*)-3-methylcyclopent-2-en-1-yl]tetrahydrofuran (**3l**)**

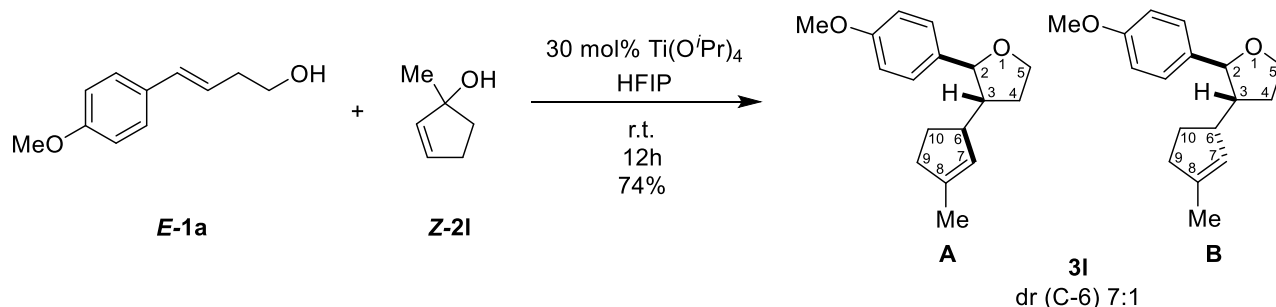

Alcohol **E-1a** (20.7 mg, 0.116 mmol) and **Z-2l** (22.9 mg, 0.232 mmol) and  $\text{Ti(O}^i\text{Pr)}_4$  (9.9 mg, 0.035 mmol) were subjected to the general procedure except using 2.0 eq. of alcohol **Z-2l** and conducting reaction at r.t. (FCC: gradient elution: 6%  $\rightarrow$  12%  $\text{Et}_2\text{O}$  - pentane) to yield 2 clean fractions: first fraction of mixture of 10:1 **diastereomer A** and **B** (10.0 mg, 33%) as a colorless oil, and second fraction of mixture of 5.5:1 **diastereomer A** and **B** as a colorless oil (12.1 mg, 41%).

Data for **major diastereomer A of 3l (from the mixture)**:  $R_f$  0.40 (30%  $\text{Et}_2\text{O}$  - pentane).  $^1\text{H NMR}$  (500 MHz,  $\text{CDCl}_3$ )  $\delta$  7.25 (2H, d,  $J = 8.9$  Hz, Ar), 6.86 (2H, d,  $J = 8.7$  Hz, Ar), 5.28-5.33 (1H, m, 7-H), 4.46 (1H, d,  $J = 7.3$  Hz, 2-H), 4.06 (1H, q,  $J = 8.1$  Hz, 5- $\text{H}_A$ ), 3.94 (1H, td,  $J = 8.3, 4.7$  Hz, 5- $\text{H}_B$ ), 3.80 (3H, s, OMe), 2.72-2.81 (1H, m, 6-H), 2.12-2.20 (2H, m, 9- $\text{H}_2$ ), 2.03-2.11 (2H, m, 3-H and 4- $\text{H}_A$ ), 1.94 (1H, ddt,  $J = 13.2, 8.3, 6.7$  Hz, 10- $\text{H}_A$ ), 1.77-1.86 (1H, m, 4- $\text{H}_B$ ), 1.72 (3H, s, Me), 1.35 (1H, dtd,  $J = 12.8, 8.1, 6.4$  Hz, 10- $\text{H}_B$ ).  $^{13}\text{C NMR}$  (125 MHz,  $\text{CDCl}_3$ )  $\delta$  159.1 (C Ar), 142.3 (C-8), 135.1 (C Ar), 128.03 (2 x C-H Ar), 126.2 (C-7), 113.8 (2 x C-H Ar), 85.2 (C-2), 68.0 (C-5), 55.4 (OMe), 53.0 (C-3), 47.5 (C-6), 36.6 (C-9), 30.4 (C-4), 29.9 (C-10), 16.9 (Me). **NOESY-2D** (500 MHz,  $\text{CDCl}_3$ ): between 2-H and 6-H, between 2-H and 7-H, between 2-H and 10- $\text{H}_B$ . **HRMS** (ESI): calculated for  $\text{C}_{17}\text{H}_{22}\text{O}_2\text{Na}$   $[\text{M}+\text{Na}]^+$  requires  $m/z$  281.15120, found  $m/z$  281.15128. **IR** (film)  $\nu_{\text{max}}$ : 2930, 1611, 1512, 1245, 1031, 828  $\text{cm}^{-1}$ .

Partial data for **minor diastereomer B of 3l (from the mixture)**:  $^1\text{H NMR}$  (500 MHz,  $\text{CDCl}_3$ )  $\delta$  7.25 (2H, d,  $J = 8.9$  Hz, Ar), 6.86 (2H, d,  $J = 8.7$  Hz, Ar), 5.08-5.11 (1H, m, 7-H), 4.49 (1H, d,  $J = 7.4$  Hz, 2-H), 4.06 (1H, q,  $J = 8.1$  Hz, 5- $\text{H}_A$ ), 3.94 (1H, td,  $J = 8.3, 4.7$  Hz, 5- $\text{H}_B$ ), 3.80 (3H, s, OMe), 2.72-2.81 (1H, m, 6-H), 2.12-2.20 (2H, m, 9- $\text{H}_2$ ), 2.03-2.11 (2H, m, 3-H and 4- $\text{H}_A$ ), 1.94 (1H, ddt,  $J = 13.2, 8.3, 6.7$  Hz, 10- $\text{H}_A$ ), 1.77-1.86 (1H, m, 4- $\text{H}_B$ ), 1.72 (3H, s, Me), 1.35 (1H, dtd,  $J = 12.8, 8.1, 6.4$  Hz, 10- $\text{H}_B$ ).  $^{13}\text{C NMR}$  (125 MHz,  $\text{CDCl}_3$ )  $\delta$  159.1 (C Ar), 141.2 (C-8), 135.1 (C Ar), 127.95 (2 x C-H Ar), 127.3 (C-7), 113.9 (2 x C-H Ar), 84.8 (C-2), 67.9 (C-5), 55.4 (OMe), 52.5 (C-3), 47.6 (C-6), 36.5 (C-9), 30.6 (C-4), 28.3 (C-10), 16.8 (Me).

**8.14. (±)-(2*S*,3*R*)-2-(4-Methoxyphenyl)-3-[(1'*S*)-3-phenylcyclopent-2-en-1-yl]tetrahydrofuran (3m)**

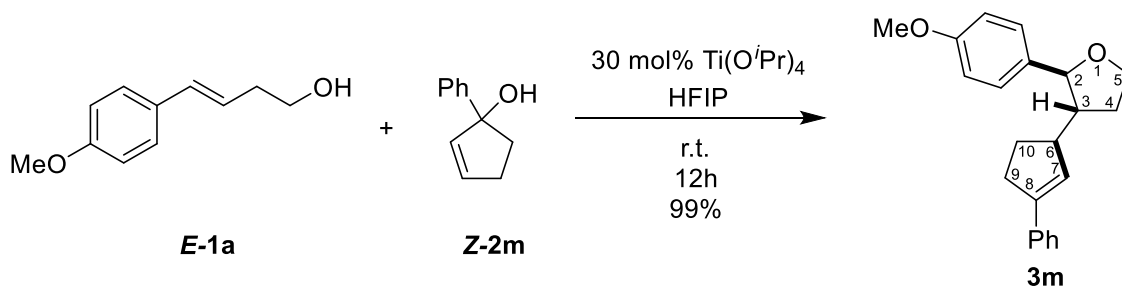

Alcohol **E-1a** (38.0 mg, 0.212 mmol) and **Z-2m** (34.0 mg, 0.212 mmol) and  $\text{Ti(O}^i\text{Pr)}_4$  (18.0 mg, 0.0633 mmol) were subjected to the general procedure except conducting reaction at r.t. (FCC: gradient elution: 7%  $\rightarrow$  15%  $\text{Et}_2\text{O}$  - pentane) to yield **3m** as a yellow oil (67.5 mg, 99%).

Data for **3m**: **R<sub>f</sub>** 0.50 (40%  $\text{Et}_2\text{O}$  - pentane). **<sup>1</sup>H NMR (400 MHz,  $\text{CDCl}_3$ )**  $\delta$  7.43 (2H, d,  $J$  = 8.6 Hz, Ar), 7.21-7.36 (5H, m, Ar), 6.88 (2H, d,  $J$  = 8.7 Hz, Ar), 6.15 (1H, q,  $J$  = 2.0 Hz, 7-H), 4.56 (1H, d,  $J$  = 7.2 Hz, 2-H), 4.13 (1H, q,  $J$  = 7.1 Hz, 5- $\text{H}_\text{A}$ ), 3.98 (1H, td,  $J$  = 8.4, 4.7 Hz, 5- $\text{H}_\text{B}$ ), 3.81 (3H, s, OMe), 2.96-3.04 (1H, m, 6-H), 2.61-2.71 (2H, m, 9- $\text{H}_2$ ), 2.19-2.27 (2H, m, 3-H and 4- $\text{H}_\text{A}$ ), 2.11 (1H, dtd,  $J$  = 13.1, 8.3, 5.0 Hz, 10- $\text{H}_\text{A}$ ), 1.90 (1H, ddd,  $J$  = 8.3, 7.3, 3.8 Hz, 4- $\text{H}_\text{B}$ ), 1.54 (1H, ddt,  $J$  = 12.9, 9.0, 7.1 Hz, 10- $\text{H}_\text{B}$ ). **<sup>13</sup>C NMR (100 MHz,  $\text{CDCl}_3$ )**  $\delta$  159.2 (C Ar), 143.8 (C-8), 136.5 (C Ar), 134.9 (C Ar), 128.4 (2 x C-H Ar), 128.1 (2 x C-H Ar), 127.5 (C-7), 127.4 (C-H Ar), 125.8 (2 x C-H Ar), 113.9 (2 x C-H Ar), 85.1 (C-2), 68.1 (C-5), 55.4 (OMe), 52.7 (C-3), 47.9 (C-6), 32.9 (C-9), 30.6 (C-4), 29.2 (C-10). **NOESY- 2D (400 MHz,  $\text{CDCl}_3$ )**: between 2-H and 6-H, between 2-H and 7-H, between 2-H and 10- $\text{H}_\text{B}$ . **HRMS (ESI)**: calculated for  $\text{C}_{22}\text{H}_{24}\text{O}_2\text{Na}$   $[\text{M}+\text{Na}]^+$  requires  $m/z$  343.16685, found  $m/z$  343.16690. **IR (film)**  $\nu_{\text{max}}$ : 2965, 1712, 1512, 1245, 1030, 827  $\text{cm}^{-1}$ .

**8.15. (±)-(2*S*,3*S*)-2-(2-Bromo-4-methoxyphenyl)-3-cinnamyltetrahydrofuran (3n)**

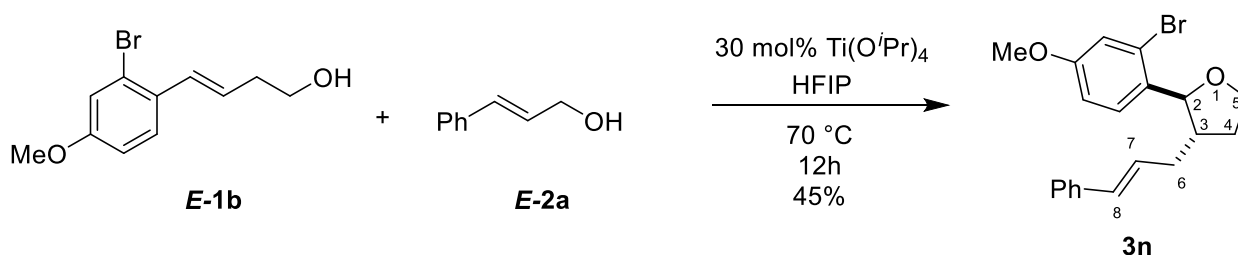

Alcohol **E-1b** (66.8 mg, 0.261 mmol), cinnamyl alcohol **E-2a** (35.0 mg, 0.261 mmol) and  $\text{Ti(O}^i\text{Pr)}_4$  (22.0 mg, 0.0774 mmol) were subjected to the general procedure (FCC: gradient elution: 8%  $\rightarrow$  12%  $\text{Et}_2\text{O}$  - pentane) to yield **3n** as a colorless oil (39.7 mg, 45%).

Data for **3n**: **R<sub>f</sub>** 0.45 (30%  $\text{Et}_2\text{O}$  - pentane). **<sup>1</sup>H NMR (400 MHz,  $\text{CDCl}_3$ )**  $\delta$  7.25-7.36 (5H, m, Ar), 7.17-7.22 (1H, m, Ar), 7.07 (1H, d,  $J$  = 2.6 Hz, Ar), 6.87 (1H, dd,  $J$  = 8.6, 2.6 Hz, Ar), 6.42 (1H, d,  $J$  = 15.8 Hz, 8-H), 6.18 (1H, dt,  $J$  = 15.8, 7.0 Hz, 7-H), 4.93 (1H, d,  $J$  = 5.6 Hz, 2-H), 4.19

(1H, td,  $J = 8.1, 5.6$  Hz, 5-H<sub>A</sub>), 4.01-4.08 (1H, m, 5-H<sub>B</sub>), 3.78 (3H, s, OMe), 2.58 (1H, dddd,  $J = 13.0, 6.4, 4.6, 1.4$  Hz, 6-H<sub>A</sub>), 2.30-2.38 (1H, m, 6-H<sub>B</sub>), 2.20-2.30 (1H, m, 3-H), 2.13 (1H, dq,  $J = 14.3, 7.3$  Hz, 4-H<sub>A</sub>), 1.77-1.88 (1H, m, 4-H<sub>B</sub>). **<sup>13</sup>C NMR (125 MHz, CDCl<sub>3</sub>)**  $\delta$  159.3 (C Ar), 137.6 (C Ar), 134.0 (C Ar), 131.5 (C-8), 128.6 (3 x CH Ar), 128.5 (C-7), 127.2 (CH Ar), 126.1 (2 x CH Ar), 122.7 (C Ar), 117.7 (CH Ar), 114.0 (CH Ar), 84.4 (C-2), 68.2 (C-5), 55.7 (OMe), 47.8 (C-3), 35.9 (C-6), 31.0 (C-4). **HRMS** (CI): calculated for C<sub>20</sub>H<sub>22</sub>BrO<sub>2</sub> [M+H]<sup>+</sup> requires  $m/z$  373.07977, found  $m/z$  373.07950. **IR** (film)  $\nu_{\max}$  : 3658, 2980, 1602, 1491, 1283, 964 cm<sup>-1</sup>.

#### 8.16. (±)-(2*S*,3*S*)-3-Cinnamyl-2-(3,4-dimethylphenyl)tetrahydrofuran (**3o**)

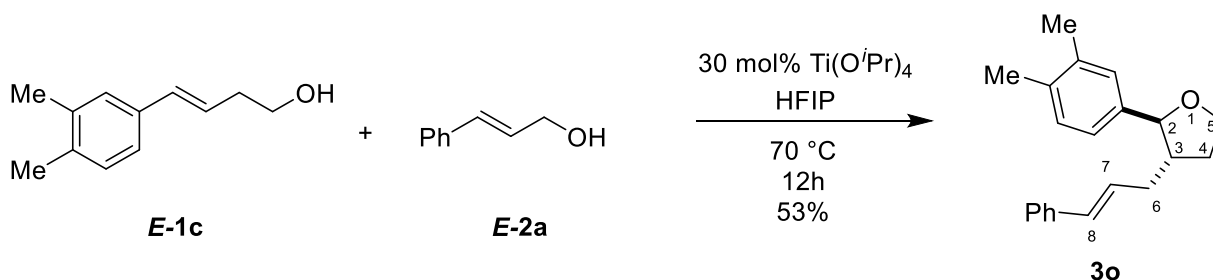

Alcohol **E-1c** (59.3 mg, 0.31 mmol), cinnamyl alcohol **E-2a** (41.6 mg, 0.310 mmol) and Ti(O<sup>*i*</sup>Pr)<sub>4</sub> (26.4mg, 0.0930 mmol) were subjected to the general procedure (FCC: gradient elution: 6% → 20% Et<sub>2</sub>O - pentane) to yield **3o** as a colorless oil (50.2 mg, 53%).

Data for **3o**: **R<sub>f</sub>** 0.50 (25% Et<sub>2</sub>O - pentane). **<sup>1</sup>H NMR (400 MHz, CDCl<sub>3</sub>)**  $\delta$  7.27-7.31 (4H, m, Ar), 7.16-7.23 (1H, m, Ar), 7.05-7.13 (3H, m, Ar), 6.41 (1H, d,  $J = 15.8$  Hz, 8-H), 6.14 (1H, dt,  $J = 15.8, 6.9$  Hz, 7-H), 4.42 (1H, d,  $J = 6.3$  Hz, 2-H), 4.12 (1H, dt,  $J = 8.4, 7.1$  Hz, 5-H<sub>A</sub>), 4.02 (1H, td,  $J = 8.3, 4.7$  Hz, 5-H<sub>B</sub>), 2.40-2.52 (1H, m, 6-H<sub>A</sub>), 2.25 (6H, s, 2 x Me), 2.16-2.24 (3H, m, 3-H, 4-H<sub>A</sub> and 6-H<sub>B</sub>), 1.80 (1H, dddd,  $J = 13.4, 6.1, 3.9, 2.4$  Hz, 4-H<sub>B</sub>). **<sup>13</sup>C NMR (125 MHz, CDCl<sub>3</sub>)**  $\delta$  139.8 (C Ar), 137.6 (C Ar), 136.7 (C Ar), 135.9 (C Ar), 131.4 (C-8), 129.7 (CH Ar), 128.6 (2 x CH Ar and C-7), 127.7 (CH Ar), 127.2 (CH Ar), 126.1 (2 x CH Ar), 123.9 (CH Ar), 86.1 (C-2), 68.0 (C-5), 48.0 (C-3), 35.7 (C-6), 32.5 (C-4), 20.0 (Me), 19.6 (Me). **HRMS** (ESI): calculated for C<sub>21</sub>H<sub>25</sub>O [M+H]<sup>+</sup> requires  $m/z$  293.18999, found  $m/z$  293.18997. **IR** (film)  $\nu_{\max}$  : 2971, 1497, 1449, 964, 743, 692 cm<sup>-1</sup>

#### 8.17. (±)-(2*S*,3*R*)-3-Benzhydryl-2-(2-bromophenyl)tetrahydrofuran (**3p**)

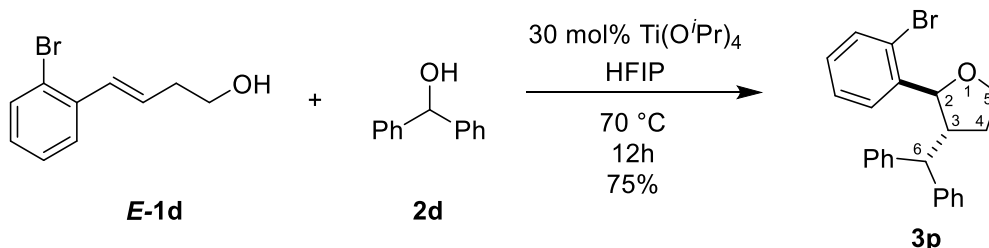

Alcohol **E-1d** (69.6 mg, 0.308 mmol), benzhydryl **2d** (56.7 mg, 0.308 mmol) and  $\text{Ti}(\text{O}^i\text{Pr})_4$  (26.2 mg, 0.0923 mmol) were subjected to the general procedure (FCC: gradient elution: 5%  $\rightarrow$  7%  $\text{Et}_2\text{O}$  - pentane) to yield **3p** as a white foam (90.5 mg, 75%).

Data for **3p**:  $R_f$  0.50 (30%  $\text{Et}_2\text{O}$  - pentane).  $^1\text{H}$  NMR (400 MHz,  $\text{CDCl}_3$ )  $\delta$  7.25-7.39 (4H, m, Ar), 7.17-7.24 (4H, m, Ar), 6.98-7.12 (6H, m, Ar), 5.08 (1H, d,  $J = 5.1$  Hz, 2-H), 4.21 (1H, td,  $J = 8.3, 5.0$  Hz, 5- $\text{H}_\text{A}$ ), 4.02 (1H, q,  $J = 8.0$  Hz, 5- $\text{H}_\text{B}$ ), 4.00 (1H, d,  $J = 10.6$  Hz, 6-H), 3.29 (1H, ddt,  $J = 10.6, 7.4, 5.1$  Hz, 3-H), 2.11-2.23 (1H, m, 4- $\text{H}_\text{A}$ ), 1.79-1.89 (1H, m, 4- $\text{H}_\text{B}$ ).  $^{13}\text{C}$  NMR (100 MHz,  $\text{CDCl}_3$ )  $\delta$  144.0 (C Ar), 142.8 (C Ar), 141.6 (C Ar), 132.9 (CH Ar), 132.8 (CH Ar), 128.72 (3 x CH Ar), 128.69 (3 x CH Ar), 128.2 (3 x CH Ar), 127.2 (CH Ar), 126.5 (CH Ar), 126.4 (CH Ar), 122.8 (C Ar), 84.4 (C-2), 68.0 (C-5), 55.2 (C-6), 50.1 (C-3), 31.3 (C-4). HRMS (ESI): calculated for  $\text{C}_{23}\text{H}_{21}\text{OBrNa}$   $[\text{M}+\text{Na}]^+$  requires  $m/z$  415.06680, found  $m/z$  415.06686. IR (film)  $\nu_{\text{max}}$ : 3649, 2980, 2887, 1450, 1521, 1037  $\text{cm}^{-1}$ .

#### 8.18. ( $\pm$ )-(2S,3S)-3-(4-Methoxybenzyl)-2-phenyltetrahydrofuran (**3q**)

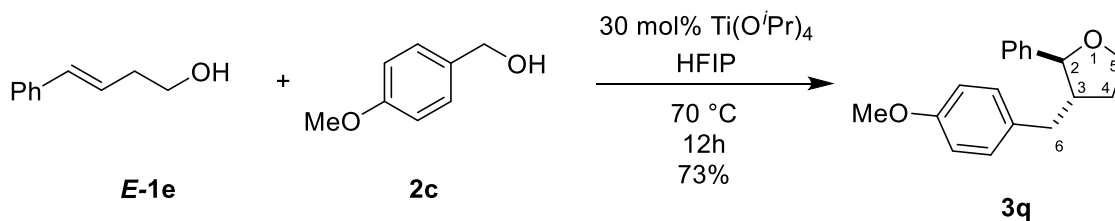

Alcohol **E-1e** (207.4 mg, 1.401 mmol), 4-methoxybenzyl alcohol **2c** (192.4 mg, 1.401 mmol) and  $\text{Ti}(\text{O}^i\text{Pr})_4$  (119.3 mg, 0.4201 mmol) were subjected to the general procedure (FCC: gradient elution: 7%  $\rightarrow$  15%  $\text{Et}_2\text{O}$  - pentane) to yield **3q** as a colorless oil (274.0 mg, 73%).

Data for **3q**:  $R_f$  0.50 (40%  $\text{Et}_2\text{O}$  - pentane).  $^1\text{H}$  NMR (400 MHz,  $\text{CDCl}_3$ )  $\delta$  7.24-7.37 (5H, m, Ar), 7.06 (2H,  $J = 8.6$  Hz, Ar), 6.81 (2H, d,  $J = 8.6$  Hz, Ar), 4.53 (1H, d,  $J = 7.2$  Hz, 2-H), 4.09 (1H, q,  $J = 7.3$  Hz, 5- $\text{H}_\text{A}$ ), 4.04 (1H, td,  $J = 8.2, 5.2$  Hz, 5- $\text{H}_\text{B}$ ), 3.79 (3H, s, OMe), 2.84 (1H, dd,  $J = 13.6, 5.4$  Hz, 6- $\text{H}_\text{A}$ ), 2.55 (1H, dd,  $J = 13.6, 9.5$  Hz, 6- $\text{H}_\text{B}$ ), 2.34 (1H, dqd,  $J = 9.5, 7.5, 5.4$  Hz, 3-H), 2.01-2.11 (1H, m, 4- $\text{H}_\text{A}$ ), 1.78 (1H, dq,  $J = 12.3, 7.8$  Hz, 4- $\text{H}_\text{B}$ ).  $^{13}\text{C}$  NMR (125 MHz,  $\text{CDCl}_3$ )  $\delta$  158.1 (C Ar), 142.6 (C Ar), 132.6 (C Ar), 129.9 (2 x C-H Ar), 128.5 (2 x C-H Ar), 127.5 (C-H Ar), 126.2 (2 x C-H Ar), 113.9 (2 x C-H Ar), 85.6 (C-2), 68.1 (C-5), 55.4 (OMe), 50.2 (C-3), 37.5 (C-6), 32.4 (C-4). HRMS (ESI): calculated for  $\text{C}_{18}\text{H}_{20}\text{O}_2\text{Na}$   $[\text{M}+\text{Na}]^+$  requires  $m/z$  291.13555, found  $m/z$  291.13568. IR (film)  $\nu_{\text{max}}$ : 2980, 1510, 1243, 1177, 1034, 699  $\text{cm}^{-1}$ .



### 8.19. (±)-(2*S*,3*R*)-3-Benzhydryl-2-phenyltetrahydrofuran (**3r**)

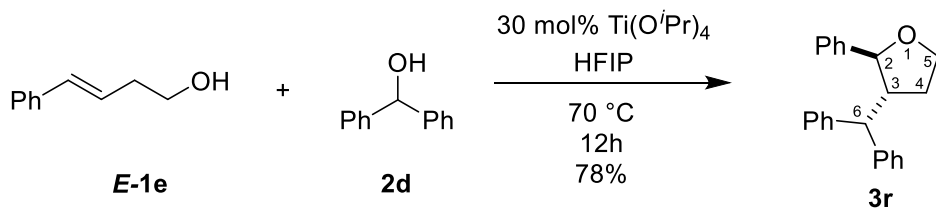

Alcohol **E-1e** (57.3 mg, 0.387 mmol), benzhydryol **2d** (71.2 mg, 0.387 mmol) and  $\text{Ti(O}^i\text{Pr)}_4$  (33.0 mg, 0.116 mmol) were subjected to the general procedure (FCC: gradient elution: 7% → 10%  $\text{Et}_2\text{O}$  - pentane) to yield **3r** as a colorless oil (93.8 mg, 78%).

Data for **3r**:  $R_f$  0.50 (30%  $\text{Et}_2\text{O}$  - pentane).  $^1\text{H NMR}$  (400 MHz,  $\text{CDCl}_3$ )  $\delta$  7.14-7.39 (13H, m, Ar), 7.01 (2H, d,  $J$  = 7.6 Hz, Ar), 4.76 (1H, d,  $J$  = 4.0 Hz, 2-H), 4.21 (1H, dt,  $J$  = 8.3, 4.2 Hz, 5- $\text{H}_\text{A}$ ), 4.07 (1H, q,  $J$  = 8.0 Hz, 5- $\text{H}_\text{B}$ ), 3.99 (1H, d,  $J$  = 11.6 Hz, 6-H), 3.19 (1H, ddt,  $J$  = 11.6, 7.9, 4.0 Hz, 3-H), 2.12-2.23 (1H, m, 4- $\text{H}_\text{A}$ ), 1.72-1.82 (1H, m, 4- $\text{H}_\text{B}$ ).  $^{13}\text{C NMR}$  (100 MHz,  $\text{CDCl}_3$ )  $\delta$  144.0 (C Ar), 143.7 (C Ar), 143.6 (C Ar), 128.7 (2 x C-H Ar), 128.6 (2 x C-H Ar), 128.4 (2 x C-H Ar), 128.09 (2 x C-H Ar), 128.07 (2 x C-H Ar), 126.9 (C-H Ar), 126.5 (C-H Ar), 126.4 (C-H Ar), 125.8 (2 x C-H Ar), 84.8 (C-2), 67.9 (C-5), 55.6 (C-6), 51.7 (C-3), 30.9 (C-4). **HRMS** (ESI): calculated for  $\text{C}_{23}\text{H}_{22}\text{ONa}$   $[\text{M}+\text{Na}]^+$  requires  $m/z$  337.15629, found  $m/z$  337.15631. **IR** (film)  $\nu_{\text{max}}$ : 2980, 2360, 1493, 1451, 1382, 1058  $\text{cm}^{-1}$ .

### 8.20. (±)-(3*R*)-4-Benzhydryl-1-oxaspiro[4.4]nonane (**3s**)

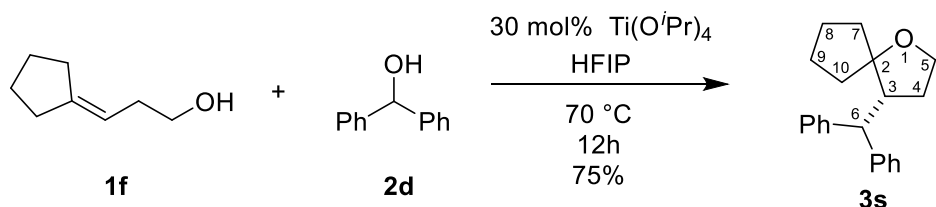

Alcohol **1f** (41.4 mg, 0.329 mmol), benzhydryol **2d** (60.4 mg, 0.329 mmol) and  $\text{Ti(O}^i\text{Pr)}_4$  (28.0 mg, 0.0986 mmol) were subjected to the general procedure (FCC: gradient elution: 5% → 7%  $\text{Et}_2\text{O}$  - pentane) to yield **3s** as a white foam (72.0 mg, 75%).

Data for **3s**:  $R_f$  0.50 (30%  $\text{Et}_2\text{O}$  - pentane).  $^1\text{H NMR}$  (500 MHz,  $\text{CDCl}_3$ )  $\delta$  7.33-7.37 (4H, m, Ar), 7.22-7.28 (4H, m, Ar), 7.11-7.16 (2H, m, Ar), 3.79 (1H, d,  $J$  = 11.7 Hz, 6-H), 3.72 (1H, dt,  $J$  = 8.8, 4.4 Hz, 5- $\text{H}_\text{A}$ ), 3.69 (1H, q,  $J$  = 8.3 Hz, 5- $\text{H}_\text{B}$ ), 3.10 (1H, ddd,  $J$  = 11.7, 10.0, 7.6 Hz, 3-H), 1.93 (1H, dtd,  $J$  = 12.7, 7.5, 4.0 Hz, 4- $\text{H}_\text{A}$ ), 1.46-1.64 (6H, m, 4- $\text{H}_\text{B}$ , 7- $\text{H}_\text{A}$ , 8- $\text{H}_\text{A}$ , 9- $\text{H}_\text{A}$  and 10- $\text{H}_2$ ), 1.37-1.45 (1H, m, 9- $\text{H}_\text{B}$ ), 1.05-1.16 (2H, m, 7- $\text{H}_\text{B}$  and 8- $\text{H}_\text{B}$ ).  $^{13}\text{C NMR}$  (125 MHz,  $\text{CDCl}_3$ )  $\delta$  145.3 (C Ar), 143.8 (C Ar), 128.73 (2 x C-H Ar), 128.65 (2 x C-H Ar), 128.2 (2 x C-H Ar), 127.8 (2 x C-H Ar), 126.5 (C-H Ar), 126.3 (C-H Ar), 93.2 (C-2), 63.6 (C-5), 54.8 (C-6), 47.6 (C-3), 37.8 (C-7),

33.6 (C-4), 31.6 (C-10), 23.7 (C-9), 23.1 (C-8). **HRMS** (EI): calculated for C<sub>21</sub>H<sub>24</sub>O [M]<sup>+</sup> requires *m/z* 292.1822, found *m/z* 292.1818. **IR** (film)  $\nu_{\text{max}}$ : 2980, 2888, 1493, 1451, 1153, 947 cm<sup>-1</sup>.

#### 8.21. (±)-(3*R*)-4-Benzhydryl-1,8-dioxaspiro[4.5]decane (**3t**)

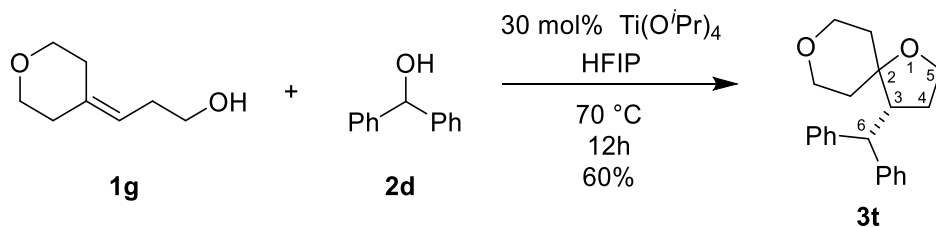

Alcohol **1g** (13.6 mg, 0.096 mmol), benzhydrol **2d** (17.7 mg, 0.096 mmol) and Ti(O<sup>*i*</sup>Pr)<sub>4</sub> (8.2 mg, 0.029 mmol) were subjected to the general procedure (FCC: gradient elution: 12% → 16% Et<sub>2</sub>O - pentane) to yield **3t** as a yellow foam (17.7 mg, 60%).

Data for **3t**: *R<sub>f</sub>* 0.40 (60% Et<sub>2</sub>O - pentane). **<sup>1</sup>H NMR** (400 MHz, CDCl<sub>3</sub>)  $\delta$  7.31-7.39 (4H m, Ar), 7.22-7.32 (4H, m, Ar), 7.11-7.19 (2H, m, Ar), 3.61-3.82 (6H, m, 6-H, 5-H<sub>2</sub>, CH<sub>2</sub> tetrahydropyranyl and CH tetrahydropyranyl), 3.55 (1H, ddd, *J* = 11.1, 4.6, 2.4 Hz, CH tetrahydropyranyl), 2.84 (1H, td, *J* = 11.4, 7.5 Hz, 3-H), 1.89 (1H, dtd, *J* = 12.8, 7.5, 3.2 Hz, 4-H<sub>A</sub>), 1.59-1.75 (2H, m, 4-H<sub>B</sub> and CH tetrahydropyranyl), 1.53 (1H, dd, *J* = 13.1, 2.2 Hz, CH tetrahydropyranyl), 1.14-1.23 (2H, m, CH<sub>2</sub> tetrahydropyranyl). **<sup>13</sup>C NMR** (100 MHz, CDCl<sub>3</sub>)  $\delta$  145.1 (C Ar), 143.2 (C Ar), 128.9 (2 x C-H Ar), 128.8 (2 x C-H Ar), 128.1 (2 x C-H Ar), 127.7 (2 x C-H Ar), 126.4 (C-H Ar), 125.7 (C-H Ar), 80.2 (C-2), 65.0 (C-5), 64.0 (CH<sub>2</sub> tetrahydropyranyl), 63.9 (CH<sub>2</sub> tetrahydropyranyl), 53.5 (C-6), 51.8 (C-3), 37.8 (CH<sub>2</sub> tetrahydropyranyl), 32.7 (C-4), 31.2 (CH<sub>2</sub> tetrahydropyranyl). **HRMS** (ESI): calculated for C<sub>21</sub>H<sub>24</sub>O<sub>2</sub>Na [M+Na]<sup>+</sup> requires *m/z* 331.16685, found *m/z* 331.16690. **IR** (film)  $\nu_{\text{max}}$ : 3657, 2980, 2888, 1382, 1251, 1151 cm<sup>-1</sup>.

#### 8.22. (±)-(2*S*,3*R*)-2-(4-Methoxyphenyl)-3-[(1'*S*)-3-phenylcyclopent-2-en-1-yl]-1-oxaspiro[4.5]decane (**3u**)

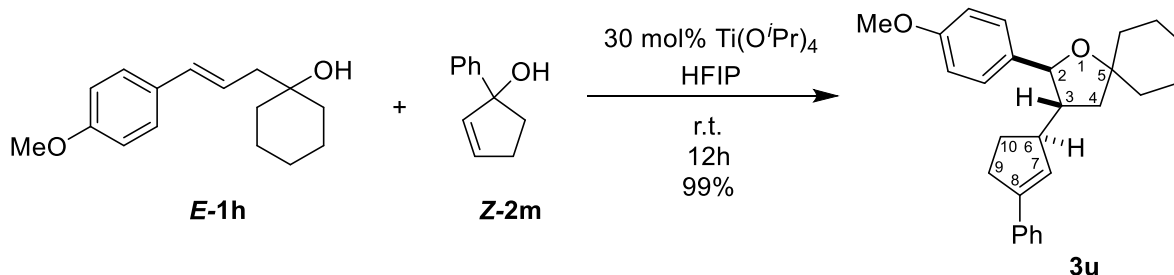

Alcohols **E-1h** (50.0 mg, 0.203 mmol) and **Z-2m** (32.5 mg, 0.203 mmol) and Ti(O<sup>*i*</sup>Pr)<sub>4</sub> (17.3 mg, 0.0609 mmol) were subjected to the general procedure except conducting the reaction at r.t. (FCC: gradient elution: 5% → 20% Et<sub>2</sub>O - pentane) to yield **3u** as a yellow foam (78.3 mg, 99%).

Data for **3u**: **R<sub>f</sub>** 0.40 (20% Et<sub>2</sub>O - pentane). **<sup>1</sup>H NMR (400 MHz, CDCl<sub>3</sub>)**  $\delta$  7.40-7.46 (2H, m, Ar), 7.29-7.36 (4H, m, Ar), 7.21-7.28 (1H, m, Ar), 6.88 (2H, d,  $J$  = 8.7 Hz, Ar), 6.13 (1H, q,  $J$  = 2.0 Hz, 7-H), 4.60 (1H, d,  $J$  = 9.6 Hz, 2-H), 3.81 (3H, s, OMe), 2.83-2.94 (1H, m, 6-H), 2.53-2.66 (2H, m, 9-H<sub>2</sub>), 2.18-2.27 (1H, m, 3-H), 2.14 (1H, dd,  $J$  = 11.9, 7.5 Hz, 4-H<sub>A</sub>), 1.96 (1H, dtd,  $J$  = 13.2, 8.3, 4.9 Hz, 10-H<sub>A</sub>), 1.59-1.82 (7H, m, 4-H<sub>B</sub> and 3 x CH<sub>2</sub> cyclohexyl), 1.31-1.50 (5H, m, 10-H<sub>B</sub> and 2 x CH<sub>2</sub> cyclohexyl). **<sup>13</sup>C NMR (100 MHz, CDCl<sub>3</sub>)**  $\delta$  159.3 (C Ar), 143.6 (C-8), 136.5 (C Ar), 134.4 (C Ar), 128.6 (2 x C-H Ar), 128.4 (2 x C-H Ar), 127.5 (C-7), 127.3 (C-H Ar), 125.7 (2 x C-H Ar), 113.8 (2 x C-H Ar), 84.4 (C-2), 81.8 (C-5), 55.4 (OMe), 52.9 (C-3), 47.1 (C-6), 41.3 (C-4), 39.2 (CH<sub>2</sub> cyclohexyl), 38.9 (CH<sub>2</sub> cyclohexyl), 32.9 (C-9), 29.4 (C-10), 25.8 (CH<sub>2</sub> cyclohexyl), 24.2 (CH<sub>2</sub> cyclohexyl), 23.8 (CH<sub>2</sub> cyclohexyl). **HRMS (ESI)**: calculated for C<sub>27</sub>H<sub>33</sub>O<sub>2</sub> [M+H]<sup>+</sup> requires  $m/z$  389.24751, found  $m/z$  389.24783. **IR (film)**  $\nu_{\text{max}}$ : 3656, 2980, 2929, 1512, 1244, 1072 cm<sup>-1</sup>.

**8.23. (±)-(2*S*,3*R*)-2-(4-Methoxyphenyl)-3-[(1'*S*)-3-phenylcyclopent-2-en-1-yl]-1,8-dioxaspiro[4.5]decane (**3v**)**

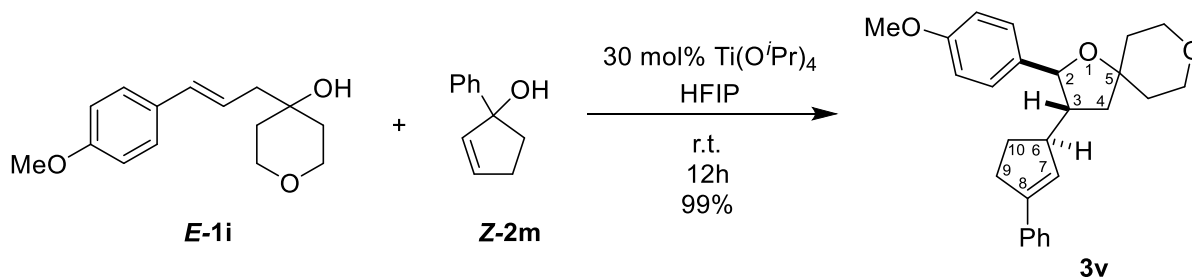

Alcohols **E-1i** (60.0 mg, 0.242 mmol) and **Z-2m** (38.7 mg, 0.242 mmol) and Ti(O<sup>*i*</sup>Pr)<sub>4</sub> (20.6 mg, 0.0725 mmol) were subjected to the general procedure except conducting the reaction at r.t. (FCC: gradient elution: 20% → 35% Et<sub>2</sub>O - pentane) to yield **3v** as a yellow solid (94.0 mg, 99%).

Data for **3v**: **R<sub>f</sub>** 0.30 (60% Et<sub>2</sub>O - pentane). **M.p.**: 89 °C (10% EtOAc - pentane). **<sup>1</sup>H NMR (500 MHz, CDCl<sub>3</sub>)**  $\delta$  7.43 (2H, d,  $J$  = 7.9 Hz, Ar), 7.23-7.36 (5H, m, Ar), 6.90 (2H, d,  $J$  = 7.9 Hz, Ar), 6.12 (1H, q,  $J$  = 2.0 Hz, 7-H), 4.62 (1H, d,  $J$  = 9.6 Hz, 2-H), 3.85-3.97 (2H, m, CH<sub>2</sub> tetrahydropyranyl), 3.68-3.75 (1H, m, CH tetrahydropyranyl), 3.59-3.68 (1H, m, CH tetrahydropyranyl), 2.86-2.95 (1H, m, 6-H), 2.55-2.68 (2H, m, 9-H<sub>2</sub>), 2.22-2.31 (1H, m, 3-H), 2.15-2.21 (1H, m, 4-H<sub>A</sub>), 1.99 (1H, dtd,  $J$  = 13.2, 8.2, 4.5 Hz, 10-H<sub>A</sub>), 1.85-1.93 (1H, m, CH tetrahydropyranyl), 1.76-1.82 (3H, m, CH tetrahydropyranyl and CH<sub>2</sub> tetrahydropyranyl), 1.72 (1H, t,  $J$  = 11.6 Hz, 4-H<sub>B</sub>), 1.38 (1H, dq,  $J$  = 15.2, 7.8 Hz, 10-H<sub>B</sub>). **<sup>13</sup>C NMR (125 MHz, CDCl<sub>3</sub>)**  $\delta$  159.4 (C Ar), 143.9 (C-8), 136.4 (C Ar), 133.8 (C Ar), 128.54 (2 x C-H Ar), 128.45 (2 x C-H Ar), 127.4 (C-H Ar), 127.1 (C-7), 125.8 (2 x C-H Ar), 113.9 (2 x C-H Ar), 84.6 (C-2), 78.5 (C-5), 65.6 (CH<sub>2</sub> tetrahydropyranyl), 65.5 (CH<sub>2</sub> tetrahydropyranyl), 55.4 (OMe), 52.6 (C-3), 46.9 (C-6), 41.9 (C-4), 39.4 (CH<sub>2</sub> tetrahydropyranyl), 39.0 (CH<sub>2</sub> tetrahydropyranyl), 32.9 (C-9), 29.4 (C-10). **HRMS**

(ESI): calculated for  $C_{26}H_{30}O_3Na$   $[M+Na]^+$  requires  $m/z$  413.20872, found  $m/z$  413.21051. **IR** (film)  $\nu_{max}$ : 3657, 2980, 1461, 1248, 1152, 1073  $cm^{-1}$ .

#### 8.24. ( $\pm$ )-(2*S*,3*S*)-3-Cinnamyl-2-(4-methoxyphenyl)-5,5-dimethyltetrahydrofuran (**3w**)

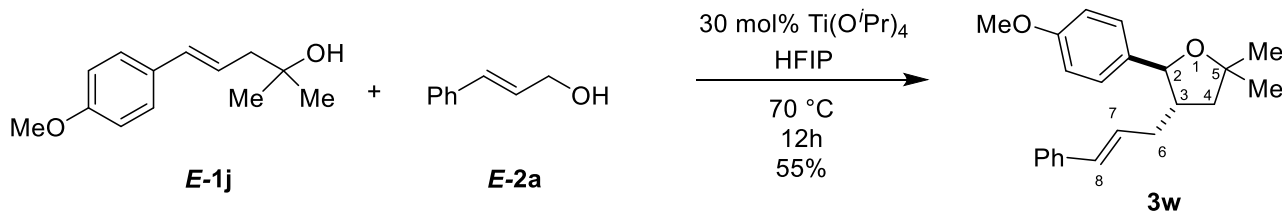

Alcohol **E-1j** (62.2 mg, 0.302 mmol), cinnamyl alcohol **E-2a** (40.5 mg, 0.302 mmol) and  $Ti(O^iPr)_4$  (25.7 mg, 0.0905 mmol) were subjected to the general procedure (FCC: gradient elution: 20%  $\rightarrow$  35%  $Et_2O$  - pentane) to yield **3w** as a colorless oil (51.8 mg, 55%).

Data for **3w**:  $R_f$  0.50 (35%  $Et_2O$  - pentane).  **$^1H$  NMR (400 MHz,  $CDCl_3$ )**  $\delta$  7.23-7.33 (6H, m, Ar), 7.15-7.22 (1H, m, Ar), 6.88 (2H, d,  $J$  = 8.7 Hz, Ar), 6.34 (1H, d,  $J$  = 15.8 Hz, 8-H), 6.05 (1H, dt,  $J$  = 15.8, 6.7 Hz, 7-H), 4.46 (1H, d,  $J$  = 9.4 Hz, 2-H), 3.79 (3H, s, OMe), 2.35 (1H, dddd,  $J$  = 13.5, 6.6, 4.2, 1.5 Hz, 6- $H_A$ ), 2.25 (1H, dddd,  $J$  = 9.2, 7.9, 3.9, 2.2 Hz, 3-H), 2.09-2.18 (2H, m, 4- $H_A$  and 6- $H_B$ ), 1.61-1.71 (1H, m, 4- $H_B$ ), 1.39 (3H, s, Me), 1.38 (3H, s, Me).  **$^{13}C$  NMR (100 MHz,  $CDCl_3$ )**  $\delta$  159.3 (C Ar), 137.6 (C Ar), 133.6 (C Ar), 131.1 (C-8), 128.6 (C-7), 128.6 (2 x CH Ar), 128.2 (CH Ar), 127.1 (2 x CH Ar), 126.1 (2 x CH Ar), 113.9 (2 x CH Ar), 85.8 (C-2), 80.0 (C-5), 55.4 (OMe), 48.7 (C-3), 46.1 (C-4), 34.8 (C-6), 29.9 (Me), 29.6 (Me). **HRMS** (ESI): calculated for  $C_{22}H_{27}O_2$   $[M+H]^+$  requires  $m/z$  323.20056, found  $m/z$  323.20053. **IR** (film)  $\nu_{max}$ : 2980, 2889, 1512, 1461, 1245, 1153  $cm^{-1}$ .

#### 8.25. ( $\pm$ )-(2*S*,3*S*)-3-Cinnamyl-2-(4-methoxyphenyl)-2,3-dihydrobenzofuran (**3x**)

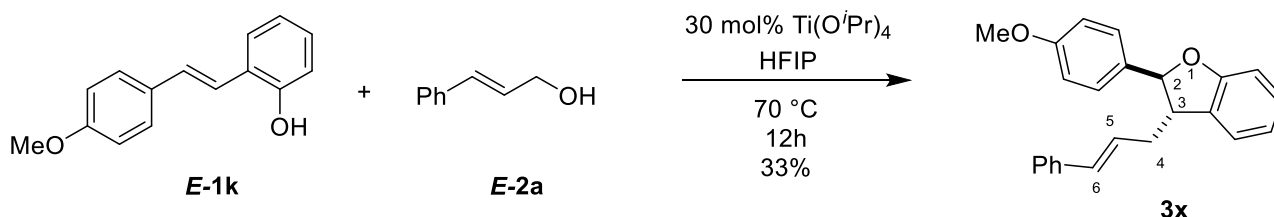

Alcohol **E-1k** (69.2 mg, 0.306 mmol), cinnamyl alcohol **E-2a** (41.0 mg, 0.306 mmol) and  $Ti(O^iPr)_4$  (26.0 mg, 0.0915 mmol) were subjected to the general procedure (FCC: 3%  $Et_2O$  - pentane) to yield **3x** as a colorless oil (30.8 mg, 33%).

Data for **3x**:  $R_f$  0.30 (10%  $Et_2O$  - pentane).  **$^1H$  NMR (500 MHz,  $CDCl_3$ )**  $\delta$  7.25-7.34 (6H, m, Ar), 7.16-7.24 (3H, m, Ar), 6.84-6.94 (4H, m, Ar), 6.50 (1H, d,  $J$  = 16.0 Hz, 6-H), 6.17 (1H, dt,  $J$  = 14.4, 7.2 Hz, 5-H), 5.35 (1H, d,  $J$  = 7.1 Hz, 2-H), 3.79 (3H, s, OMe), 3.58 (1H, q,  $J$  = 7.2 Hz, 3-H), 2.61-2.81 (2H, m, 4- $H_2$ ).  **$^{13}C$  NMR (125 MHz,  $CDCl_3$ )**  $\delta$  159.62 (C Ar), 159.59 (C Ar), 137.3

(C Ar), 133.6 (C Ar), 132.7 (C-6), 127.0 (C Ar), 128.7 (3 x CH Ar), 127.7 (2 x CH Ar), 127.4 (CH Ar), 127.2 (C-5), 126.3 (2 x CH Ar), 124.5 (CH Ar), 120.8 (CH Ar), 114.1 (2 x CH Ar), 109.7 (CH Ar), 89.4 (C-2), 55.4 (OMe), 50.5 (C-3), 38.1 (C-4). **NOESY- 2D (500 MHz, CDCl<sub>3</sub>)**: between 2-H and 4-H<sub>2</sub>, between 2-H and 5-H, between 2-H and 6-H. **HRMS (ESI)**: calculated for C<sub>24</sub>H<sub>23</sub>O<sub>2</sub> [M+H]<sup>+</sup> requires *m/z* 343.16926, found *m/z* 343.16937. **IR** (film)  $\nu_{\max}$ : 3658, 2980, 1513, 1247, 956, 826 cm<sup>-1</sup>.

#### 8.26. (±)-(2*S*,3*S*)-3-Benzhydryl-2-(4-methoxyphenyl)-2,3-dihydrobenzofuran (**3y**)

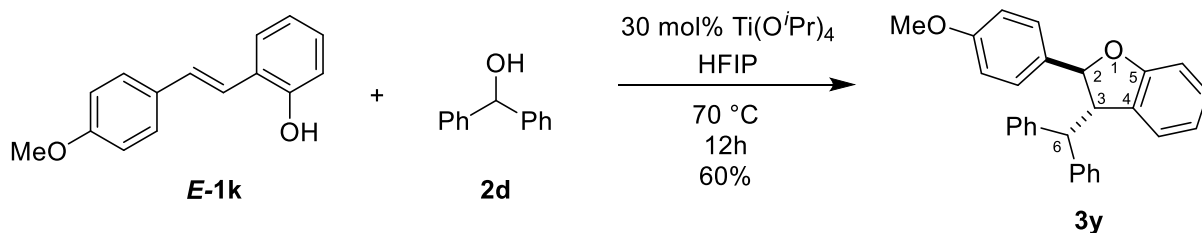

Alcohol **E-1k** (20.2 mg, 0.0891 mmol), benzhydryl **2d** (16.4 mg, 0.0891 mmol) and Ti(O<sup>*i*</sup>Pr)<sub>4</sub> (7.6 mg, 0.027 mmol) were subjected to the general procedure (FCC: gradient elution: 4% → 10% Et<sub>2</sub>O - pentane) to yield **3y** as a white foam (20.7 mg, 60%).

Data for **3y**: **R<sub>f</sub>** 0.40 (15% Et<sub>2</sub>O - pentane). **<sup>1</sup>H NMR (400 MHz, CDCl<sub>3</sub>)**  $\delta$  7.19 -7.32 (10H, m, Ar), 7.13 (1H, t, *J* = 7.7 Hz, Ar), 6.83-6.89 (3H, m, Ar), 6.75 (2H, d, *J* = 8.7 Hz, Ar), 6.59 (1H, t, *J* = 7.6 Hz, Ar), 6.14 (1H, d, *J* = 7.6 Hz, Ar), 5.30 (1H, d, *J* = 4.1 Hz, 2-H), 4.26 (1H, dd, *J* = 11.5, 4.1 Hz, 3-H), 4.09 (1H, d, *J* = 11.5 Hz, 6-H), 3.77 (3H, s, OMe). **<sup>13</sup>C NMR (100 MHz, CDCl<sub>3</sub>)**  $\delta$  160.0 (C-4), 159.4 (C-5), 142.7 (C Ar), 142.6 (C Ar), 134.5 (C Ar), 128.82 (5 x C-H Ar), 128.78 (2 x C-H Ar), 128.7 (C Ar), 128.5 (2 x C-H Ar), 127.2 (2 x C-H Ar), 126.96 (C-H Ar), 126.95 (C-H Ar), 126.3 (C-H Ar), 120.0 (C-H Ar), 113.9 (2 x C-H Ar), 109.4 (C-H Ar), 88.2 (C-2), 58.1 (C-6), 55.4 (OMe), 55.0 (C-3). **HRMS (ESI)**: calculated for C<sub>28</sub>H<sub>24</sub>O<sub>2</sub>Na [M+Na]<sup>+</sup> requires *m/z* 415.16685, found *m/z* 415.16687. **IR** (film)  $\nu_{\max}$ : 2980, 2887, 2360, 1457, 1302, 1022 cm<sup>-1</sup>.

#### 8.27. (±)-(2*S*,3*S*,4*R*,5*R*)-3-Benzhydryl-2-(4-methoxyphenyl)-5-methyl-4-phenyltetrahydrofuran and (±)-(2*S*,3*S*,4*S*,5*S*)-3-benzhydryl-2-(4-methoxyphenyl)-5-methyl-4-phenyltetrahydrofuran (**3z**)

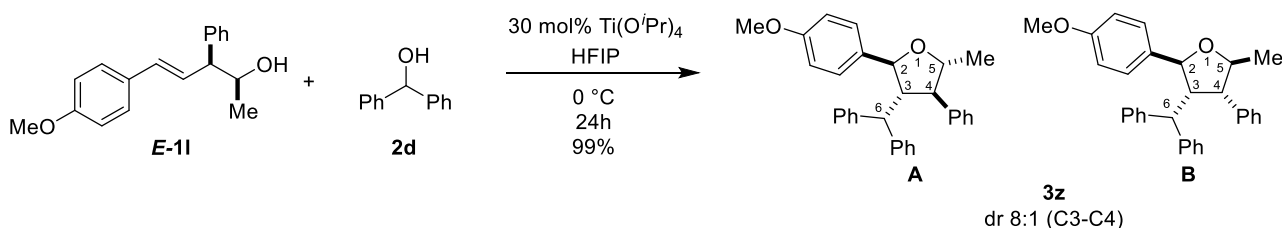

Alcohol **E-1l** (5.0 mg, 0.019 mmol), benzhydryl **2d** (3.5 mg, 0.019 mmol) and Ti(O<sup>*i*</sup>Pr)<sub>4</sub> (1.7 mg, 0.0057 mmol) were subjected to the general procedure except conducting the reaction at

0°C for 24 hours (FCC: gradient elution: 5% → 10% Et<sub>2</sub>O - pentane) to yield inseparable 8:1 mixture of diastereomers **3z** as a colorless oil (8.0 mg, 99%).

Data for **major diastereomer A of 3z (from the mixture)**: R<sub>f</sub> 0.50 (30% Et<sub>2</sub>O - pentane).

**<sup>1</sup>H NMR (500 MHz, CDCl<sub>3</sub>)** δ 7.23 (2H, d, *J* = 8.1 Hz, Ar), 7.15 (2H, t, *J* = 7.5 Hz, Ar), 6.95-7.11 (11H, m, Ar), 6.76 (2H, d, *J* = 8.7 Hz, Ar), 6.65-6.68 (2H, m, Ar), 4.95 (1H, d, *J* = 4.6 Hz, 2-H), 4.26 (1H, dq, *J* = 8.7, 5.9 Hz, 5-H), 4.06 (1H, d, *J* = 11.1 Hz, 6-H), 3.79 (3H, s, OMe), 3.47 (1H, ddd, *J* = 11.4, 7.1, 4.7 Hz, 3-H), 2.64 (1H, dd, *J* = 8.8, 7.1 Hz, 4-H), 1.24 (3H, d, *J* = 6.0 Hz, Me). **<sup>13</sup>C NMR (125 MHz, CDCl<sub>3</sub>)** δ 158.6 (C Ar), 143.6 (C Ar), 142.5 (C Ar), 142.1 (C Ar), 135.7 (C Ar), 128.7 (2 x C-H Ar), 128.63 (2 x C-H Ar), 128.46 (2 x C-H Ar), 128.3 (2 x C-H Ar), 128.13 (2 x C-H Ar), 128.10 (2 x C-H Ar), 127.4 (2 x C-H Ar), 126.6 (C-H Ar), 126.3 (C-H Ar), 126.04 (C-H Ar), 113.8 (2 x C-H Ar), 84.6 (C-2), 83.4 (C-5), 61.3 (C-4), 60.9 (C-3), 59.5 (C-6), 55.4 (OMe), 19.5 (Me). **NOESY- 2D (500 MHz, CDCl<sub>3</sub>)**: between 2-H and Me, between 2-H and 6-H, between 2-H and 4-H, between 3-H and 5-H. **HRMS (ESI)**: calculated for C<sub>31</sub>H<sub>30</sub>O<sub>2</sub>Na [M+ Na]<sup>+</sup> requires *m/z* 457.21380, found *m/z* 457.21353. **IR (film)** ν<sub>max</sub>: 2980, 2888, 1382, 1248, 1152, 954 cm<sup>-1</sup>.

Partial data for **minor diastereomer B of 3z (from the mixture)**: **<sup>1</sup>H NMR (500 MHz, CDCl<sub>3</sub>)** δ 7.23 (2H, d, *J* = 8.1 Hz, Ar), 6.95-7.17 (13H, m, Ar), 6.80 (2H, d, *J* = 8.4 Hz, Ar), 6.53 (2H, d, *J* = 8.7 Hz, Ar), 4.77 (1H, d, *J* = 9.3 Hz, 2-H), 4.39-4.44 (1H, m, 5-H), 3.72 (3H, s, OMe), 3.62-3.68 (1H, m, 3-H), 3.49 (1H, d, *J* = 12.4 Hz, 6-H), 3.26 (1H, dd, *J* = 8.3, 4.1 Hz, 4-H), 1.49 (3H, d, *J* = 6.2 Hz, Me). **<sup>13</sup>C NMR (125 MHz, CDCl<sub>3</sub>)** δ 158.6 (C Ar), 143.7 (C Ar), 142.1 (C Ar), 140.6 (C Ar), 129.1 (C Ar), 128.57 (2 x C-H Ar), 128.53 (2 x C-H Ar), 128.4 (2 x C-H Ar), 128.0 (2 x C-H Ar), 127.9 (2 x C-H Ar), 127.8 (2 x C-H Ar), 127.4 (2 x C-H Ar), 126.5 (C-H Ar), 126.1 (C-H Ar), 125.95 (C-H Ar), 113.4 (2 x C-H Ar), 85.9 (C-2), 81.3 (C-5), 56.2 (C-4), 55.4 (OMe), 53.3 (C-3), 52.3 (C-6), 22.7 (Me). **NOESY- 2D (500 MHz, CDCl<sub>3</sub>)**: between 2-H and 5-H, between 2-H and 6-H.

**8.28. (±)-(2*S*,3*S*,4*R*,5*S*)-3-Benzhydryl-2-(4-methoxyphenyl)-5-methyl-4-phenyltetrahydrofuran and (±)-(2*S*,3*S*,4*S*,5*R*)-3-benzhydryl-2-(4-methoxyphenyl)-5-methyl-4-phenyltetrahydrofuran (**3aa**)**

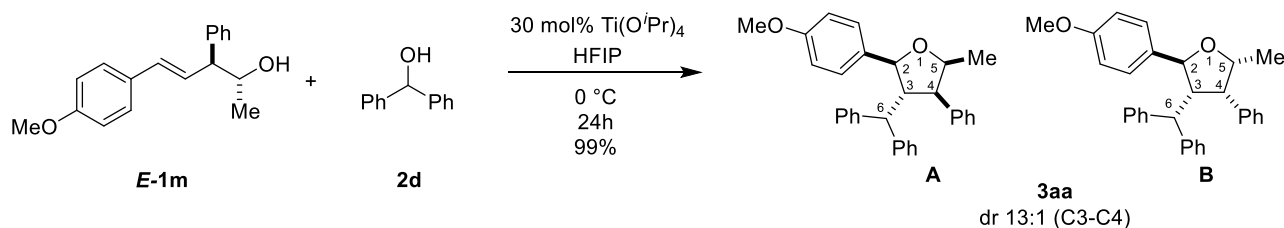

Alcohol **E-1m** (23.9 mg, 0.0864 mmol), benzhydryl **2d** (15.9 mg, 0.0864 mmol) and Ti(O<sup>*i*</sup>Pr)<sub>4</sub> (7.3 mg, 0.026 mmol) were subjected to the general procedure except conducting the

reaction at 0°C for 24 hours (FCC: gradient elution: 5% → 6% Et<sub>2</sub>O - pentane) to yield inseparable 13:1 mixture of diastereomers **3aa** as a colorless oil (37.7 mg, 99%).

Data for **major diastereomer A of 3aa (from the mixture)**: R<sub>f</sub> 0.50 (30% Et<sub>2</sub>O - pentane). <sup>1</sup>H NMR (500 MHz, CDCl<sub>3</sub>) δ 7.17-7.27 (3H, m, Ar), 7.07-7.15 (5H, m, Ar), 6.96-7.06 (7H, m, Ar), 6.86 (2H, d, *J* = 8.7 Hz, Ar), 6.64 (2H, d, *J* = 8.8 Hz, Ar), 4.58 (1H, d, *J* = 7.5 Hz, 2-H), 4.32 (1H, quint, *J* = 6.3 Hz, 5-H), 4.09 (1H, d, *J* = 11.4 Hz, 6-H), 3.75 (3H, s, OMe), 3.35 (1H, ddd, *J* = 11.2, 7.5, 3.5 Hz, 3-H), 3.01 (1H, dd, *J* = 6.4, 3.4 Hz, 4-H), 0.98 (3H, d, *J* = 6.3 Hz, Me). <sup>13</sup>C NMR (125 MHz, CDCl<sub>3</sub>) δ 158.8 (C Ar), 143.6 (C Ar), 143.3 (C Ar), 142.7 (C Ar), 133.1 (C Ar), 129.2 (2 x C-H Ar), 128.59 (2 x C-H Ar), 128.57 (2 x C-H Ar), 128.51 (2 x C-H Ar), 128.41 (2 x C-H Ar), 128.37 (2 x C-H Ar), 128.07 (2 x C-H Ar), 126.5 (C-H Ar), 126.4 (C-H Ar), 126.1 (C-H Ar), 113.46 (2 x C-H Ar), 86.6 (C-2), 77.8 (C-5), 60.9 (C-3), 58.3 (C-6), 56.5 (C-4), 55.38 (OMe), 16.7 (Me). NOESY- 2D (500 MHz, CDCl<sub>3</sub>): between 2-H and 4-H, between 2-H and 5-H, between 2-H and 6-H, between 4-H and 6-H. HRMS (ESI): calculated for C<sub>31</sub>H<sub>30</sub>O<sub>2</sub>Na [M+Na]<sup>+</sup> requires *m/z* 457.21380, found *m/z* 457.21353. IR (film) ν<sub>max</sub>: 2980, 2888, 1382, 1248, 1152, 954 cm<sup>-1</sup>.

Partial data for **minor diastereomer B of 3aa (from the mixture)**: <sup>1</sup>H NMR (500 MHz, CDCl<sub>3</sub>) δ 7.31-7.42 (3H, m, Ar), 7.07-7.15 (5H, m, Ar), 6.96-7.06 (7H, m, Ar), 6.77 (2H, d, *J* = 8.6 Hz, Ar), 6.56 (2H, d, *J* = 8.6 Hz, Ar), 4.85-4.89 (1H, m, 5-H), 4.84 (1H, d, *J* = 7.5 Hz, 2-H), 3.80-3.87 (1H, m, 3-H), 3.73 (3H, s, OMe), 3.52 (1H, d, *J* = 11.9 Hz, 6-H), 3.31-3.34 (1H, m, 4-H), 1.02 (3H, d, *J* = 6.3 Hz, Me). <sup>13</sup>C NMR (125 MHz, CDCl<sub>3</sub>) δ 158.4 (C Ar), 143.5 (C Ar), 137.2 (C Ar), 136.6 (C Ar), 128.63 (C Ar), 128.59 (2 x C-H Ar), 128.46 (2 x C-H Ar), 128.23 (2 x C-H Ar), 128.22 (2 x C-H Ar), 128.12 (2 x C-H Ar), 127.92 (2 x C-H Ar), 127.85 (2 x C-H Ar), 126.7 (C-H Ar), 126.6 (C-H Ar), 126.3 (C-H Ar), 113.48 (2 x C-H Ar), 84.8 (C-2), 78.9 (C-5), 57.3 (C-3), 55.41 (OMe), 54.8 (C-4), 53.1 (C-6), 16.9 (Me). NOESY- 2D (500 MHz, CDCl<sub>3</sub>): between 2-H and 6-H, between 3-H and 5-H.

## 8.29. (±)-(2*S*,3*R*)-3-Cinnamyl-2-(4-methoxyphenyl)tetrahydro-2H-pyran (**3ab**)

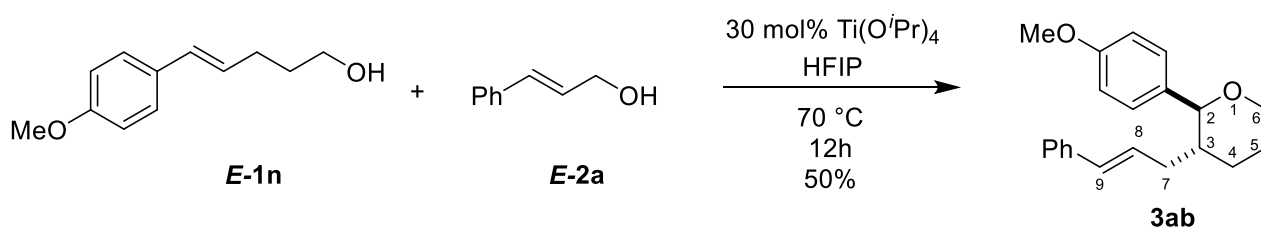

Alcohol **E-1n** (50.5 mg, 0.263 mmol), cinnamyl alcohol **E-2a** (35.2 mg, 0.263 mmol) and Ti(O<sup>*i*</sup>Pr)<sub>4</sub> (22.4 mg, 0.0789 mmol) were subjected to the general procedure (FCC: gradient elution: 7% → 12% Et<sub>2</sub>O - pentane) to yield **3ab** as a colorless oil (40.0 mg, 50%).

Data for **3ab**:  $R_f$  0.50 (30% Et<sub>2</sub>O - pentane). **<sup>1</sup>H NMR (400 MHz, CDCl<sub>3</sub>)**  $\delta$  7.24-7.33 (6H, m, Ar), 7.15-7.23 (1H, m, Ar), 6.90 (2H, d,  $J$  = 8.7 Hz, Ar), 6.22 (1H, d,  $J$  = 15.7 Hz, 9-H), 6.00 (1H, dt,  $J$  = 14.9, 7.2 Hz, 8-H), 4.09 (1H, dt,  $J$  = 11.6, 4.1 Hz, 6-H<sub>A</sub>), 3.94 (1H, d,  $J$  = 9.1 Hz, 2-H), 3.81 (3H, s, OMe), 3.54 (1H, td,  $J$  = 11.5, 2.6 Hz, 6-H<sub>B</sub>), 2.04-2.12 (1H, m, 4-H<sub>A</sub>), 1.96-2.04 (1H, m, 7-H<sub>A</sub>), 1.72-1.87 (3H, m, 3-H, 5-H<sub>A</sub> and 7-H<sub>B</sub>), 1.62-1.70 (1H, m, 5-H<sub>B</sub>), 1.34 (1H, qd,  $J$  = 13.0, 4.1 Hz, 4-H<sub>B</sub>). **<sup>13</sup>C NMR (100 MHz, CDCl<sub>3</sub>)**  $\delta$  159.4 (C Ar), 137.7 (C Ar), 133.6 (C Ar), 131.5 (C-9), 128.8 (2 x C-H Ar), 128.6 (2 x C-H Ar), 128.2 (C-8), 127.0 (C-H Ar), 126.0 (2 x C-H Ar), 113.9 (2 x C-H Ar), 85.6 (C-2), 69.0 (C-6), 55.4 (OMe), 42.2 (C-3), 36.0 (C-7), 30.0 (C-4), 26.7 (C-5). **HRMS (ESI)**: calculated for C<sub>21</sub>H<sub>25</sub>O<sub>2</sub> [M+H]<sup>+</sup> requires  $m/z$  309.18491, found  $m/z$  309.18488. **IR** (film)  $\nu_{max}$ : 3658, 2980, 2933, 1512, 1241, 1075 cm<sup>-1</sup>.

### 8.30. (±)-(4*S*,5*S*)-4-Cinnamyl-5-(4-methoxyphenyl)dihydrofuran-2(3*H*)-one (**3ac**)

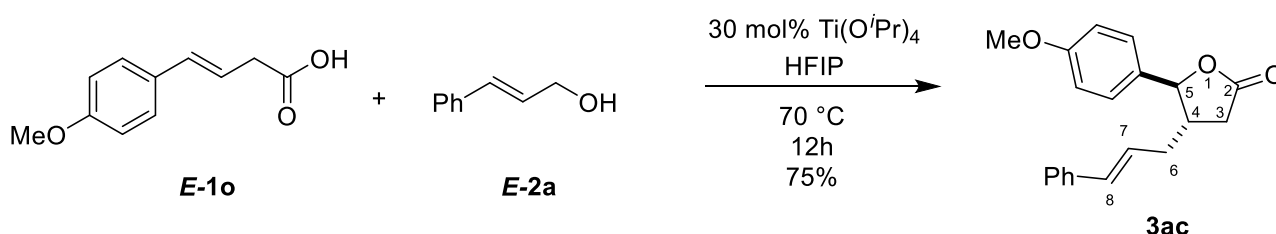

Carboxylic acid **E-1o** (45.6 mg, 0.238 mmol), cinnamyl alcohol **E-2a** (31.8 mg, 0.238 mmol) and Ti(O<sup>*i*</sup>Pr)<sub>4</sub> (20.0 mg, 0.0704 mmol) were subjected to the general procedure (FCC: gradient elution: 15% → 45% Et<sub>2</sub>O - pentane) to yield **3ac** as a colorless oil (55.0 mg, 75%).

Data for **3ac**:  $R_f$  0.50 (40% Et<sub>2</sub>O - pentane). **<sup>1</sup>H NMR (400 MHz, CDCl<sub>3</sub>)**  $\delta$  7.19-7.34 (7H, m, Ar), 6.92 (2H, d,  $J$  = 8.7 Hz, Ar), 6.45 (1H, d,  $J$  = 15.9 Hz, 8-H), 6.04 (1H, dt,  $J$  = 15.8, 7.1 Hz, 7-H), 5.08 (1H, d,  $J$  = 7.6 Hz, 5-H), 3.82 (3H, s, OMe), 2.81 (1H, dd,  $J$  = 17.2, 7.9 Hz, 3-H<sub>A</sub>), 2.54-2.68 (1H, m, 4-H), 2.46-2.54 (1H, m, 6-H<sub>A</sub>), 2.42 (1H, dd,  $J$  = 17.2, 7.9 Hz, 3-H<sub>B</sub>), 2.31-2.39 (1H, m, 6-H<sub>B</sub>). **<sup>13</sup>C NMR (100 MHz, CDCl<sub>3</sub>)**  $\delta$  176.0 (C=O), 160.0 (C Ar), 136.9 (C Ar), 133.0 (C-8), 130.1 (C Ar), 128.7 (2 x C-H Ar), 127.7 (2 x C-H Ar), 127.6 (C-H Ar), 126.2 (2 x C-H Ar), 125.9 (C-7), 114.2 (2 x C-H Ar), 86.1 (C-5), 55.4 (OMe), 44.5 (C-4), 35.4 (C-6), 35.0 (C-3). **HRMS (CI)**: calculated for C<sub>20</sub>H<sub>21</sub>O<sub>3</sub> [M+H]<sup>+</sup> requires  $m/z$  309.14852, found  $m/z$  309.14856. **IR** (film)  $\nu_{max}$  : 2980, 1774, 1514, 1248, 1144, 1029 cm<sup>-1</sup>.



**8.31. (±)-(4*R*,5*S*)-4-[(1'*R*,2'*E*)-1,3-diphenylallyl]-5-(4-methoxyphenyl)dihydrofuran-2(3*H*)-one and (±)-(4*R*,5*S*)-4-[(1'*S*,2'*E*)-1,3-diphenylallyl]-5-(4-methoxyphenyl)dihydrofuran-2(3*H*)-one (3ad)**

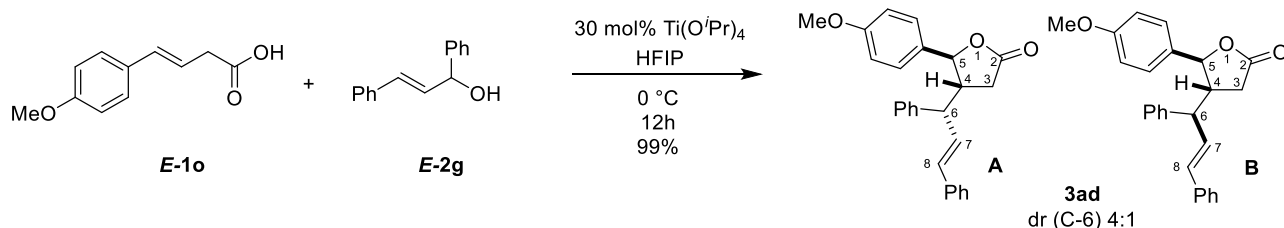

Carboxylic acid **E-1o** (200.0 mg, 1.031 mmol), *trans*-1,3-diphenyl-2-propen-1-ol **E-2g** (219.0 mg, 1.031 mmol) and Ti(O<sup>*i*</sup>Pr)<sub>4</sub> (88.6 mg, 0.312 mmol) were subjected to the general procedure except conducting the reaction at at 0°C (FCC: gradient elution: 15% → 30% Et<sub>2</sub>O - pentane) to yield separable 4:1 mixture of diastereomers **3ad** as a colorless oil (399.0 mg, 99%).

Data for **major diastereomer A of 3ad**: **R<sub>f</sub>** 0.40 (70% Et<sub>2</sub>O - pentane). **<sup>1</sup>H NMR (500 MHz, CDCl<sub>3</sub>)** δ 7.32-7.37 (2H, m, Ar), 7.17-7.30 (10H, m, Ar), 6.86 (2H, d, *J* = 8.7 Hz, Ar), 6.51 (1H, d, *J* = 15.7 Hz, 8-H), 6.10 (1H, dd, *J* = 15.7, 9.2 Hz, 7-H), 5.37 (1H, d, *J* = 5.7 Hz, 5-H), 3.79 (3H, s, OMe), 3.54 (1H, t, *J* = 9.5 Hz, 6-H), 2.96-3.06 (1H, m, 4-H), 2.64 (1H, dd, *J* = 18.0, 8.7 Hz, 3-H<sub>A</sub>), 2.35 (1H, dd, *J* = 18.0, 7.1 Hz, 3-H<sub>B</sub>). **<sup>13</sup>C NMR (125 MHz, CDCl<sub>3</sub>)** δ 176.0 (C=O), 159.8 (C Ar), 141.3 (C Ar), 136.6 (C Ar), 132.0 (C-8), 131.1 (C Ar), 130.6 (C-7), 129.2 (2 x C-H Ar), 128.6 (2 x C-H Ar), 128.0 (2 x C-H Ar), 127.79 (2 x C-H Ar), 127.75 (C-H Ar), 127.3 (C-H Ar), 126.4 (2 x C-H Ar), 114.3 (2 x C-H Ar), 84.9 (C-5), 55.4 (OMe), 52.6 (C-6), 48.6 (C-4), 33.6 (C-3). **HRMS (ESI)**: calculated for C<sub>26</sub>H<sub>24</sub>O<sub>3</sub>Na [M+ Na]<sup>+</sup> requires *m/z* 407.16177, found *m/z* 407.16190. **IR (film)** ν<sub>max</sub>: 2982, 1764, 1524, 1278, 1124, 1019 cm<sup>-1</sup>.

Data for **minor diastereomer B of 3ad**: **R<sub>f</sub>** 0.50 (70% Et<sub>2</sub>O - pentane). **<sup>1</sup>H NMR (500 MHz, CDCl<sub>3</sub>)** δ 7.28-7.35 (6H, m, Ar), 7.17-7.26 (4H, m, Ar), 6.91 (2H, d, *J* = 8.7 Hz, Ar), 6.79 (2H, d, *J* = 8.8 Hz, Ar), 6.50 (1H, d, *J* = 15.7 Hz, 8-H), 6.27 (1H, dd, *J* = 15.7, 9.0 Hz, 7-H), 5.17 (1H, d, *J* = 4.8 Hz, 5-H), 3.78 (3H, s, OMe), 3.49 (1H, t, *J* = 9.2 Hz, 6-H), 2.90-2.97 (1H, m, 4-H), 2.81 (1H, dd, *J* = 17.9, 8.6 Hz, 3-H<sub>A</sub>), 2.66 (1H, dd, *J* = 17.9, 5.9 Hz, 3-H<sub>B</sub>). **<sup>13</sup>C NMR (125 MHz, CDCl<sub>3</sub>)** δ 176.4 (C=O), 159.6 (C Ar), 141.3 (C Ar), 136.6 (C Ar), 132.7 (C-8), 131.2 (C Ar), 129.5 (C-7), 129.2 (2 x C-H Ar), 128.8 (2 x C-H Ar), 128.1 (2 x C-H Ar), 128.0 (C-H Ar), 127.4 (C-H Ar), 126.9 (2 x C-H Ar), 126.5 (2 x C-H Ar), 114.2 (2 x C-H Ar), 84.2 (C-5), 55.5 (OMe), 52.6 (C-6), 48.6 (C-4), 32.7 (C-3).

### 8.32. (±)-(5*R*,6*S*)-5-Cinnamyl-6-(4-methoxyphenyl)tetrahydro-2*H*-pyran-2-one (**3ae**)

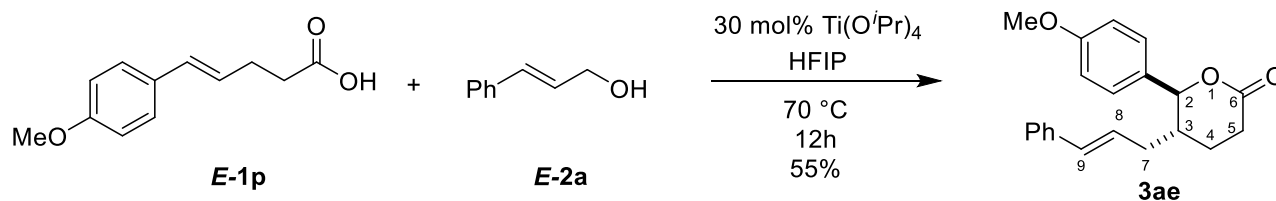

Carboxylic acid **E-1p** (45.9 mg, 0.224 mmol), cinnamyl alcohol **E-2a** (30.0 mg, 0.224 mmol) and  $\text{Ti}(\text{O}^i\text{Pr})_4$  (19.0 mg, 0.0669 mmol) were subjected to the general procedure (FCC: gradient elution: 18%  $\rightarrow$  25%  $\text{Et}_2\text{O}$  - pentane) to yield **3ae** as a colorless oil (38.9 mg, 55%).

Data for **3ae**:  $R_f$  0.50 (50%  $\text{Et}_2\text{O}$  - pentane).  $^1\text{H}$  NMR (400 MHz,  $\text{CDCl}_3$ )  $\delta$  7.24-7.31 (6H, m, Ar), 7.17-7.26 (1H, m, Ar), 6.92 (2H, d,  $J$  = 8.7 Hz, Ar), 6.32 (1H, d,  $J$  = 15.8 Hz, 9-H), 6.00 (1H, ddd,  $J$  = 15.6, 8.2, 6.3 Hz, 8-H), 4.97 (1H, d,  $J$  = 9.4 Hz, 2-H), 3.81 (3H, s, OMe), 2.75 (1H, ddd,  $J$  = 17.9, 7.1, 4.6 Hz, 5- $\text{H}_A$ ), 2.61 (1H, ddd,  $J$  = 17.8, 9.5, 6.8 Hz, 5- $\text{H}_B$ ), 2.15-2.23 (1H, m, 7- $\text{H}_A$ ), 2.04-2.14 (2H, m, 3-H and 4- $\text{H}_A$ ), 1.91-2.04 (1H, m, 7- $\text{H}_B$ ), 1.74 (1H, dddd,  $J$  = 15.0, 11.3, 6.8, 4.7 Hz, 4- $\text{H}_B$ ).  $^{13}\text{C}$  NMR (100 MHz,  $\text{CDCl}_3$ )  $\delta$  171.1 (C-6), 159.7 (C Ar), 136.8 (C Ar), 132.6 (C-9), 130.1 (C Ar), 128.4 (2 x C-H Ar), 128.3 (2 x C-H Ar), 127.2 (C-H Ar), 125.9 (C-8), 125.8 (2 x C-H Ar), 113.8 (2 x C-H Ar), 86.1 (C-2), 55.1 (OMe), 39.4 (C-3), 34.7 (C-7), 29.3 (C-5), 24.3 (C-4). HRMS (CI): calculated for  $\text{C}_{21}\text{H}_{22}\text{O}_3$   $[\text{M}+\text{H}]^+$  requires  $m/z$  323.16417, found  $m/z$  323.16418. IR (film)  $\nu_{\text{max}}$  : 2980, 1727, 1514, 1246, 1072, 966  $\text{cm}^{-1}$ .

### 8.33. (+)-(2*R*,3*R*,4*S*)-3-(4-Methoxybenzyl)-2-(4-methoxyphenyl)-4-phenyltetrahydrofuran and (+)-(2*S*,3*S*,4*S*)-3-(4-methoxybenzyl)-2-(4-methoxyphenyl)-4-phenyltetrahydrofuran [(+)-**3af**]

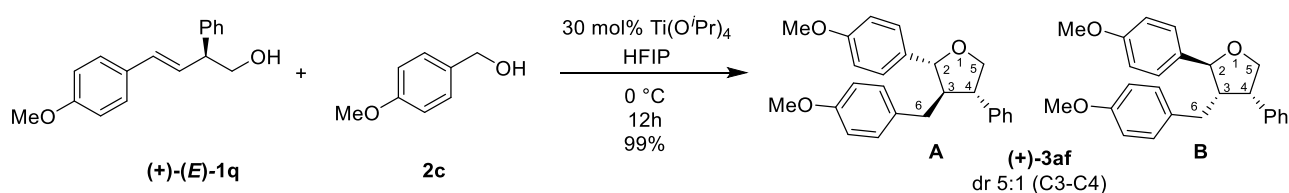

Alcohol (+)-(E)-**1q** (30.0 mg, 0.118 mmol), 4-methoxybenzyl alcohol **2c** (15.7 mg, 0.118 mmol) and  $\text{Ti}(\text{O}^i\text{Pr})_4$  (9.7 mg, 0.034 mmol) were subjected to the general procedure except conducting the reaction at at  $0^\circ\text{C}$  (FCC: gradient elution: 10%  $\rightarrow$  15%  $\text{Et}_2\text{O}$  - pentane) to yield inseparable 5:1 mixture of diastereomers (+)-**3af** as a colorless oil (43.8 mg, 99%, 99% ee).

Data for major diastereomer A of (+)-**3af** (from the mixture):  $R_f$  0.50 (50%  $\text{Et}_2\text{O}$  - pentane).  $[\alpha]_D^{25} = +39.6$  ( $c$  = 6.75,  $\text{CHCl}_3$ ).  $^1\text{H}$  (500 MHz,  $\text{CDCl}_3$ )  $\delta$  7.23-7.31 (4H, m, Ar), 7.14-7.22 (4H, m, Ar), 6.82-6.90 (3H, m, Ar), 6.68 (2H, d,  $J$  = 8.7 Hz, Ar), 4.61 (1H, d,  $J$  = 8.8 Hz, 2-H), 4.24 (1H, t,  $J$  = 8.4 Hz, 5- $\text{H}_A$ ), 4.06 (1H, t,  $J$  = 8.1 Hz, 5- $\text{H}_B$ ), 3.81 (3H, s, OMe), 3.75 (3H, s, OMe), 3.24 (1H, q,  $J$  = 8.2 Hz, 4-H), 2.66-2.79 (2H, m, 6- $\text{H}_2$ ), 2.59 (1H, m, 3-H).  $^{13}\text{C}$  NMR (125 MHz,

**CDCl<sub>3</sub>**)  $\delta$  159.3 (C Ar), 158.0 (C Ar), 142.1 (C Ar), 133.6 (C Ar), 130.9 (C Ar), 130.5 (2 x C-H Ar), 128.7 (2 x C-H Ar), 128.1 (2 x C-H Ar), 127.7 (2 x C-H Ar), 126.5 (C-H Ar), 113.93 (2 x C-H Ar), 113.6 (2 x C-H Ar), 86.2 (C-2), 75.3 (C-5), 57.0 (C-3), 55.40 (OMe), 55.38 (OMe), 51.3 (C-4), 35.7 (C-6). **HRMS** (ESI): calculated for C<sub>25</sub>H<sub>26</sub>O<sub>3</sub>Na [M+Na]<sup>+</sup> requires  $m/z$  397.17742, found  $m/z$  397.17747. **IR** (film)  $\nu_{\max}$ : 2980, 2889, 1510, 1381, 1243, 1031 cm<sup>-1</sup>.

Partial data for **minor diastereomer B** of (+)-**3af** (from the mixture): **<sup>1</sup>H NMR (500 MHz, CDCl<sub>3</sub>)**  $\delta$  7.32-7.37 (2H, m, Ar), 7.14-7.22 (4H, m, Ar), 6.82-6.90 (5H, m, Ar), 6.76 (2H, d,  $J$  = 8.7 Hz, Ar), 4.77 (1H, d,  $J$  = 7.7 Hz, 2-H), 5.50-5.56 (1H, m, 5-H<sub>A</sub>), 4.30 (1H, dd,  $J$  = 8.6, 4.3 Hz, 5-H<sub>B</sub>), 3.81 (3H, s, OMe), 3.78 (3H, s, OMe), 3.56 (1H, q,  $J$  = 6.1 Hz, 4-H), 2.66-2.79 (1H, m, 3-H), 2.43 (1H, dd,  $J$  = 14.6, 6.4 Hz, 6-H<sub>A</sub>), 2.19 (1H, dd,  $J$  = 14.4, 8.8 Hz, 6-H<sub>B</sub>). **<sup>13</sup>C NMR (125 MHz, CDCl<sub>3</sub>)**  $\delta$  158.0 (C Ar), 157.9 (C Ar), 140.3 (C Ar), 134.8 (C Ar), 132.1 (C Ar), 129.9 (2 x C-H Ar), 129.0 (2 x C-H Ar), 128.4 (2 x C-H Ar), 127.5 (2 x C-H Ar), 126.6 (C-H Ar), 113.87 (2 x C-H Ar), 113.7 (2 x C-H Ar), 84.4 (C-2), 74.0 (C-5), 55.38 (OMe), 55.34 (OMe), 54.2 (C-3), 47.7 (C-4), 32.4 (C-6).

Racemic ( $\pm$ )-**3af** (99%, 5:1 dr) was made with the same procedure with racemic alcohol ( $\pm$ )-**(E)-1q**.

#### 8.34. (+)-(2*R*,3*R*,4*S*)-3-Benzhydryl-2-(4-methoxyphenyl)-4-phenyltetrahydrofuran and (+)-(2*S*,3*S*,4*S*)-3-benzhydryl-2-(4-methoxyphenyl)-4-phenyltetrahydrofuran [(+)-**3ag**]

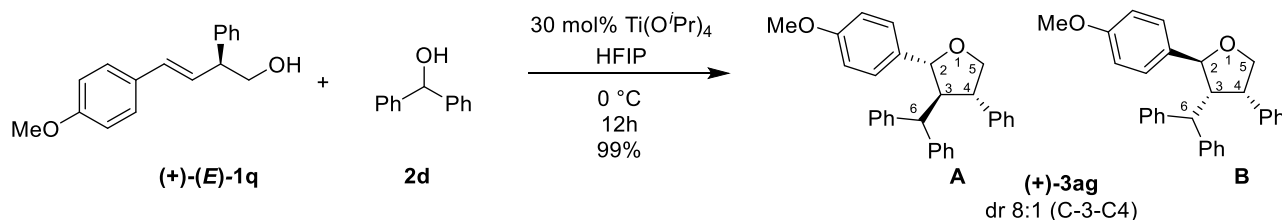

Alcohol (+)-**(E)-1q** (22.7 mg, 0.0894 mmol), benzhydrol **2d** (16.4 mg, 0.0894 mmol) and Ti(O<sup>*i*</sup>Pr)<sub>4</sub> (7.6 mg, 0.027 mmol) were subjected to the general procedure except conducting the reaction at at 0°C (FCC: gradient elution: 10% → 20% Et<sub>2</sub>O - pentane) to yield inseparable 8:1 mixture of diastereomers (+)-**3ag** as a white foam (37.4 mg, 99%, 99% ee).

Data for **major diastereomer A** of (+)-**3ag** (from the mixture): **R<sub>f</sub>** 0.30 (25% Et<sub>2</sub>O - pentane).  $[\alpha]_D^{25} = +2.5$  ( $c$  = 10.0, CHCl<sub>3</sub>). **<sup>1</sup>H NMR (500 MHz, CDCl<sub>3</sub>)**  $\delta$  7.00-7.23 (12H, m, Ar), 6.81-6.88 (5H, m, Ar), 6.67 (2H, d,  $J$  = 7.8 Hz, Ar), 4.64 (1H, d,  $J$  = 6.3 Hz, 2-H), 4.25 (1H, dd,  $J$  = 9.3, 7.3 Hz, 5-H<sub>A</sub>), 4.17 (1H, dd,  $J$  = 9.3, 4.2 Hz, 5-H<sub>B</sub>), 4.03 (1H, d,  $J$  = 11.3 Hz, 6-H), 3.76 (3H, s, OMe), 3.26 (1H, ddd,  $J$  = 11.1, 6.3, 4.5 Hz, 3-H), 3.19 (1H, dt,  $J$  = 7.2, 4.4 Hz, 4-H). **<sup>13</sup>C NMR (125 MHz, CDCl<sub>3</sub>)**  $\delta$  158.8 (C Ar), 145.3 (C Ar), 143.3 (C Ar), 142.8 (C Ar), 134.0 (C Ar), 128.7 (2 x C-H Ar), 128.5 (3 x C-H Ar), 128.44 (2 x C-H Ar), 128.40 (2 x C-H Ar), 128.3 (2 x C-H Ar), 128.1 (C-H Ar), 127.6 (2 x C-H Ar), 126.62 (C-H Ar), 126.56 (C-H Ar), 126.1 (C-H Ar), 113.6 (2 x

C-H Ar), 87.4 (C-2), 75.1 (C-5), 60.8 (C-3), 58.7 (C-6), 55.4 (OMe), 52.1 (C-4). **NOESY- 2D (500 MHz, CDCl<sub>3</sub>)**: between 2-H and 6-H, between 2-H and 4-H, between 4-H and 6-H. **HRMS (ESI)**: calculated for C<sub>30</sub>H<sub>28</sub>O<sub>2</sub>Na [M+Na]<sup>+</sup> requires *m/z* 443.19815, found *m/z* 443.19785. **IR (film)**  $\nu_{\text{max}}$ : 3649, 2980, 1513, 1453, 1302, 1248 cm<sup>-1</sup>.

Partial data for **minor diastereomer B of (+)-3ag (from the mixture)**: **<sup>1</sup>H NMR (500 MHz, CDCl<sub>3</sub>)**  $\delta$  7.00-7.23 (11H, m, Ar), 6.89-6.94 (2H, m, Ar), 6.78-6.81 (2H, m, Ar), 6.74 (2H, d, *J* = 8.7 Hz, Ar), 6.54 (2H, d, *J* = 8.7 Hz, Ar), 4.77 (1H, d, *J* = 9.0 Hz, 2-H), 4.60 (1H, dd, *J* = 8.7, 5.4 Hz, 5-H<sub>A</sub>), 4.19-4.23 (1H, m, 5-H<sub>B</sub>), 3.73 (3H, s, OMe), 3.64-3.71 (1H, m, 3-H), 3.56-3.62 (1H, m, 4-H), 3.39 (1H, d, *J* = 11.8 Hz, 6-H). **<sup>13</sup>C NMR (125 MHz, CDCl<sub>3</sub>)**  $\delta$  158.4 (C Ar), 143.6 (C Ar), 142.7 (C Ar), 141.1 (C Ar), 135.6 (C Ar), 129.1 (C-H Ar), 128.5 (3 x C-H Ar), 128.44 (2 x C-H Ar), 128.40 (2 x C-H Ar), 128.2 (2 x C-H Ar), 128.00 (2 x C-H Ar), 127.98 (2 x C-H Ar), 126.7 (C-H Ar), 126.3 (C-H Ar), 126.2 (C-H Ar), 113.4 (2 x C-H Ar), 84.6 (C-2), 75.2 (C-5), 55.5 (C-3), 55.4 (OMe), 52.8 (C-6), 49.7 (C-4). **NOESY- 2D (500 MHz, CDCl<sub>3</sub>)**: between 2-H and 6-H.

Racemic ( $\pm$ )-**3ag** (99%, 8:1 dr) was made with the same procedure with racemic alcohol ( $\pm$ )-**(E)-1q**.

**8.35. (+)-(2*R*,3*R*,4*S*)-2-(4-Methoxyphenyl)-3-[(2'*E*)-penta-2,4-dien-1-yl]-4-phenyltetrahydrofuran and (+)-(2*S*,3*S*,4*S*)-2-(4-methoxyphenyl)-3-[(2'*E*)-penta-2,4-dien-1-yl]-4-phenyltetrahydrofuran [(+)-3ah]**

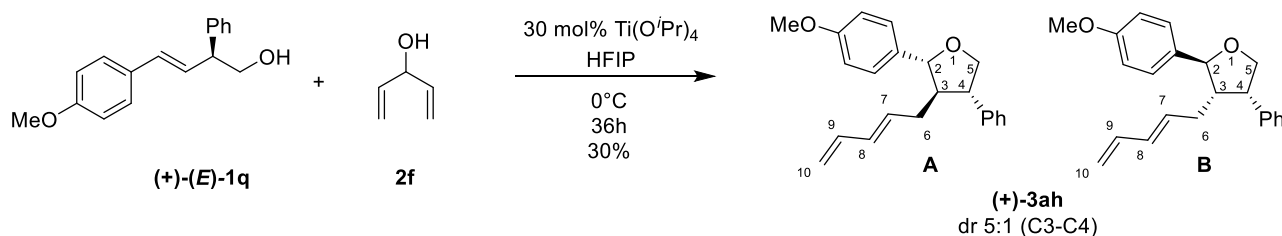

Alcohol (+)-**(E)-1q** (30.0 mg, 0.118 mmol), bis-allyl alcohol **2f** (15.7 mg, 0.118 mmol) and Ti(O<sup>*i*</sup>Pr)<sub>4</sub> (9.7 mg, 0.034 mmol) were subjected to the general procedure except conducting the reaction at at 0°C for 36 hours (FCC: gradient elution: 7% → 9% Et<sub>2</sub>O - pentane) to yield inseparable 5:1 mixture of diastereomers (+)-**3ah** as a colorless oil (11.3 mg, 30%, 99% ee).

Data for **major diastereomer A of (+)-3ah (from the mixture)**: **R<sub>f</sub>** 0.50 (25% Et<sub>2</sub>O - pentane).  $[\alpha]_{\text{D}}^{25} = +20.0$  (*c* = 1.35, CHCl<sub>3</sub>). **<sup>1</sup>H (500 MHz, CDCl<sub>3</sub>)**  $\delta$  7.19-7.37 (7H, m, Ar), 6.90 (2H, d, *J* = 8.7 Hz, Ar), 6.12 (1H, dt, *J* = 16.9, 10.2 Hz, 9-H), 5.97 (1H, dd, *J* = 15.1, 10.4 Hz, 8-H), 5.38-5.48 (1H, m, 7-H), 5.05 (1H, dd, *J* = 16.8, 1.7 Hz, 10-H<sub>A</sub>), 4.94 (1H, dd, *J* = 10.0, 1.8 Hz, 10-H<sub>B</sub>), 4.58 (1H, d, *J* = 8.9 Hz, 2-H), 4.28 (1H, t, *J* = 8.5 Hz, 5-H<sub>A</sub>), 4.09 (1H, dd, *J* = 8.7, 7.8 Hz, 5-H<sub>B</sub>), 3.82 (3H, s, OMe), 3.26 (1H, q, *J* = 8.3 Hz, 4-H), 2.27-2.34 (1H, m, 3-H), 2.20-2.27 (2H, m, 6-H<sub>2</sub>). **<sup>13</sup>C NMR (125 MHz, CDCl<sub>3</sub>)**  $\delta$  159.4 (C Ar), 142.0 (C Ar), 136.9 (C-9), 133.5 (C Ar), 133.3

(C-8), 131.5 (C-7), 128.8 (2 x C-H Ar), 128.1 (2 x C-H Ar), 127.9 (2 x C-H Ar), 126.8 (C-H Ar), 115.6 (C-10), 114.00 (2 x C-H Ar), 86.4 (C-2), 75.3 (C-5), 56.2 (C-3), 55.5 (OMe), 51.6 (C-4), 33.1 (C-6). **HRMS**: stable ion was not found in ESI, EI and CI. **IR** (film)  $\nu_{\text{max}}$ : 2980, 2888, 1461, 1382, 1252, 1152  $\text{cm}^{-1}$ .

Partial data for **minor diastereomer B** of (+)-**3ah** (from the mixture):  **$^1\text{H}$  NMR (500 MHz,  $\text{CDCl}_3$ )**  $\delta$  7.19-7.37 (7H, m, Ar), 6.90 (2H, d,  $J = 8.7$  Hz, Ar), 6.21 (1H, dt,  $J = 17.0, 10.3$  Hz, 9-H), 5.84 (1H, dd,  $J = 15.3, 10.4$  Hz, 8-H), 5.38-5.48 (1H, m, 7-H), 5.03 (1H, dd,  $J = 16.8, 1.7$  Hz, 10- $\text{H}_\text{A}$ ), 4.94 (1H, dd,  $J = 10.0, 1.8$  Hz, 10- $\text{H}_\text{B}$ ), 4.66 (1H, d,  $J = 8.5$  Hz, 2-H), 4.51 (1H, dd,  $J = 8.7, 6.2$  Hz, 5- $\text{H}_\text{A}$ ), 4.26 (1H, dd,  $J = 8.6, 3.7$  Hz, 5- $\text{H}_\text{B}$ ), 3.81 (3H, s, OMe), 3.61 (1H, ddd,  $J = 10.3, 6.8, 3.4$  Hz, 4-H), 2.42 (1H, qd,  $J = 8.6, 6.2$  Hz, 3-H), 1.85-1.96 (1H, m, 6- $\text{H}_\text{A}$ ), 1.66-1.77 (1H, m, 6- $\text{H}_\text{B}$ ).  **$^{13}\text{C}$  NMR (125 MHz,  $\text{CDCl}_3$ )**  $\delta$  159.3 (C Ar), 140.4 (C Ar), 137.1 (C-9), 134.5 (C Ar), 132.7 (C-7), 132.6 (C-8), 128.9 (2 x C-H Ar), 128.5 (2 x C-H Ar), 127.8 (2 x C-H Ar), 126.8 (C-H Ar), 115.4 (C-10), 113.95 (2 x C-H Ar), 84.5 (C-2), 74.3 (C-5), 55.5 (OMe), 52.6 (C-3), 48.3 (C-4), 30.6 (C-6).

Racemic ( $\pm$ )-**3ah** (30%, 5:1 dr) was made with the same procedure with racemic alcohol ( $\pm$ )-(*E*)-**1q**.

**8.36. (+)-(2*R*,3*R*,4*S*)-2-(4-Methoxyphenyl)-4-phenyl-3-[(1'*S*)-3-phenylcyclopent-2-en-1-yl]tetrahydrofuran and (+)-(2*S*,3*S*,4*S*)-2-(4-methoxyphenyl)-4-phenyl-3-[(1'*R*)-3-phenylcyclopent-2-en-1-yl]tetrahydrofuran [(+)-**3ai**]**

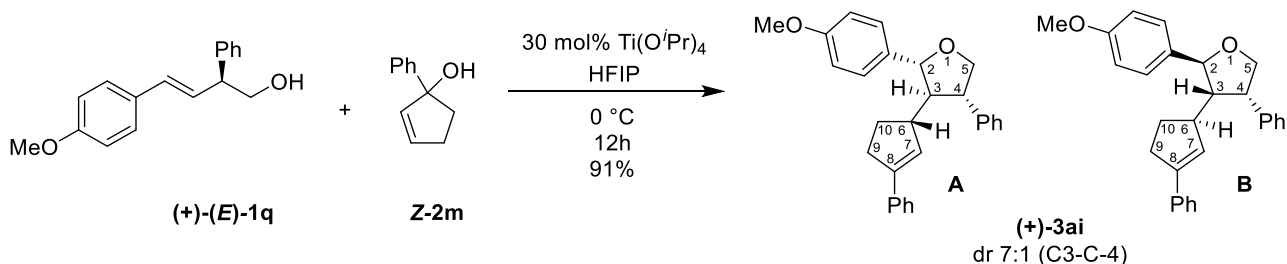

Alcohol (+)-(*E*)-**1q** (30.0 mg, 0.114 mmol) and (*E*)-**2m** (18.2 mg, 0.114 mmol) and  $\text{Ti}(\text{O}^i\text{Pr})_4$  (9.7 mg, 0.034 mmol) were subjected to the general procedure except conducting the reaction at at  $0^\circ\text{C}$  (FCC: gradient elution: 10%  $\rightarrow$  15%  $\text{Et}_2\text{O}$  - pentane) to yield inseparable 7:1 mixture of diastereomers (+)-**3ai** as a yellow oil (41.7 mg, 91%, 99% ee).

Data for **major diastereomer A** of (+)-**3ai** (from the mixture): **R<sub>f</sub>** 0.40 (30%  $\text{Et}_2\text{O}$  - pentane).  $[\alpha]_{\text{D}}^{25} = +57.2$  ( $c = 10.0$ ,  $\text{CHCl}_3$ ).  **$^1\text{H}$  NMR (400 MHz,  $\text{CDCl}_3$ )**  $\delta$  7.19-7.44 (12H, m, Ar), 6.89 (2H, d,  $J = 8.7$  Hz, Ar), 5.95 (1H, q,  $J = 2.0$  Hz, 7-H), 4.73 (1H, d,  $J = 8.9$  Hz, 2-H), 4.27 (1H, t,  $J = 8.5$  Hz, 5- $\text{H}_\text{A}$ ), 4.10 (dd,  $J = 8.8, 7.3$  Hz, 5- $\text{H}_\text{B}$ ), 3.82 (3H, s, OMe), 3.37 (1H, td,  $J = 8.4, 7.3$  Hz, 4-H), 3.11 (1H, dtd,  $J = 11.7, 6.5, 6.0, 2.2$  Hz, 6-H), 2.51-2.65 (3H, m, 3-H and 9- $\text{H}_2$ ), 1.97-2.08 (1H, m, 10- $\text{H}_\text{A}$ ), 1.48-1.56 (1H, m, 10- $\text{H}_\text{B}$ ).  **$^{13}\text{C}$  NMR (100 MHz,  $\text{CDCl}_3$ )**  $\delta$  159.4 (C Ar),

143.5 (C-8), 143.4 (C Ar), 136.4 (C Ar), 134.4 (C Ar), 128.9 (2 x C-H Ar), 128.5 (2 x C-H Ar), 128.39 (2 x C-H Ar), 127.8 (2 x C-H Ar), 127.6 (C-H Ar), 127.3 (C-7), 126.7 (C-H Ar), 125.8 (2 x C-H Ar), 114.0 (2 x C-H Ar), 85.6 (C-2), 76.0 (C-5), 60.1 (C-3), 55.4 (OMe), 50.3 (C-4), 47.1 (C-6), 32.8 (C-9), 27.7 (C-10). **HRMS** (ESI): calculated for  $C_{28}H_{28}O_2Na$   $[M+Na]^+$  requires  $m/z$  419.19815, found  $m/z$  419.19800. **IR** (film)  $\nu_{max}$ : 2980, 1611, 1512, 1381, 1247, 1172  $cm^{-1}$ .

Partial data for **minor diastereomer B of (+)-3ai (from the mixture)**:  **$^1H$  NMR (400 MHz,  $CDCl_3$ )**  $\delta$  7.19-7.44 (12H, m, Ar), 6.89 (2H, d,  $J$  = 8.7 Hz, Ar), 5.93 (1H, q,  $J$  = 2.1 Hz, 7-H), 4.90 (1H, d,  $J$  = 7.8 Hz, 2-H), 4.50 (1H, dd,  $J$  = 8.6, 6.0 Hz, 5- $H_A$ ), 4.22 (1H, dd,  $J$  = 8.6, 3.3 Hz, 5- $H_B$ ), 3.82 (3H, s, OMe), 3.73 (1H, td,  $J$  = 6.1, 3.2 Hz, 4-H), 2.51-2.65 (2H, m, 3-H and 6-H), 2.39-2.49 (2H, m, 9- $H_2$ ), 1.97-2.08 (1H, m, 10- $H_A$ ), 1.48-1.56 (1H, m, 10- $H_B$ ).  **$^{13}C$  NMR (100 MHz,  $CDCl_3$ )**  $\delta$  159.3 (C Ar), 142.9 (C-8), 141.4 (C Ar), 136.5 (C Ar), 135.6 (C Ar), 129.01 (2 x C-H Ar), 128.95 (2 x C-H Ar), 128.7 (C-7), 128.6 (2 x C-H Ar), 128.35 (2 x C-H Ar), 127.2 (C-H Ar), 126.8 (C-H Ar), 125.7 (2 x C-H Ar), 113.9 (2 x C-H Ar), 84.2 (C-2), 74.6 (C-5), 57.1 (C-3), 55.4 (OMe), 49.7 (C-4), 45.8 (C-6), 33.0 (C-9), 29.2 (C-10).

Racemic ( $\pm$ )-**3ai** (91%, 7:1 dr) was made with the same procedure with racemic alcohol ( $\pm$ )-**(E)-1q**.

### 8.37. ( $\pm$ )-(2*S*,3*S*)-3-Cinnamyl-2-phenyltetrahydrofuran (*trans*-**3aj**)

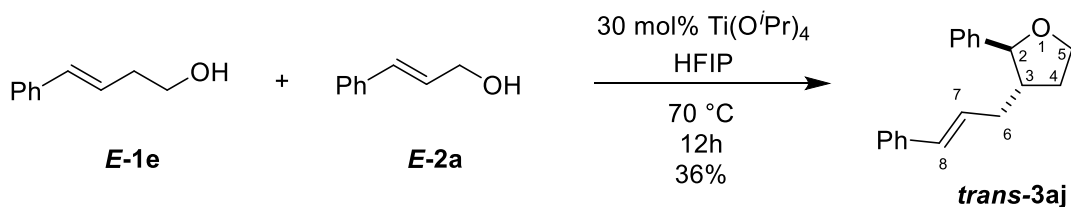

Alcohol **E-1e** (64.3 mg, 0.434 mmol), cinnamyl alcohol **E-2a** (58.0 mg, 0.434 mmol) and  $Ti(O^iPr)_4$  (37.0 mg, 0.130 mmol) were subjected to the general procedure (FCC: gradient elution: 6%  $\rightarrow$  12%  $Et_2O$  - pentane) to yield **trans-3aj** as a colorless oil (40.9 mg, 36%).

Data for **trans-3aj**:  $R_f$  0.40 (20%  $Et_2O$  - pentane).  **$^1H$  NMR (400 MHz,  $CDCl_3$ )**  $\delta$  7.35 (4H, d,  $J$  = 4.3 Hz, Ar), 7.28-7.31 (5H, m, Ar), 7.17-7.24 (1H, m, Ar), 6.42 (1H, d,  $J$  = 15.8 Hz, 8-H), 6.14 (1H, dt,  $J$  = 15.8, 6.9 Hz, 7-H), 4.49 (1H, d,  $J$  = 6.8 Hz, 2-H), 4.14 (1H, dt,  $J$  = 8.4, 7.1 Hz, 5- $H_A$ ), 4.04 (1H, td,  $J$  = 8.3, 4.7 Hz, 5- $H_B$ ), 2.47 (1H, dddd,  $J$  = 11.1, 6.6, 4.3, 1.4 Hz, 6- $H_A$ ), 2.17-2.32 (3H, m, 3-H, 4- $H_A$  and 6- $H_B$ ), 1.78-1.87 (1H, m, 4- $H_B$ ).  **$^{13}C$  NMR (100 MHz,  $CDCl_3$ )**  $\delta$  142.5 (C Ar), 137.5 (C Ar), 131.6 (C-8), 128.6 (2 x CH Ar), 128.5 (2 x CH Ar), 128.4 (C-7), 127.6 (CH Ar), 127.2 (CH Ar), 126.4 (2 x CH Ar), 126.1 (2 x CH Ar), 86.1 (C-2), 68.2 (C-5), 48.2 (C-3), 35.7 (C-6), 32.5 (C-4). **NOESY- 2D (400 MHz,  $CDCl_3$ )**: between 2-H and 6- $H_A$ , between 2-H and 6- $H_B$ . **HRMS** (ESI): calculated for  $C_{19}H_{21}O$   $[M+H]^+$  requires  $m/z$  265.15869, found  $m/z$  265.15872. **IR** (film)  $\nu_{max}$  : 3657, 2980, 1451, 1251, 1153, 964  $cm^{-1}$ .

**8.38. (±)-(2*S*,3*R*)-3-Cinnamyl-2-phenyltetrahydrofuran and (±)-(2*S*,3*S*)-3-Cinnamyl-2-phenyltetrahydrofuran (*cis*-**3aj** and *trans*-**3aj**)**

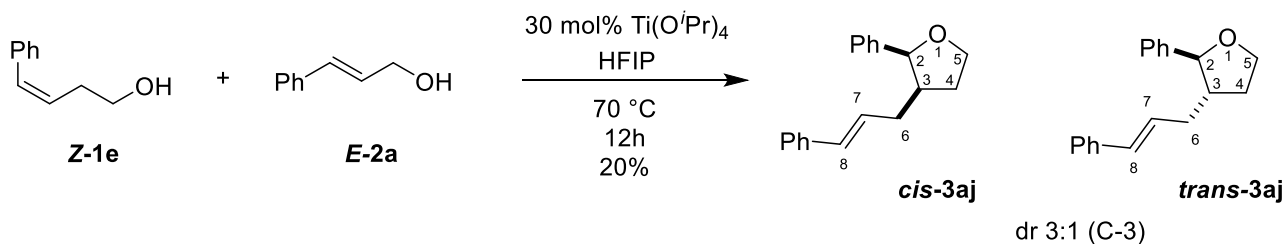

Alcohol **Z-1e** (53.5 mg, 0.361 mmol), cinnamyl alcohol **E-2a** (48.4 mg, 0.361 mmol) and  $\text{Ti}(\text{O}^i\text{Pr})_4$  (30.1 mg, 0.106 mmol) were subjected to the general procedure (FCC: gradient elution: 6%  $\rightarrow$  12%  $\text{Et}_2\text{O}$  - pentane) to yield *cis*-**3aj**: *trans*-**3aj** as 3:1 dr mixture (19.7 mg, 20%), which was partially separable into 2 fractions: first fraction of *cis*-**3aj** (7.4 mg, 8%) as a colorless oil, and second fraction of 1.5:1 of diastereomers *cis*-**3aj** : *trans*-**3aj** as a colorless oil (12.3 mg, 12%).

Data for *cis*-**3aj**: **R<sub>f</sub>** 0.40 (20%  $\text{Et}_2\text{O}$  - pentane).  $^1\text{H}$  NMR (400 MHz,  $\text{CDCl}_3$ )  $\delta$  7.23-7.38 (8H, m, Ar), 7.17-7.23 (2H, m, Ar), 6.25 (1H, d,  $J$  = 15.8 Hz, 8-H), 6.01 (1H, ddd,  $J$  = 15.8, 7.9, 6.3 Hz, 7-H), 5.06 (1H, d,  $J$  = 6.7 Hz, 2-H), 4.22 (1H, td,  $J$  = 8.1, 5.1 Hz, 5- $\text{H}_\text{A}$ ), 3.95 (1H, q,  $J$  = 7.7 Hz, 5- $\text{H}_\text{B}$ ), 2.56 (1H, dqd,  $J$  = 11.2, 6.6, 4.7 Hz, 3-H), 2.17-2.22 (1H, m, 4- $\text{H}_\text{A}$ ), 1.85-1.97 (2H, m, 4- $\text{H}_\text{B}$  and 6- $\text{H}_\text{A}$ ), 1.54-1.74 (1H, m, 6- $\text{H}_\text{B}$ ).  $^{13}\text{C}$  NMR (100 MHz,  $\text{CDCl}_3$ )  $\delta$  140.6 (C Ar), 137.7 (C Ar), 131.2 (C-8), 129.2 (C-7), 128.6 (2 x CH Ar), 128.2 (2 x CH Ar), 127.2 (CH Ar), 127.1 (CH Ar), 126.6 (2 x CH Ar), 126.0 (2 x CH Ar), 83.4 (C-2), 67.6 (C-5), 43.5 (C-3), 33.7 (C-6), 31.1 (C-4). **NOESY- 2D** (400 MHz,  $\text{CDCl}_3$ ): between 2-H and 3-H. **HRMS** (ESI): calculated for  $\text{C}_{19}\text{H}_{21}\text{O}$   $[\text{M}+\text{H}]^+$  requires  $m/z$  265.15869, found  $m/z$  265.15875. **IR** (film)  $\nu_{\text{max}}$  : 3657, 2980, 2888, 1382, 1152, 954  $\text{cm}^{-1}$ .

Data for *trans*-**3aj** matched those previously reported.

**9. General procedure for the hydrogenation of an alkene.**

Heterocycle **3** (1 eq.), EtOAc (2 mL) and 10 wt. % of Pd/C (10 wt. %) were added to a two-necked r.b.f. The flask was submerged in an ice bath, and then evacuated and backfilled with hydrogen five times. The reaction mixture was stirred vigorously under hydrogen atmosphere (balloon pressure) at 0°C for 2 hours. The reaction mixture was filtered through celite and flushed with EtOAc. The crude product was then concentrated in vacuo, and purified by flash column chromatography to afford the corresponding products.

### 9.1. (±)-(2*S*,3*R*)-3-Cyclohexyl-2-(4-methoxyphenyl)tetrahydrofuran (**6a**)

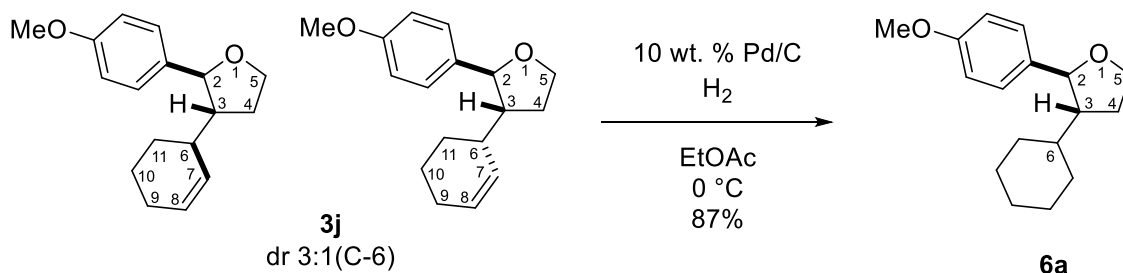

Alkene **3j** (31.0 mg, 0.120 mmol), Pd/C (3.1 mg) and EtOAc (2 mL) were subjected to the general procedure (FCC: gradient elution: 7% → 15% Et<sub>2</sub>O - pentane) to yield **6a** as a colorless oil (27.2 mg, 87%).

Data for **6a**: *R<sub>f</sub>* 0.40 (40% Et<sub>2</sub>O - pentane). <sup>1</sup>H NMR (400 MHz, CDCl<sub>3</sub>) δ 7.26 (2H, d, *J* = 8.6 Hz, Ar), 6.87 (2H, d, *J* = 8.7 Hz, Ar), 4.54 (1H, d, *J* = 7.7 Hz, 2-H), 4.02 (1H, q, *J* = 8.3 Hz, 5-H<sub>A</sub>), 3.91 (1H, td, *J* = 8.1, 4.6 Hz, 5-H<sub>B</sub>), 3.80 (3H, s, OMe), 2.10 (1H, dddd, *J* = 11.4, 8.0, 6.8, 4.6 Hz, 4-H<sub>A</sub>), 1.96-2.05 (1H, m, 3-H), 1.80-1.87 (1H, m, 4-H<sub>B</sub>), 1.70-1.80 (2H, m, 2 x CH cyclohexyl), 1.53-1.65 (2H, m, 2 x CH cyclohexyl), 1.29-1.39 (1H, m, 6-H), 1.06-1.28 (4H, m, 2 x CH<sub>2</sub> cyclohexyl), 0.96-1.05 (1H, m, CH cyclohexyl), 0.79-0.91 (1H, m, CH cyclohexyl). <sup>13</sup>C NMR (100 MHz, CDCl<sub>3</sub>) δ 159.0 (C Ar), 135.5 (C Ar), 128.2 (2 x CH Ar), 113.8 (2 x CH Ar), 84.1 (C-2), 68.0 (C-5), 55.4 (OMe), 52.9 (C-3), 39.9 (C-6), 32.7 (CH<sub>2</sub> cyclohexyl), 30.5 (CH<sub>2</sub> cyclohexyl), 30.3 (C-4), 26.6 (CH<sub>2</sub> cyclohexyl), 26.53 (CH<sub>2</sub> cyclohexyl), 26.49 (CH<sub>2</sub> cyclohexyl). HRMS (ESI): calculated for C<sub>17</sub>H<sub>24</sub>O<sub>2</sub>Na [M+Na]<sup>+</sup> requires *m/z* 283.16685, found *m/z* 283.16675. IR (film) ν<sub>max</sub> : 2980, 1764, 1612, 1514, 1247, 1161 cm<sup>-1</sup>.

### 9.2. (±)-(2*S*,3*R*)-3-Cyclopentyl-2-(4-methoxyphenyl)tetrahydrofuran (**6b**)

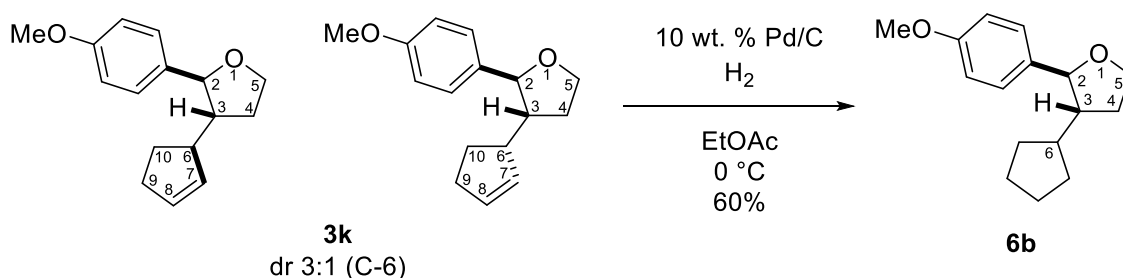

Alkene **3k** (30.0 mg, 0.122 mmol), Pd/C (3.0 mg) and EtOAc (2 mL) were subjected to the general procedure (FCC: gradient elution: 7% → 15% Et<sub>2</sub>O - pentane) to yield **6b** as a colorless oil (18.1 mg, 60%).

Data for **6b**: *R<sub>f</sub>* 0.40 (40% Et<sub>2</sub>O - pentane). <sup>1</sup>H NMR (400 MHz, CDCl<sub>3</sub>) δ 7.26 (2H, d, *J* = 8.7 Hz, Ar), 6.86 (2H, d, *J* = 8.7 Hz, Ar), 4.46 (1H, d, *J* = 7.4 Hz, 2-H), 4.06 (1H, q, *J* = 8.3 Hz, 5-H<sub>A</sub>), 3.94 (1H, td, *J* = 8.2, 5.1 Hz, 5-H<sub>B</sub>), 3.80 (3H, s, OMe), 2.11-2.20 (1H, m, 4-H<sub>A</sub>), 2.06 (1H, quint, *J* = 7.7 Hz, 3-H), 1.75-1.84 (3H, m, 4-H<sub>B</sub>, 6-H and CH cyclopentyl), 1.42-1.66 (5H, m, CH



cyclopentyl and 2 x CH<sub>2</sub> cyclopentyl), 1.16-1.28 (1H, m, CH cyclopentyl), 0.85-0.96 (1H, m, CH cyclopentyl). **<sup>13</sup>C NMR (100 MHz, CDCl<sub>3</sub>)**  $\delta$  159.1 (C Ar), 135.2 (C Ar), 128.2 (2 x CH Ar), 113.8 (2 x CH Ar), 85.9 (C-2), 67.9 (C-5), 55.4 (OMe), 52.8 (C-3), 42.7 (C-6), 31.8 (CH<sub>2</sub> cyclopentyl), 31.6 (C-4), 31.0 (CH<sub>2</sub> cyclopentyl), 25.5 (CH<sub>2</sub> cyclopentyl), 25.0 (CH<sub>2</sub> cyclopentyl). **HRMS (ESI):** calculated for C<sub>16</sub>H<sub>22</sub>O<sub>2</sub>Na [M+Na]<sup>+</sup> requires  $m/z$  269.15120, found  $m/z$  269.15128. **IR (film)**  $\nu_{\max}$  : 2980, 1764, 1514, 1246, 1169, 1032 cm<sup>-1</sup>.

**9.3. (+)-(2R,3R,4S)-2-(4-Methoxyphenyl)-4-phenyl-3-[(1'S,3'R)-3-phenylcyclopentyl]tetrahydrofuran and (+)-(2S,3S,4S)-2-(4-methoxyphenyl)-4-phenyl-3-[(1'R,3'S)-3-phenylcyclopentyl]tetrahydrofuran [(+)-6c]**

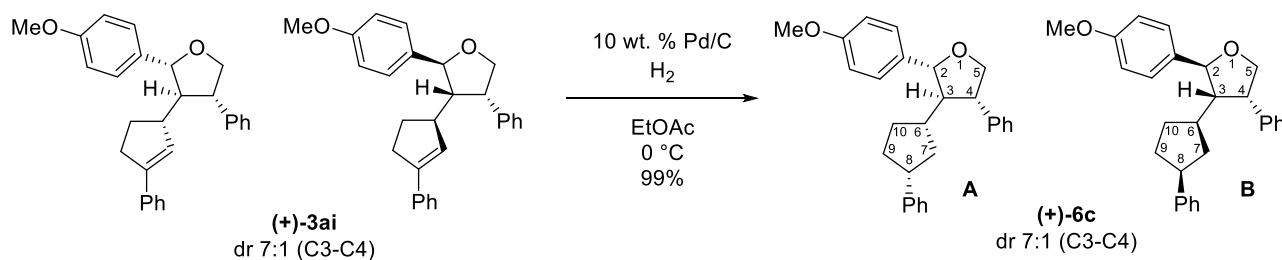

Alkene (+)-**3ai** (36.3 mg, 0.0917 mmol), Pd/C (3.6 mg) and EtOAc (2 mL) were subjected to the general procedure (FCC: gradient elution: 6% → 8% Et<sub>2</sub>O - pentane) to yield an inseparable 7:1 mixture of diastereomer (+)-**6c** as a colorless oil (38.9 mg, 99%).

Data for **major diastereomer A of (+)-6c (from the mixture)**:  $R_f$  0.50 (25% Et<sub>2</sub>O - pentane).  $[\alpha]_D^{25} = +52.8$  ( $c = 4.2$ , CHCl<sub>3</sub>). **<sup>1</sup>H NMR (500 MHz, CDCl<sub>3</sub>)**  $\delta$  7.40 (2H, d,  $J = 8.7$  Hz, Ar), 7.19-7.38 (7H, m, Ar), 7.08-7.17 (3H, m, Ar), 6.92 (2H, d,  $J = 8.7$  Hz, Ar), 4.64 (1H, d,  $J = 8.4$  Hz, 2-H), 4.23 (1H, dd,  $J = 8.9, 8.0$  Hz, 5-H<sub>A</sub>), 4.08 (1H, dd,  $J = 8.9, 6.3$  Hz, 5-H<sub>B</sub>), 3.83 (3H, s, OMe), 3.34 (1H, td,  $J = 7.9, 6.3$  Hz, 4-H), 2.96 (1H, dtd,  $J = 11.5, 9.0, 6.3$  Hz, 8-H), 2.46 (1H, q,  $J = 8.0$  Hz, 3-H), 2.15-2.26 (1H, m, 6-H), 2.10 (1H, dt,  $J = 12.3, 6.2$  Hz, 7-H<sub>A</sub>), 1.91-2.04 (1H, m, 9-H<sub>A</sub>), 1.70 (1H, dddd,  $J = 14.2, 9.3, 8.1, 6.1$  Hz, 10-H<sub>A</sub>), 1.46-1.55 (1H, m, 9-H<sub>B</sub>), 1.24 (1H, q,  $J = 11.9$  Hz, 7-H<sub>B</sub>), 1.13-1.21 (1H, m, 10-H<sub>B</sub>). **<sup>13</sup>C NMR (125 MHz, CDCl<sub>3</sub>)**  $\delta$  159.44 (C Ar), 146.0 (C Ar), 144.4 (C Ar), 134.2 (C Ar), 128.87 (2 x CH Ar), 128.85 (2 x CH Ar), 128.38 (2 x CH Ar), 127.7 (2 x CH Ar), 127.10 (2 x CH Ar), 126.6 (CH Ar), 126.0 (CH Ar), 114.0 (2 x CH Ar), 87.1 (C-2), 75.9 (C-5), 60.7 (C-3), 55.4 (OMe), 51.8 (C-4), 45.4 (C-8), 43.5 (C-8), 43.5 (C-6), 40.4 (C-7), 33.55 (C-9), 30.2 (C-10). **NOESY-2D (500 MHz, CDCl<sub>3</sub>)**: between 2-H and 4-H, between 2-H and 6-H, between 2-H and 7-H<sub>A</sub>, between 6-H and 8-H. **HRMS (ESI):** calculated for C<sub>28</sub>H<sub>30</sub>O<sub>2</sub>Na [M+Na]<sup>+</sup> requires  $m/z$  421.21380, found  $m/z$  421.21384. **IR (film)**  $\nu_{\max}$  : 2980, 2888, 1513, 1461, 1382, 1249 cm<sup>-1</sup>.

Partial data for **minor diastereomer B (+)-6c (from the mixture)**: **<sup>1</sup>H NMR (500 MHz, CDCl<sub>3</sub>)**  $\delta$  7.40 (2H, d,  $J = 8.7$  Hz, Ar), 7.19-7.38 (7H, m, Ar), 7.08-7.17 (3H, m, Ar), 6.92 (2H, d,  $J$

= 8.7 Hz, Ar), 4.86 (2H, d,  $J$  = 9.2 Hz, 2-H), 4.49 (1H, dd,  $J$  = 8.5, 5.8 Hz, 5-H<sub>A</sub>), 4.13 (1H, dd,  $J$  = 8.6, 2.2 Hz, 5-H<sub>B</sub>), 3.83 (3H, s, OMe), 3.53-3.60 (1H, m, 4-H), 2.70-2.80 (1H, m, 8-H), 2.55 (1H, td,  $J$  = 9.6, 6.9 Hz, 3-H), 2.06-2.16 (1H, m, 7-H<sub>A</sub>), 1.91-2.04 (1H, m, 9-H<sub>A</sub>), 1.75-1.81 (1H, m, 10-H<sub>A</sub>), 1.62-1.66 (1H, m, 6-H), 1.40-1.46 (1H, m, 9-H<sub>B</sub>), 1.20-1.29 (1H, m, 7-H<sub>B</sub>), 1.11-1.19 (1H, m, 10-H<sub>B</sub>). **<sup>13</sup>C NMR (125 MHz, CDCl<sub>3</sub>)**  $\delta$  159.36 (C Ar), 146.5 (C Ar), 142.0 (C Ar), 135.7 (C Ar), 129.0 (2 x CH Ar), 128.5 (2 x CH Ar), 128.42 (2 x CH Ar), 127.8 (2 x CH Ar), 127.06 (2 x CH Ar), 126.7 (CH Ar), 125.89 (CH Ar), 113.9 (2 x CH Ar), 84.8 (C-2), 75.0 (C-5), 58.4 (C-3), 55.4 (OMe), 50.4 (C-4), 44.8 (C-8), 42.0 (C-7), 40.1 (C-6), 33.63 (C-10), 30.7 (C-9). **NOESY-2D (500 MHz, CDCl<sub>3</sub>)**: between 2-H and 6-H, between 6-H and 8-H.

**10. ( $\pm$ )-2-[(2*S*,3*S*)-2-(4-Methoxyphenyl)-2,3-dihydrobenzofuran-3-yl]acetaldehyde (**7**)**

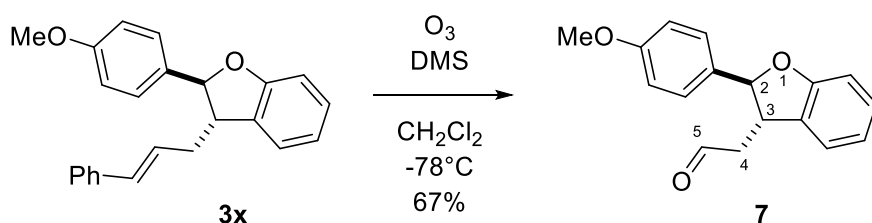

Alkene **3x** (10.0 mg, 0.0292 mmol) and CH<sub>2</sub>Cl<sub>2</sub> were added to a r.b.f. charged with a stirring bar under -78°C. The solution was bubbled with O<sub>3</sub> for 7-10 min until the blue color was observed, leave it for 2-3 min. Then bubbling O<sub>2</sub> for few min. and switch to N<sub>2</sub> bubbling for 3-4 min. until no blue color was seen. DMS was added under dry-ice bath, leave it for 10min. and let it warmed up to r.t. The crude product was then concentrated in vacuo, and then purified by flash column chromatography to afford **7** as a colorless oil (5.3 mg, 67%).

Data for **7**: **R<sub>f</sub>** 0.30 (40% Et<sub>2</sub>O - pentane). **<sup>1</sup>H NMR (500 MHz, CDCl<sub>3</sub>)**  $\delta$  9.84 (1H, s, 5-H), 7.34 (2H, d,  $J$  = 8.6 Hz, Ar), 7.20 (1H, t,  $J$  = 7.7 Hz, Ar), 7.13 (1H, d,  $J$  = 8.6 Hz, Ar), 6.86-6.92 (4H, m, Ar), 5.25 (1H, d,  $J$  = 6.7 Hz, 2-H), 3.93 (1H, q,  $J$  = 6.7 Hz, 3-H), 3.80 (3H, s, OMe), 2.85-2.99 (2H, m, 4-H<sub>2</sub>). **<sup>13</sup>C NMR (125 MHz, CDCl<sub>3</sub>)**  $\delta$  200.4 (C-5), 159.9 (C Ar), 159.4 (C Ar), 132.5 (C Ar), 129.1 (C-H Ar), 129.0 (C Ar), 127.7 (2 x C-H Ar), 124.6 (C-H Ar), 121.2 (C-H Ar), 114.2 (2 x C-H Ar), 109.9 (C-H Ar), 89.6 (C-2), 55.5 (OMe), 49.0 (C-3), 44.9 (C-4). **HRMS (ESI)**: calculated for C<sub>17</sub>H<sub>17</sub>O<sub>3</sub> [M+H]<sup>+</sup> requires  $m/z$  269.11722, found  $m/z$  269.11731. **IR (film)**  $\nu_{\max}$ : 3649, 2980, 2360, 1382, 1251, 1152 cm<sup>-1</sup>.

**11. General procedure for the Ru-catalyzed oxidation of aromatic rings to carboxylic acids**

To a cold (0°C) solution of cyclobutane in 10.0 mL/mmol of a 2:2:3 mixture of CCl<sub>4</sub>:MeCN:pH 7 buffer (Na<sub>2</sub>HPO<sub>4</sub>), NaIO<sub>4</sub> (20.0 equiv) was added in one portion. The mixture was stirred at that temperature for 15 min and RuCl<sub>3</sub> (5 mol%) was added in one portion. The

mixture was warmed up to room temperature. The reaction was monitored by TLC until completion, diluted with Et<sub>2</sub>O and H<sub>2</sub>O and extracted with Et<sub>2</sub>O (3 x 3 mL/mmol). The water layer was acidified until pH 1 using concentrated HCl, and extracted with Et<sub>2</sub>O (3 x 3 mL/mmol). The combined organic layers were dried using Na<sub>2</sub>SO<sub>4</sub>, filtered and the solvent was evaporated under reduced pressure to give the corresponding carboxylic acid, that was purified by chromatography on silica gel using the appropriate mixture of eluents.

### 11.1. (±)-(2*S*,3*R*)-3-Benzhydryltetrahydrofuran-2-carboxylic acid (**8**)

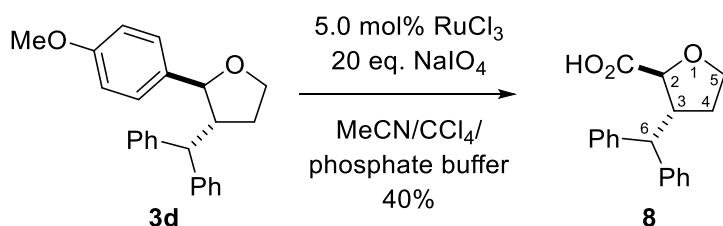

Tetrahydrofurane **3d** (49.0 mg, 0.142 mmol), RuCl<sub>3</sub> (1.5 mg, 0.0071 mmol), NaIO<sub>4</sub> (0.588 g, 2.84 mmol) and CCl<sub>4</sub>:MeCN: Na<sub>2</sub>HPO<sub>4</sub> buffer (3 mL) were subjected to the general procedure (FCC: 5% DCM - MeOH) to yield **8** (16.0 mg, 40%) as a colorless oil.

Data for **8**: *R<sub>f</sub>* 0.20 (10% DCM - MeOH). <sup>1</sup>H NMR (500 MHz, CDCl<sub>3</sub>) δ 7.38 (2H, d, *J* = 7.6 Hz, Ar), 7.24-7.33 (6H, m, Ar), 7.16-7.21 (2H, m, Ar), 4.28 (1H, d, *J* = 2.4 Hz, 2-H), 4.03-4.14 (2H, m, 5-H<sub>2</sub>), 3.87 (1H, d, *J* = 11.9 Hz, 6-H), 3.51 (1H, ddt, *J* = 12.0, 7.7, 2.5 Hz, 3-H), 1.96-2.06 (1H, m, 4-H<sub>A</sub>), 1.69-1.76 (1H, m, 4-H<sub>B</sub>). <sup>13</sup>C NMR (125 MHz, CDCl<sub>3</sub>) δ 175.5 (C=O), 143.2 (C Ar), 142.9 (C Ar), 129.0 (2 x C-H Ar), 128.9 (2 x C-H Ar), 128.4 (2 x C-H Ar), 128.2 (2 x C-H Ar), 127.0 (C-H Ar), 126.9 (C-H Ar), 80.6 (C-2), 68.8 (C-5), 54.4 (C-6), 47.5 (C-3), 29.5 (C-4). NOESY-2D (500 MHz, CDCl<sub>3</sub>): between 2-H and 6-H. HRMS (ESI): calculated for C<sub>18</sub>H<sub>18</sub>O<sub>3</sub>Na [M+Na]<sup>+</sup> requires *m/z* 305.11482, found *m/z* 305.11484. IR (film) ν<sub>max</sub>: 3658, 2980, 2888, 1461, 1461, 1252 cm<sup>-1</sup>.

### 11.2. (±)-2-[(2*S*,3*R*)-2-Phenyltetrahydrofuran-3-yl]acetic acid (**9**)

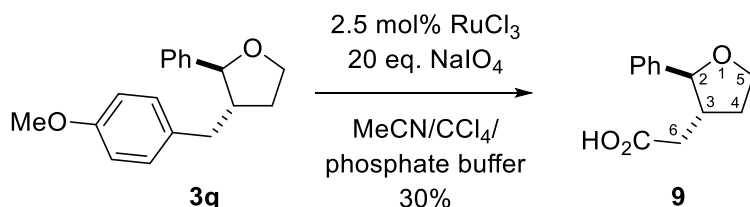

Tetrahydrofurane **3q** (80.0 mg, 0.299 mmol), RuCl<sub>3</sub> (1.6 mg, 0.0075 mmol), NaIO<sub>4</sub> (1.270 g, 5.937 mmol) and CCl<sub>4</sub>:MeCN: Na<sub>2</sub>HPO<sub>4</sub> buffer (3 mL) were subjected to the general procedure except using 2.5mol% of RuCl<sub>3</sub> (FCC: 5% DCM - MeOH) to yield **9** (18.8 mg, 30%) as a colorless oil.

Data for **9**:  $R_f$  0.20 (5% DCM - MeOH).  $^1\text{H}$  NMR (400 MHz,  $\text{CDCl}_3$ )  $\delta$  7.31-7.35 (4H, m, Ar), 7.25-7.30 (1H, m, Ar), 4.45 (1H, d,  $J$  = 7.3 Hz, 2-H), 4.16 (1H, dt,  $J$  = 8.4, 7.3 Hz, 5- $\text{H}_\text{A}$ ), 4.04 (1H, td,  $J$  = 8.4, 5.1 Hz, 5- $\text{H}_\text{B}$ ), 2.56 (1H, dd,  $J$  = 15.0, 4.5 Hz, 6- $\text{H}_\text{A}$ ), 2.42-2.51 (1H, m, 3-H), 2.31-2.41 (2H, m, 4- $\text{H}_\text{A}$  and 6- $\text{H}_\text{B}$ ), 1.79 (1H, dq,  $J$  = 12.3, 7.8 Hz, 4- $\text{H}_\text{B}$ ).  $^{13}\text{C}$  NMR (100 MHz,  $\text{CDCl}_3$ )  $\delta$  177.7 (C=O), 141.3 (C Ar), 128.6 (2 x C-H Ar), 128.0 (C-H Ar), 126.4 (2 x C-H Ar), 85.7 (C-2), 68.0 (C-5), 44.2 (C-3), 36.2 (C-6), 32.3 (C-4). HRMS (ESI): calculated for  $\text{C}_{12}\text{H}_{13}\text{O}_3$   $[\text{M}-\text{H}]^+$  requires  $m/z$  205.08702, found  $m/z$  205.08693. IR (film)  $\nu_{\text{max}}$ : 3658, 2980, 2888, 1461, 1461, 1252  $\text{cm}^{-1}$ .

## 12. General procedure for the acylation and alkylation of a lactone.

To a solution of diisopropylamine (1.15 eq.) in dry THF (1.92 mL/mmol) at  $-78^\circ\text{C}$  was added *n*-butyllithium (2.5 M in hexanes, 1.10 eq.) dropwise. The solution was stirred at  $0^\circ\text{C}$  for 30 min and then cooled to  $-78^\circ\text{C}$  at which time lactone (1eq.) in THF (0.22 mL/mmol) was added over 10 min. The mixture was stirred at  $-78^\circ\text{C}$  for 0.5 hours and electrophile (1.0-1.5 eq.) was added quickly. The mixture was allowed to warm to room temperature, stirred for 3 hours, and quenched with saturated aqueous  $\text{NH}_4\text{Cl}$ . The mixture was extracted with  $\text{Et}_2\text{O}$  (50 mL  $\times$  3), and the organic phase was washed with brine, dried over  $\text{Na}_2\text{SO}_4$  and concentrated. The residue was purified by column chromatography on silica gel to give the corresponding product.

### 12.1. ( $\pm$ )-(3*S*,4*S*,5*S*)-3-Benzyl-4-cinnamyl-5-(4-methoxyphenyl)dihydrofuran-2(3*H*)-one (**10a**)

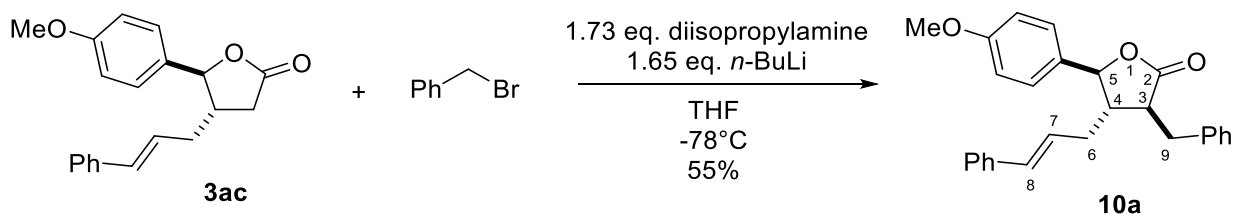

Lactone **3ac** (50.0 mg, 0.162 mmol), benzyl bromide (41.5 mg, 0.243 mmol), diisopropylamine (28.3 mg, 0.280 mmol) and *n*-BuLi (2.5M, 0.11 mL) were subjected to the general procedure (FCC: gradient elution: 15%  $\rightarrow$  25%  $\text{Et}_2\text{O}$  - pentane) to yield **10a** as a colorless oil (35.4 mg, 55%).

Data for **10a**:  $R_f$  0.50 (60%  $\text{Et}_2\text{O}$  - pentane).  $^1\text{H}$  NMR (500 MHz,  $\text{CDCl}_3$ )  $\delta$  7.16-7.34 (10H, m, Ar), 7.03 (2H, d,  $J$  = 8.7 Hz, Ar), 6.81 (2H, d,  $J$  = 8.7 Hz, Ar), 6.21 (1H, d,  $J$  = 15.7 Hz, 8-H), 5.84 (1H, dt,  $J$  = 15.4, 7.4 Hz, 7-H), 4.95 (1H, d,  $J$  = 9.0 Hz, 5-H), 3.77 (3H, s, OMe), 3.17 (1H, dd,  $J$  = 14.0, 5.2 Hz, 9- $\text{H}_\text{A}$ ), 3.07 (1H, dd,  $J$  = 14.0, 6.6 Hz, 9- $\text{H}_\text{B}$ ), 2.86 (1H, ddd,  $J$  = 10.5, 6.5, 5.2 Hz, 3-H), 2.34 (1H, ddt,  $J$  = 10.6, 8.8, 5.9 Hz, 4-H), 2.20-2.27 (2H, m, 6- $\text{H}_2$ ).  $^{13}\text{C}$  NMR (125 MHz,  $\text{CDCl}_3$ )  $\delta$  177.7 (C=O), 160.1 (C Ar), 138.0 (C Ar), 136.7 (C Ar), 133.5 (C-8), 130.2 (C Ar), 129.7 (2 x C-H Ar), 128.9 (2 x C-H Ar), 128.7 (2 x C-H Ar), 128.3 (2 x C-H Ar), 127.7 (C-H Ar), 127.0 (C-H Ar), 126.2 (2 x C-H Ar), 125.3 (C-7), 114.2 (2 x C-H Ar), 83.9 (C-5), 55.5 (OMe), 48.3 (C-4),

47.0 (C-3), 35.3 (C-9), 33.9 (C-6). **NOESY-2D (500 MHz, CDCl<sub>3</sub>)**: between 5-H and 6-H<sub>2</sub>, between 5-H and 7-H, between 5-H and 8-H, between 5-H and 3-H, between 3-H and 6-H<sub>2</sub>. **HRMS (ESI)**: calculated for C<sub>27</sub>H<sub>26</sub>O<sub>3</sub>Na [M+Na]<sup>+</sup> requires *m/z* 421.17742, found *m/z* 421.17722. **IR (film)**  $\nu_{\text{max}}$ : 2980, 1764, 1514, 1248, 1160, 1030 cm<sup>-1</sup>.

## 12.2. (±)-Methyl-(3*R*,4*S*,5*S*)-4-cinnamyl-5-(4-methoxyphenyl)-2-oxotetrahydrofuran-3-carboxylate (**10b**)

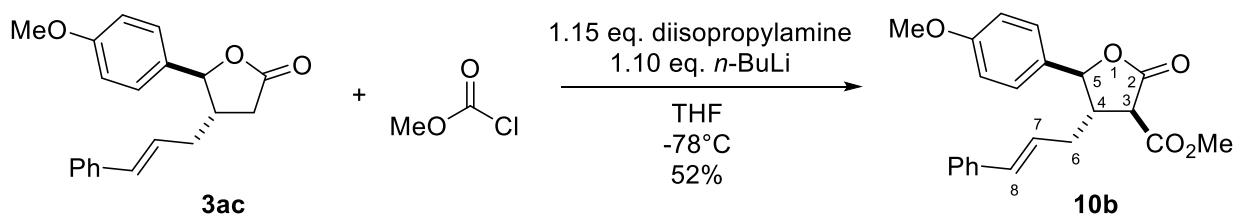

Lactone **3ac** (40.0 mg, 0.130 mmol), methyl chloroformate (18.3 mg, 0.195 mmol), diisopropylamine (15.2 mg, 0.149 mmol) and *n*-BuLi (2.5M, 0.057 mL) were subjected to the general procedure (FCC: gradient elution: 25% → 35% Et<sub>2</sub>O - pentane) to yield **10b** as a colorless oil (24.7 mg, 52%).

Data for **10b**: **R<sub>f</sub>** 0.50 (70% Et<sub>2</sub>O - pentane). **<sup>1</sup>H NMR (500 MHz, CDCl<sub>3</sub>)**  $\delta$  7.34 (2H, d, *J* = 8.7 Hz, Ar), 7.19-7.30 (5H, m, Ar), 6.94 (2H, d, *J* = 8.7 Hz, Ar), 6.43 (1H, d, *J* = 15.6 Hz, 8-H), 5.95 (1H, ddd, *J* = 15.8, 8.4, 6.5 Hz, 7-H), 5.03 (1H, d, *J* = 9.8 Hz, 5-H), 3.83 (3H, s, OMe), 3.66 (3H, s, OMe), 3.54 (1H, d, *J* = 11.7 Hz, 3-H), 3.14 (1H, dddd, *J* = 11.7, 9.8, 8.5, 5.0 Hz, 4-H), 2.47-2.56 (1H, m, 6-H<sub>A</sub>), 2.29-2.38 (1H, m, 6-H<sub>B</sub>). **<sup>13</sup>C NMR (125 MHz, CDCl<sub>3</sub>)**  $\delta$  170.8 (C=O), 168.2 (C=O), 160.5 (C Ar), 136.7 (C Ar), 133.6 (C-8), 128.73 (2 x C-H Ar), 128.69 (2 x C-H Ar), 128.6 (C Ar), 127.8 (C-H Ar), 126.3 (2 x C-H Ar), 125.0 (C-7), 114.4 (2 x C-H Ar), 85.0 (C-5), 55.5 (OMe), 53.3 (C-3), 53.1 (OMe), 48.9 (C-4), 33.8 (C-6). **NOESY-2D (500 MHz, CDCl<sub>3</sub>)**: between 5-H and 6-H<sub>A</sub>, between 5-H and 6-H<sub>B</sub>, between 5-H and 7-H, between 5-H and 3-H, between 3-H and 6-H<sub>A</sub>, between 3-H and 6-H<sub>B</sub>. **HRMS (ESI)**: calculated for C<sub>22</sub>H<sub>22</sub>O<sub>5</sub>Na [M+Na]<sup>+</sup> requires *m/z* 389.13594, found *m/z* 389.13577. **IR (film)**  $\nu_{\text{max}}$ : 2980, 1777, 1736, 1515, 1250, 1147 cm<sup>-1</sup>.

## 12.3. (±)-(3*S*,4*S*,5*S*)-4-[(2'*E*)-1,3-Diphenylallyl]-3-(4-iodobenzyl)-5-(4-methoxyphenyl)dihydrofuran-2(3*H*)-one (**10c**)

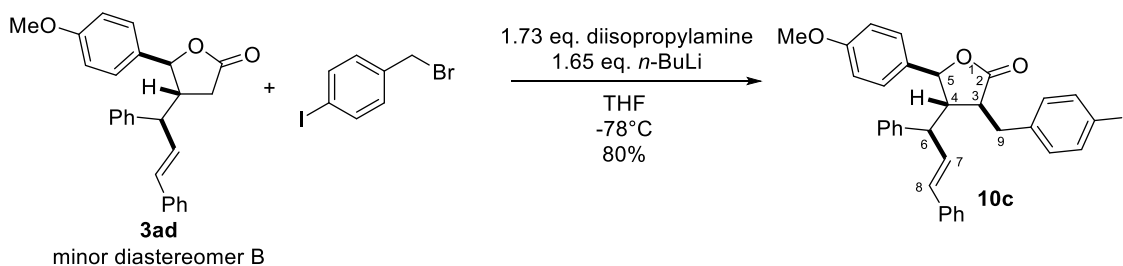

Lactone **3ad-minor diastereomer B** (100.0 mg, 0.2603 mmol), benzyl bromide (77.3 mg, 0.260 mmol), diisopropylamine (45.5 mg, 0.450 mmol) and *n*-BuLi (2.5M, 0.17 mL) were subjected to the general procedure except using 1.73 eq. of diisopropylamine, 1.63 eq. of *n*-BuLi (FCC: gradient elution: 15% → 25% Et<sub>2</sub>O - pentane) to yield **10c** as a white solid (124.8 mg, 80%).

Data for **10c**: **R<sub>f</sub>** 0.40 (50% Et<sub>2</sub>O - pentane). **M.p.**: 78°C (10% EtOAc - pentane). **<sup>1</sup>H NMR (500 MHz, CDCl<sub>3</sub>)** δ 7.52 (2H, d, *J* = 8.2 Hz, Ar), 7.16-7.36 (8H, m, Ar), 7.06-7.10 (2H, m, Ar), 6.72 (2H, d, *J* = 8.2 Hz, Ar), 6.70 (2H, d, *J* = 8.7 Hz, Ar), 6.50 (2H, d, *J* = 8.6 Hz, Ar), 6.43 (1H, d, *J* = 15.6 Hz, 8-H), 5.84 (1H, dd, *J* = 15.6, 9.7 Hz, 7-H), 5.08 (1H, d, *J* = 4.9 Hz, 5-H), 3.78 (3H, s, OMe), 3.43 (1H, t, *J* = 9.7 Hz, 6-H), 2.98 (1H, dt, *J* = 7.8, 5.3 Hz, 3-H), 2.90 (1H, dd, *J* = 13.6, 5.0 Hz, 9-H<sub>A</sub>), 2.81 (1H, dd, *J* = 13.6, 7.9 Hz, 9-H<sub>B</sub>), 2.59-2.66 (1H, m, 4-H). **<sup>13</sup>C NMR (125 MHz, CDCl<sub>3</sub>)** δ 178.2 (C=O), 159.4 (C Ar), 141.1 (C Ar), 138.0 (2 x C-H Ar), 137.4 (C Ar), 136.4 (C Ar), 132.7 (C-8), 132.1 (C Ar), 131.9 (2 x C-H Ar), 129.3 (C-7), 129.2 (2 x C-H Ar), 128.8 (2 x C-H Ar), 128.2 (2 x C-H Ar), 128.0 (C-H Ar), 127.5 (C-H Ar), 126.7 (2 x C-H Ar), 126.5 (2 x C-H Ar), 114.0 (2 x C-H Ar), 92.4 (C Ar), 82.8 (C-5), 55.4 (OMe), 53.8 (C-6), 51.3 (C-4), 46.6 (C-3), 36.3 (C-9). **NOESY-2D (500 MHz, CDCl<sub>3</sub>)**: between 5-H and 3-H, between 5-H and 6-H, between 5-H and 7-H, between 3-H and 6-H. **HRMS** (ESI): calculated for C<sub>33</sub>H<sub>29</sub>IO<sub>3</sub>Na [M+Na]<sup>+</sup> requires *m/z* 623.10536, found *m/z* 623.10535. **IR** (film) *v*<sub>max</sub>: 2980, 2360, 1764, 1461, 1382, 1251 cm<sup>-1</sup>.

### 13. HPLC chromatograms.

Chiral high performance liquid chromatography (HPLC) was performed on Agilent 1200 series instruments using 4.6 mm \* 250 mmL Chiralpak IC columns.

#### i) HPLC traces of (±)-**3af** and (+)-**3af**

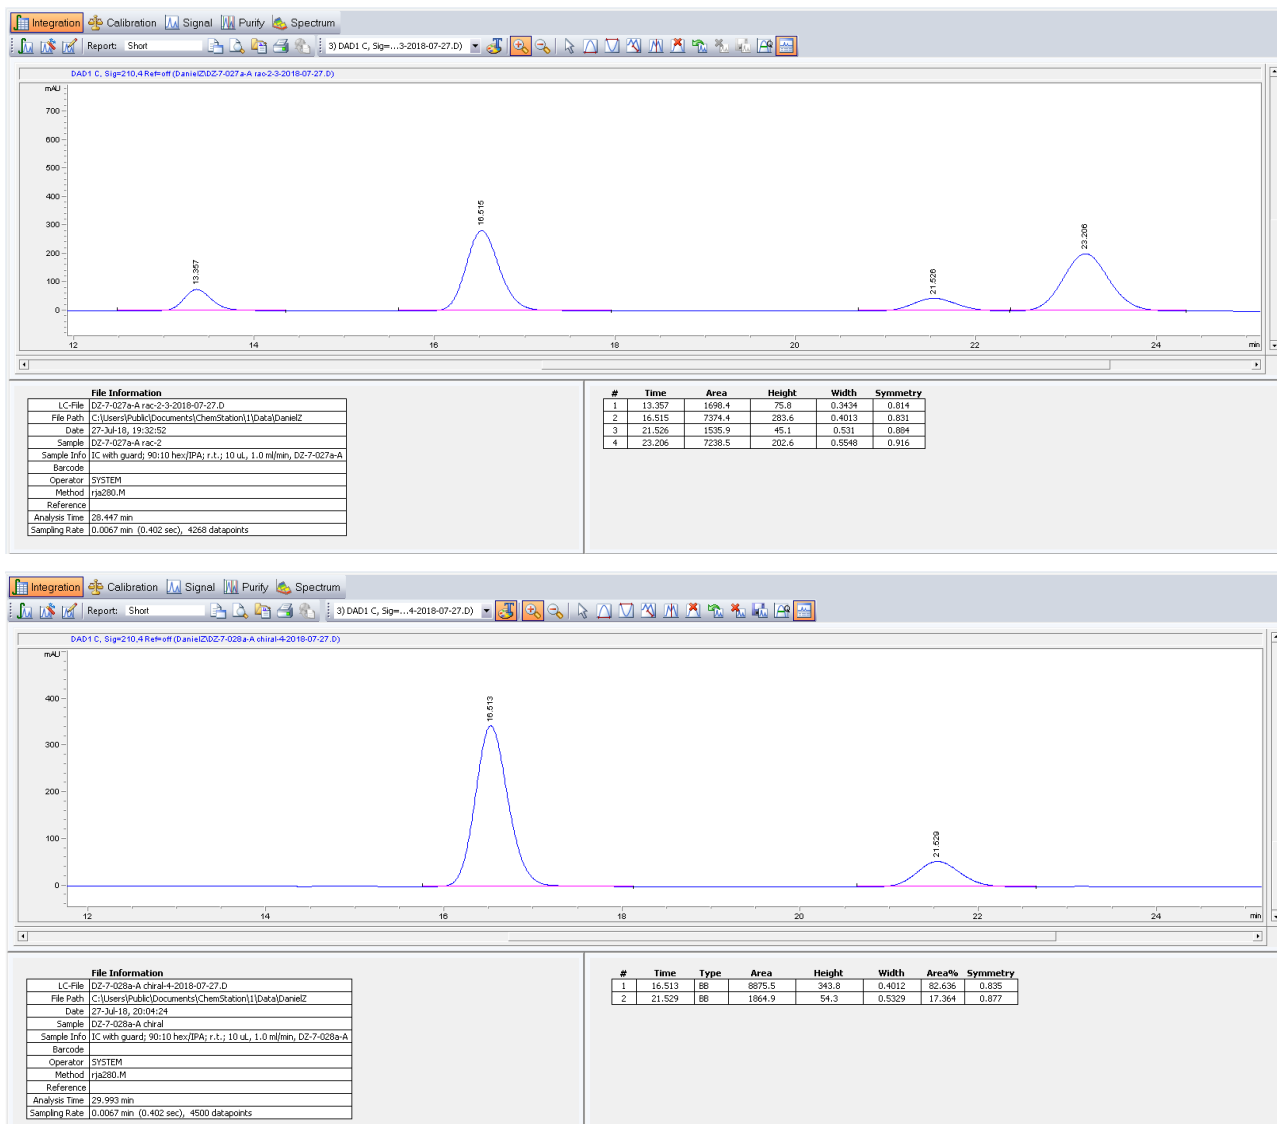

Compound (+)-**3af** was determined to be > 99% ee by chiral HPLC (Chiralpak IC); 90:10 Hexane-*i*-PrOH at 1.0 mL/min; 210 nm.

ii) HPLC traces of (±)-**3ag** and (+)-**3ag**

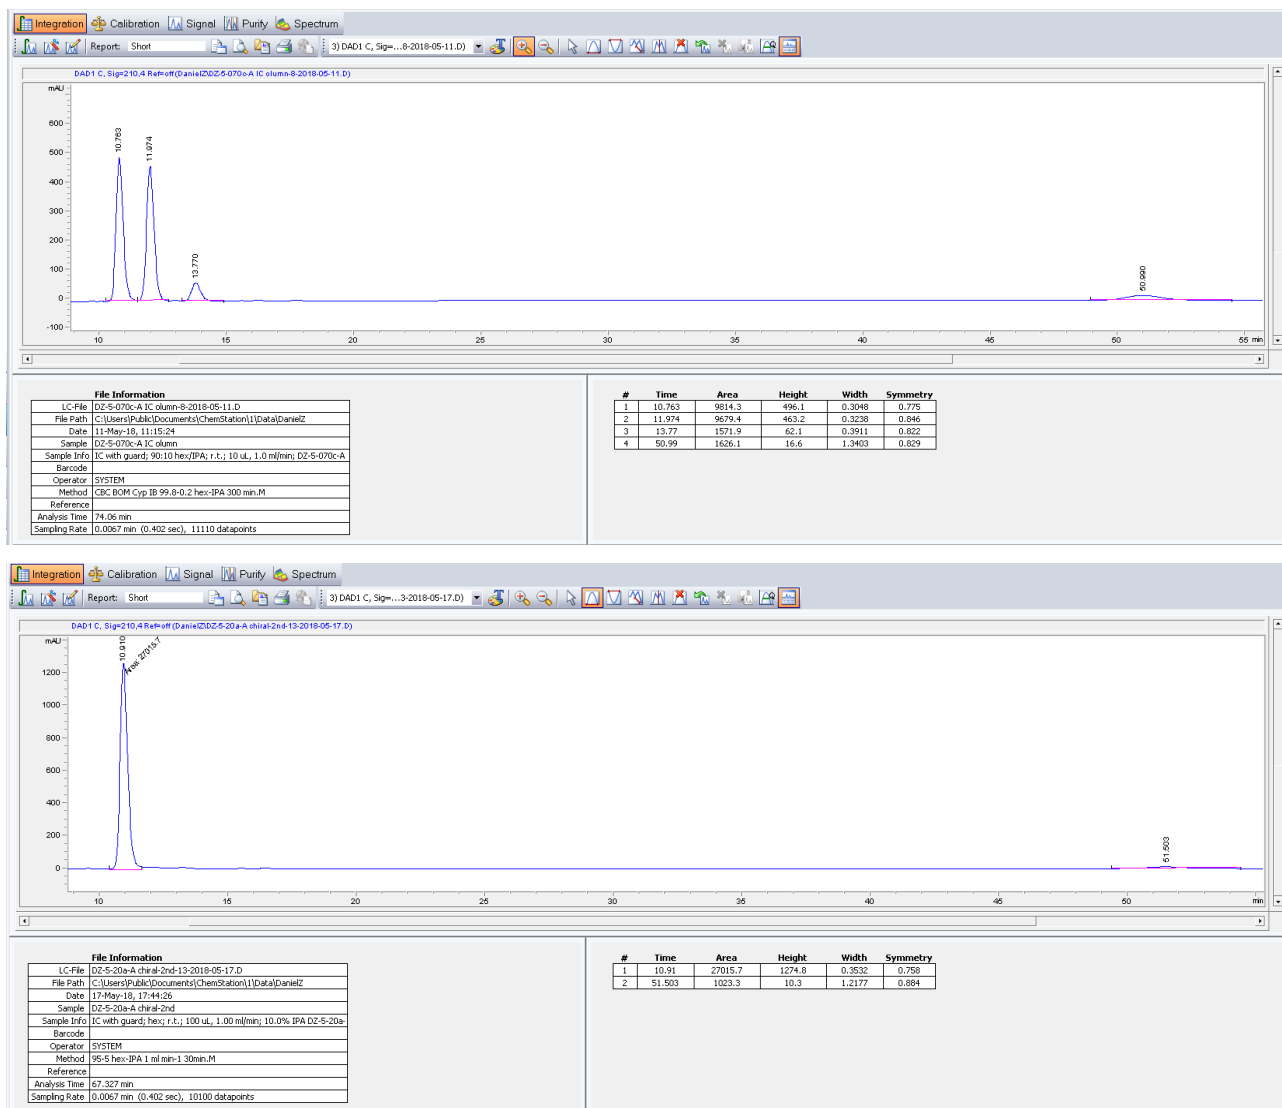

Compound (+)-**3ag** was determined to be > 99% ee by chiral HPLC (Chiralpak IC); 90:10 Hexane–*i*-PrOH at 1.0 mL/min; 210 nm.



iii) HPLC traces of (±)-**3ah** and (+)-**3ah**

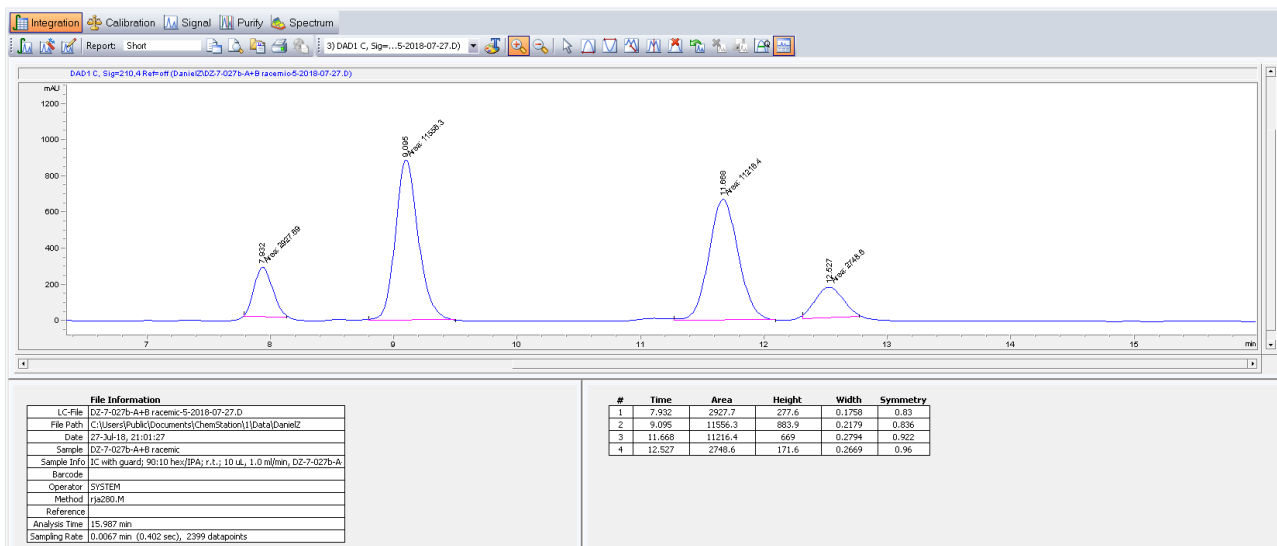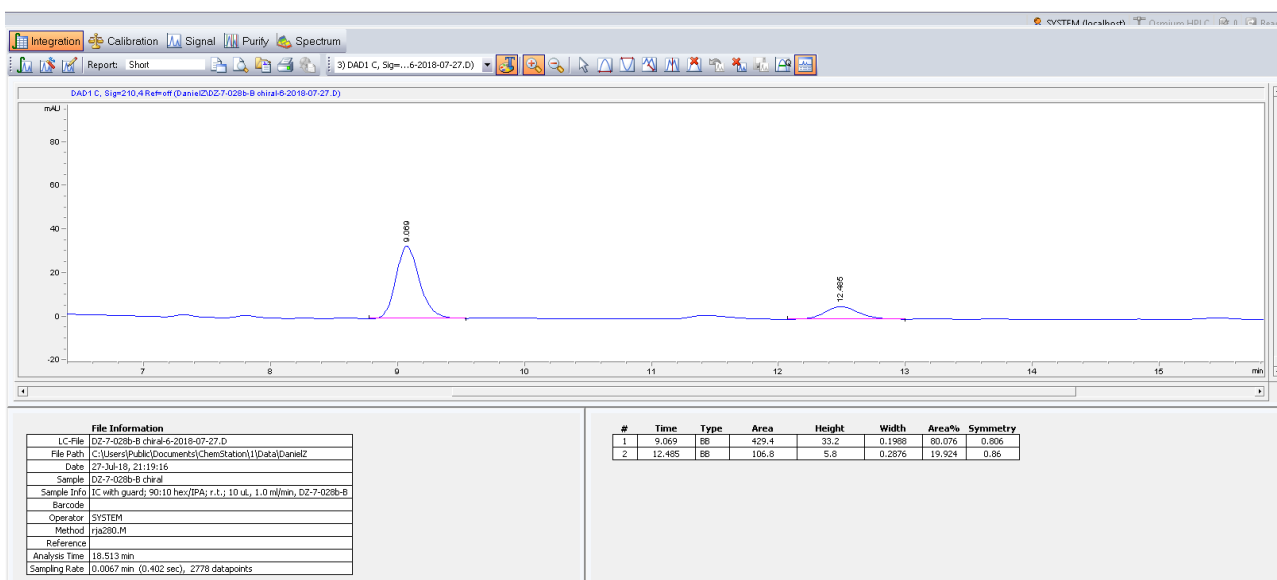

Compound (+)-**3ah** was determined to be > 99% ee by chiral HPLC (Chiralpak IC); 90:10 Hexane-*i*-PrOH at 1.0 mL/min; 210 nm.

iv) HPLC traces of (±)-**3ai** and (+)-**3ai**

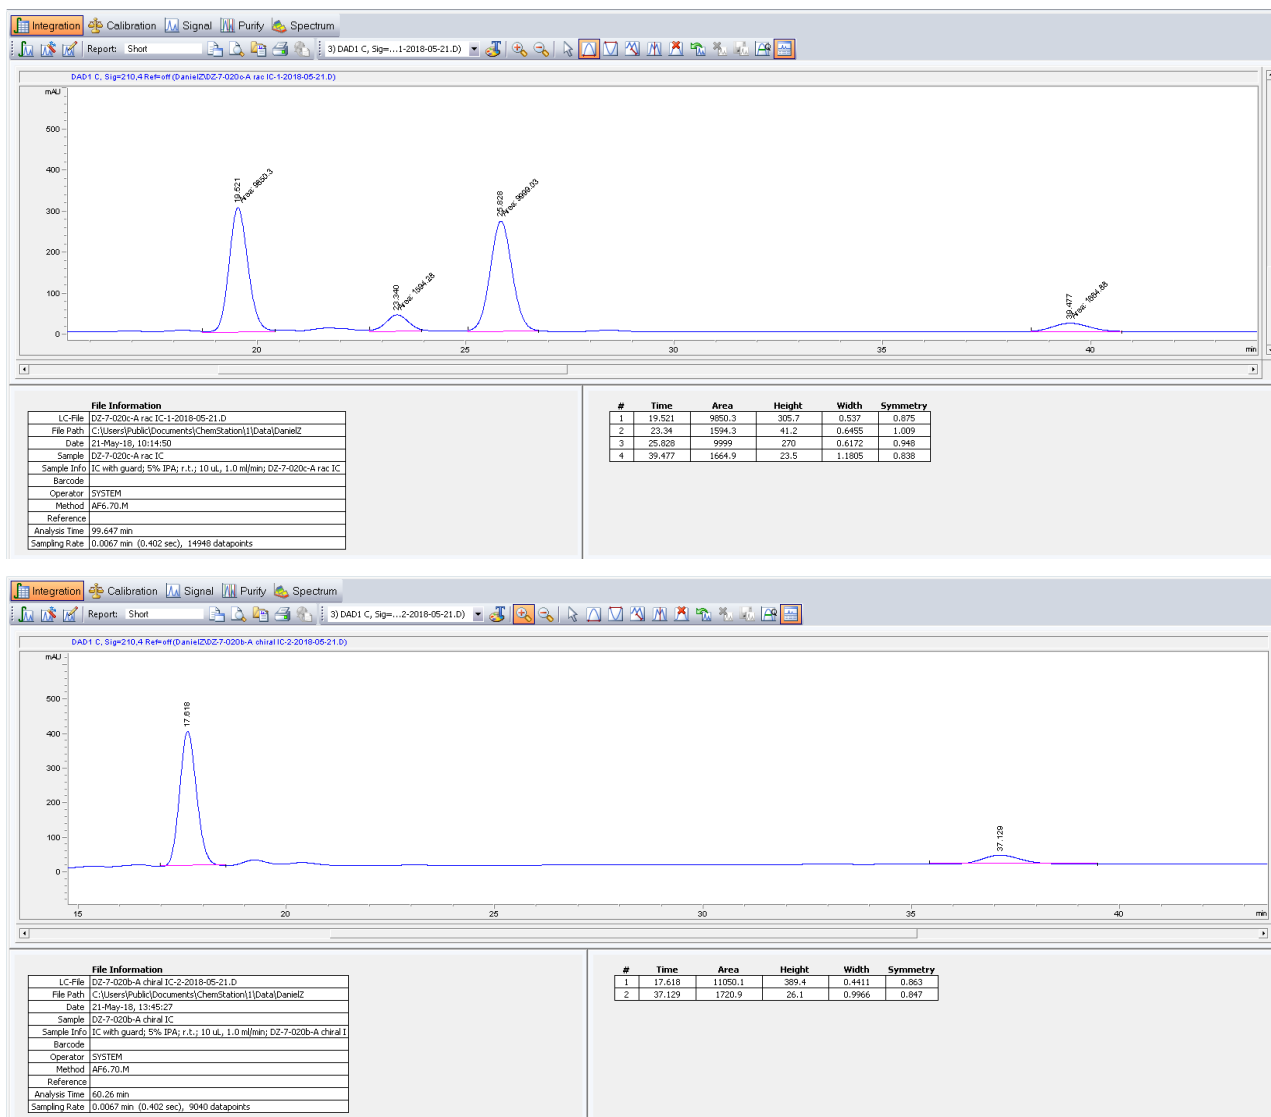

Compound (+)-**3ai** was determined to be > 99% ee by chiral HPLC (Chiralpak IC); 90:10 Hexane–*i*-PrOH at 1.0 mL/min; 210 nm.

#### 14. NMR study of compounds **3b**, **3aa** and (+)-**6c**

The  $^1\text{H}$  NMR spectrum of **3b** presents 2-H as a doublet ( $J = 7.2$  Hz) that has COSY crosspeaks with 3-H, while 6- $\text{H}_\text{A}$  is a multiplet that has COSY cross-peaks with 3-H, 6- $\text{H}_\text{B}$  and 7-H. Unfortunately 6- $\text{H}_\text{B}$  is overlapped with 3-H and 4- $\text{H}_\text{A}$  appears as a multiplet.

Additional support for the structure was found upon inspection of the NOESY 2D spectra of **3b**, that showed interactions between 2-H and 6- $\text{H}_\text{A}$  and between 2-H and 7-H, among others, confirming the *trans* relative stereochemistry.

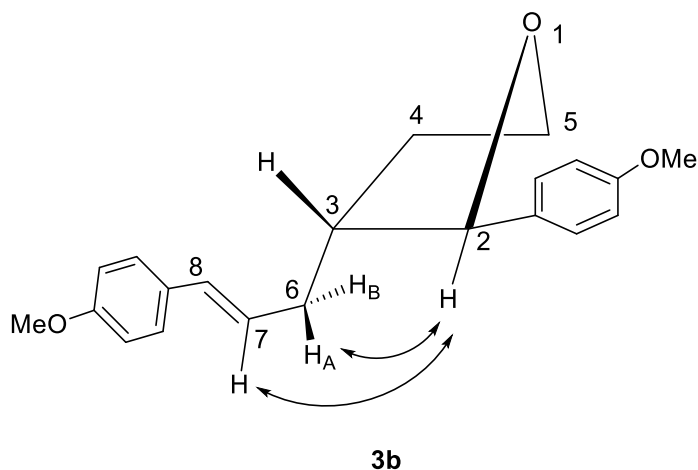

The  $^1\text{H}$  NMR spectrum of **3aa** presents 2-H as a doublet ( $J = 7.5$  Hz) that has COSY crosspeaks with 3-H, while 4-H is a doublet of doublet ( $J = 6.4, 3.4$  Hz) that has COSY cross-peaks with 3-H and 5-H. Moreover, 5-H is a quintet ( $J = 6.3$  Hz) that has COSY cross-peaks with 4-H and Me. Finally, 6-H is a doublet ( $J = 11.4$  Hz) that has COSY cross-peaks with 3-H.

Additional support for the structure was found upon inspection of the NOESY 2D spectra of **3aa**, that showed interactions between 2-H and 4-H, between 2-H and 5-H, between 2-H and 6-H, between 4-H and 6-H, among others, confirming the *trans-trans-cis* relative stereochemistry.

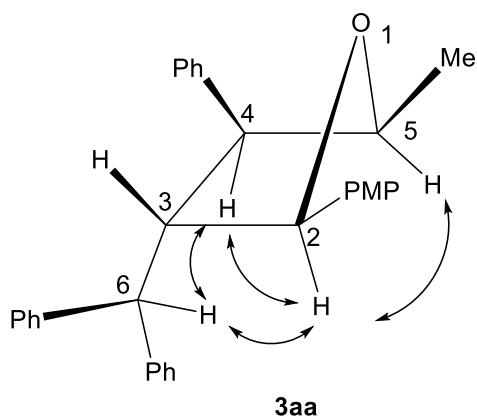

The  $^1\text{H}$  NMR spectrum of (+)-**6c** presents 2-H as a doublet ( $J = 8.7$  Hz) that has COSY crosspeaks with 3-H, while 4-H is a triplet of doublet ( $J = 7.9, 6.3$  Hz) that has COSY crosspeaks

with 3-H and 5-H<sub>2</sub>. Moreover, 6-H is a multiplet that has COSY crosspeaks with 3-H, 7-H<sub>A</sub>, 7-H<sub>B</sub> and 10-H<sub>2</sub>. Finally, 8-H is a doublet of triplet of doublet ( $J = 11.5, 9.0, 6.3$  Hz) that has COSY crosspeaks with 7-H<sub>A</sub>, 7-H<sub>B</sub> and 9-H<sub>2</sub>.

Additional support for the structure was found upon inspection of the NOESY 2D spectra of (+)-**6c**, that showed interactions between 2-H and 4-H, between 2-H and 6-H, between 2-H and 7-H<sub>A</sub>, between 6-H and 8-H, among others, confirming the relative stereochemistry below.

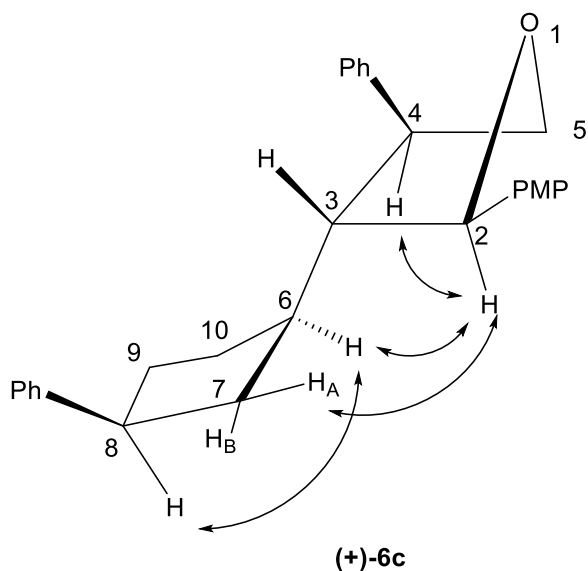

## 15. Mechanistic study

### a) Evidence for an allyl cation intermediate

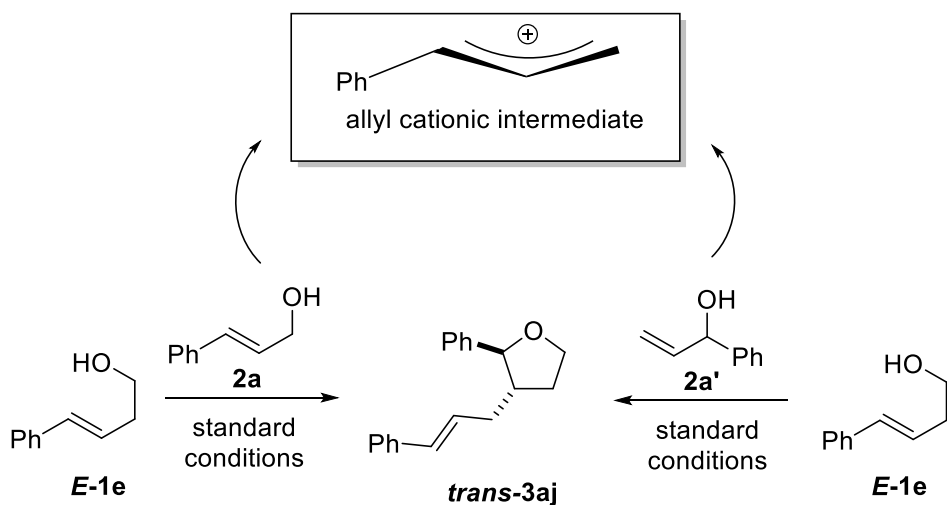

For those examples that involve allyl alcohols as alkylating agents, using two different regioisomeric allyl alcohols, **2a** and **2a'**, the same product **trans-3a** was obtained in similar yields, under identical conditions. These results support the formation of a common allyl cationic intermediate.

### b) Evidence for concerted mechanism

The possible influence of double bond geometry in homoallyl alcohol **1** was investigated. While the *E* isomer gives the *trans* diastereoisomer as a sole product, the *Z* isomer leads to a major *cis* product (stereochemistry was determined by NOESY-2D). These results point towards an asynchronous concerted mechanism.

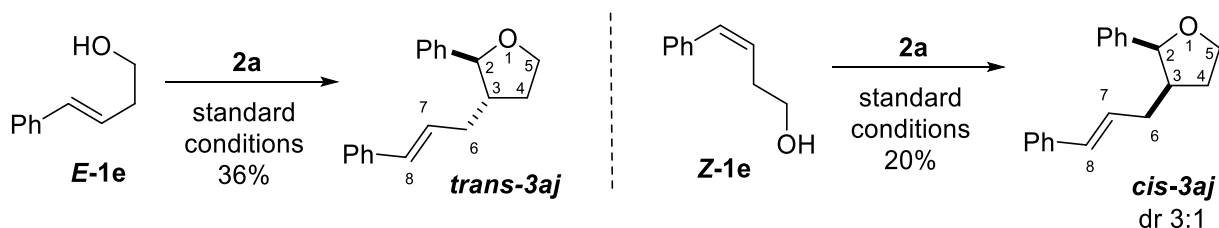

### c) Proposed mechanism

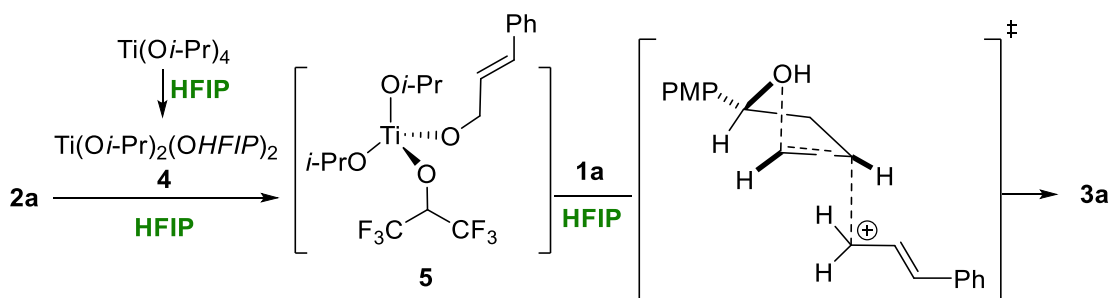

#### i) Isolation of stable titanium complex $\text{Ti}(\text{O}i\text{-Pr})_2(\text{OHFIP})_2$

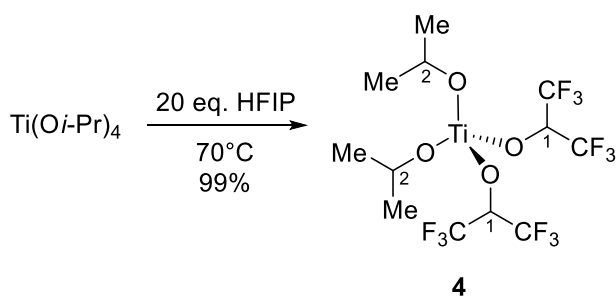

To a microwave vial charged with a stirring bar was added  $\text{Ti}(\text{O}i\text{-Pr})_4$  (100.0 mg, 0.3521 mmol) and HFIP (0.74 mL, 7.0 mmol), the solution was stirred under Ar at 70°C for 2 hours. Then the solvent was removed under reduced pressure to obtain a white foam.

Data for **4**  $\text{Ti}(\text{O}i\text{-Pr})_2(\text{OHFIP})_2$ :  $^1\text{H}$  NMR (500 MHz,  $\text{CDCl}_3$ )  $\delta$  4.82 (2H, m, 2 x 1-H), 4.64 (2H, m, 2 x 2-H), 1.29 (12H, d,  $J$  = 6.1 Hz, 4 x Me).  $^{13}\text{C}$  NMR (125 MHz,  $\text{CDCl}_3$ )  $\delta$  121.8 (q,  $J$  = 284.4 Hz, 4 x  $\text{CF}_3$ ), 82.0 (2 x C-2), 78.9 (2 x C-1), 25.7 (4 x Me).  $^{19}\text{F}$  NMR (471 MHz,  $\text{CDCl}_3$ )  $\delta$  -76.15 (12F, s, 4 x  $\text{CF}_3$ ).  $^{19}\text{F}$  (471 MHz,  $\text{CDCl}_3$ ) -  $^1\text{H}$  (500 MHz,  $\text{CDCl}_3$ ) HOESY: between  $\text{CF}_3$  and Me (irradiate  $^{19}\text{F}$  @ -76.15 ppm). HRMS (EI):  $m/z$  (ESI+) 147.0 [100], 295.0 [81], 499.0 [1.2], 500.0 [0.3], 501.0 [0.8],  $\text{C}_{12}\text{H}_{16}\text{F}_{12}\text{O}_4\text{Ti}$  [M] $^+$  predicted  $m/z$  500.0331, found  $m/z$  500.0311, Delta = + 3.9 ppm.

## ii) Evidence of intermediate complex 5

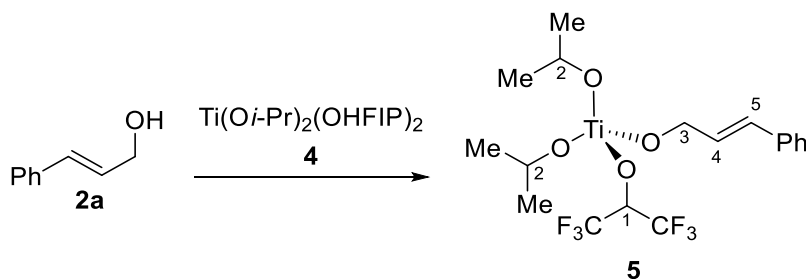

To a microwave vial charged with a stirring bar was added cinnamyl alcohol **E-2a** (23.5 mg, 0.175 mmol),  $\text{Ti}(\text{O}i\text{-Pr})_2(\text{OHFIP})_2$  **4** (74.6 mg, 0.353 mmol) and  $\text{CDCl}_3$  (2.0 mL). The solution was stirred under Ar for 10 min. and then the solution was transferred to an NMR tube for NMR experiments (the present of broad peaks in proton NMR made integration difficult).

Data for **5'**:  $^1\text{H}$  NMR (500 MHz,  $\text{CDCl}_3$ )  $\delta$  7.21-7.40 (5H, m, Ar), 6.60 (1H, d,  $J$  = 15.9 Hz, 5-H), 6.37 (1H, dt,  $J$  = 14.9, 5.8 Hz, 4-H), 4.38-4.66 (3H, m, 1-H and 3-H<sub>2</sub>), 3.95-4.24 (2H, m, 2 x 2-H), 1.22 (12H, d,  $J$  = 6.2 Hz, 4 x Me).  $^{19}\text{F}$  NMR (471 MHz,  $\text{CDCl}_3$ )  $\delta$  -75.65 (6F, s, 2 x  $\text{CF}_3$ ). NOESY- 2D (500 MHz,  $\text{CDCl}_3$ ): between 3-H<sub>2</sub> and Me, between 2-H and Me.

## iii) Evidence of formation of product 3a from complex 5

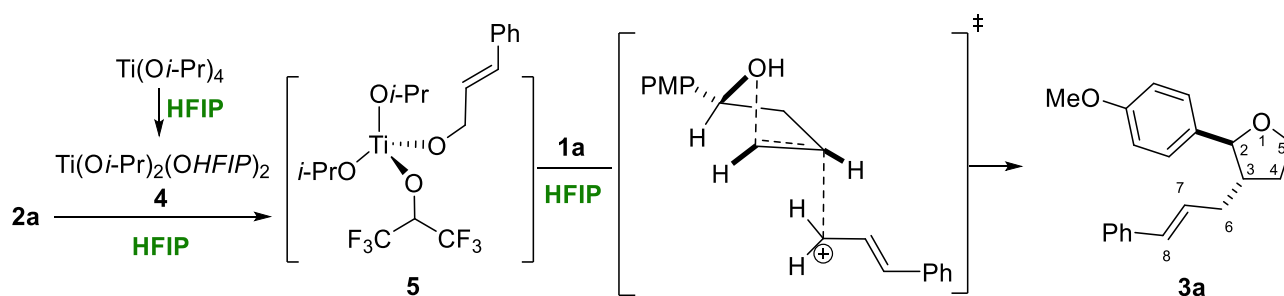

To a microwave vial charged with a stirring bar was added cinnamyl alcohol **E-2a** (23.5 mg, 0.175 mmol),  $\text{Ti}(\text{O}i\text{-Pr})_2(\text{OHFIP})_2$  **4** (74.6 mg, 0.353 mmol) and  $\text{CDCl}_3$  (2.0 mL). The solution was stirred under Ar for 10 min. and then alcohol **1a** (31.1 mg, 0.175 mmol) and HFIP (1.75 mL) were added. The reaction was heated overnight at 70°C. Solvent was then removed by evaporator. Purification using silica gel flash chromatography (gradient elution: 12%  $\rightarrow$  20%  $\text{Et}_2\text{O}$  - pentane) afforded **3a** as a colorless oil (20.6 mg, 40%).

Data for **3a** matched those previously reported.

## 16. References

- (1) Huo, X.; He, R.; Fu, J.; Zhang, J.; Yang, G.; Zhang, W. *J. Am. Chem. Soc.* **2017**, *139* (29), 9819–9822.
- (2) Carreño, M. C.; García-Cerrada, S.; Urbano, A.; Di Vitta, C. *J. Org. Chem.* **2000**, *65* (14), 4355–4363.
- (3) Shibuya, M.; Ito, S.; Takahashi, M.; Iwabuchi, Y. *Org. Lett.* **2004**, *6* (23), 4303–4306.
- (4) Linnios, D.; Kokotos, C. G. *J. Org. Chem.* **2014**, *79* (10), 4270–4276.
- (5) Moskalenko, A. I.; Belopukhov, S. L.; Ivlev, A. A.; Boev, V. I. *Russian J. Org. Chem.* **2011**, *47* (7), 1091–1096.
- (6) Chintalapudi, V.; Galvin, E. A.; Greenaway, R. L.; Anderson, E. A. *Chem. comm.* **2016**, 693–696.
- (7) Lee, J.; Torker, S.; Hoveyda, A. H. *Angewandte Chemie Int. Ed.* **2017**, *56*(3), 821–826.
- (8) Nuzzi, A.; Fiasella, A.; Antonio, J.; Pagliuca, C.; Ponzano, S.; Pizzirani, D.; Mandrup, S.; Ottonello, G.; Tarozzo, G.; Reggiani, A. *J. Med. Chem.* **2016**, *111*, 138–159.
- (9) Grigg, R. D.; Van Hoveln, R.; Schomaker, J. M. *J. Am. Chem. Soc.* **2012**, *134* (39), 16131–16134.
- (10) Cho, S. J.; Jensen, N. H.; Kurome, T.; Kadari, S.; Manzano, M. L.; Malberg, J. E.; Caldarone, B.; Roth, B. L.; Kozikowski, A. P. *J. Med. Chem.* **2009**, *52* (7), 1885–1902.
- (11) Poplata, S.; Bach, T. *J. Am. Chem. Soc.* **2018**, *140* (9), 3228–3231.
- (12) Yang, F.; Rauch, K.; Kettelhoit, K.; Ackermann, L. *Angewandte Chemie Int. Ed.* **2014**, *1* (II), 11285–11288.
- (13) Liu, G.; Wurst, J. M.; Tan, D. S. *Org. Lett.* **2009**, *11* (16), 3670–3673.
- (14) Colomer, I.; Coura Barcelos, R.; Donohoe, T. J. *Angewandte Chemie Int. Ed.* **2016**, *55* (15), 4748–4752.
- (15) Karimi, B.; Maleki, J. *J. Org. Chem.* **2003**, *68* (12), 4951–4954.
- (16) Chong, K.-W.; Hong, F.-J.; Thomas, N. F.; Low, Y.-Y.; Kam, T.-S. *J. Org. Chem.* **2017**, *82* (12), 6172–6191.
- (17) Patel, N. R.; Kelly, C. B.; Jouffroy, M.; Molander, G. A. *Org. Lett.* **2016**, *18* (4), 764–767.
- (18) Chen, B.; Cao, P.; Yin, X.; Liao, Y.; Jiang, L.; Ye, J.; Wang, M.; Liao, J. *ACS Catal.* **2017**, *7* (4), 2425–2429.
- (19) Sinisterra, V.; Pregmolato, M. *Tetrahedron Letters.* **2011**, *67*, 2670–2675.
- (20) Luan, X.; Mariz, R.; Gatti, M.; Costabile, C.; Poater, A.; Cavallo, L.; Linden, A.; Dorta, R. *J. Am. Chem. Soc.* **2008**, *130* (21), 6848–6858.
- (21) Li, P.; Yi, C.; Qu, J. *Biomolecular Chemistry.* **2015**, *13*(17), 5012–5021.
- (22) Alamillo-Ferrer, C.; Karabourniotis-Sotti, M.; Kennedy, A. R.; Campbell, M.; Tomkinson, N. C. O. *Org. Lett.* **2016**, *18* (13), 3102–3105.
- (23) Chromans, F.; Alder, I. H. *Chemistry - A European Journal.* **2010**, *10210*, 1445–1448.
- (24) Baldwin, John J.; Claremon, David A.; Tice, Colin M.; Cacatian, Salvacion; Dillard, Lawrence W.; Ishchenko, Alexey V.; Yuan, Jing; Xu, Zhenrong; Mcgeehan, Gerard; Zhao, Wei; Simpson, Robert D.; Singh, Suresh B.; Flaherty, Patrick T. WO 2007117557A2, Oct 18, 2007
- (25) Yong, S.; Chem, G. *Chem. Soc. Rev.* **2018**, *47*, 53–68.
- (26) Denmark, S. E.; Wang, Z. *Org. Lett.* **2001**, *3* (7), 1073–1076.
- (27) Nagarajan, S. R.; Lu, H.; Gasiecki, A. F.; Khanna, I. K.; Parikh, M. D.; Desai, B. N.; Rogers, T. E.; Clare, M.; Chen, B. B.; Russell, M. A. *Bioorg. Med. Chem.* **2007**, *15*, 3390–3412.
- (28) Marie K.; Brands J.; Brewer S. E.; Davies A. J.; Dolling Ulf H.; Hammond D. C.; Lieberman D. R.; Scott J. P. WO2005080309A1, 01 Sep 2005.
- (29) Tian Y.; Xu X.; Zhang L.; Qu J. *Org. Lett.*, **2016**, *18* (2), pp 268–271.
- (30) Yamauchi Y.; Miyake Y.; Nishibayashi Y. *Organometallics* **2009**, *28*, 1, 48–50.
